# Supplementary material for: Public acceptability of financial incentives for smoking cessation in pregnancy and breast feeding: a survey of the British public
Source: PubMed Central journal article supplement — BMJ Open. 2014 Jul 12;4(7):e005524. doi: 10.1136/bmjopen-2014-005524 (PMC4120368; doi:10.1136/bmjopen-2014-005524), 2014-07-12
Supplement: bmjopen-2014-005524.draft_revisions.pdf [file bmjopen-2014-005524.draft_revisions.pdf]

# BMJ Open

## Public acceptability of financial incentives for smoking cessation in pregnancy and breastfeeding

|                                 |                                                                                                                                                                                                                                                                                                                                                                                                                                                                                                                                                                                                                                                                                                                                          |
|---------------------------------|------------------------------------------------------------------------------------------------------------------------------------------------------------------------------------------------------------------------------------------------------------------------------------------------------------------------------------------------------------------------------------------------------------------------------------------------------------------------------------------------------------------------------------------------------------------------------------------------------------------------------------------------------------------------------------------------------------------------------------------|
| Journal:                        | <i>BMJ Open</i>                                                                                                                                                                                                                                                                                                                                                                                                                                                                                                                                                                                                                                                                                                                          |
| Manuscript ID:                  | bmjopen-2014-005524                                                                                                                                                                                                                                                                                                                                                                                                                                                                                                                                                                                                                                                                                                                      |
| Article Type:                   | Research                                                                                                                                                                                                                                                                                                                                                                                                                                                                                                                                                                                                                                                                                                                                 |
| Date Submitted by the Author:   | 21-Apr-2014                                                                                                                                                                                                                                                                                                                                                                                                                                                                                                                                                                                                                                                                                                                              |
| Complete List of Authors:       | Hoddinott, Pat; University of Stirling, Nursing, Midwifery and Allied Health Professional Research Unit<br>Morgan, Heather; University of Aberdeen, Health Services Research Unit<br>Maclennan, Graeme; University of Aberdeen, Health Services Research Unit; University of Aberdeen<br>Sewel, Kate; Ipsos MORI Scotland,<br>Thomson, Gillian; University of Central Lancashire, Maternal and Infant Nutrition and Nurture Unit<br>Bauld, Linda; University of Stirling, Health Policy and Social Marketing<br>Yi, Deokhee; University of Aberdeen, Health Economics Research Unit<br>Ludbrook, Anne; University of Aberdeen, Health Economics Research Unit<br>Campbell, Marion; University of Aberdeen, Health Services Research Unit |
| <b>Primary Subject Heading</b>: | Public health                                                                                                                                                                                                                                                                                                                                                                                                                                                                                                                                                                                                                                                                                                                            |
| Secondary Subject Heading:      | Public health, Smoking and tobacco, Paediatrics, Obstetrics and gynaecology, Nutrition and metabolism                                                                                                                                                                                                                                                                                                                                                                                                                                                                                                                                                                                                                                    |
| Keywords:                       | PREVENTIVE MEDICINE, PUBLIC HEALTH, SOCIAL MEDICINE                                                                                                                                                                                                                                                                                                                                                                                                                                                                                                                                                                                                                                                                                      |
|                                 |                                                                                                                                                                                                                                                                                                                                                                                                                                                                                                                                                                                                                                                                                                                                          |

SCHOLARONE™  
Manuscripts

**Title: Public acceptability of financial incentives for smoking cessation in pregnancy and breastfeeding**

**Authors:** Pat Hoddinott, Heather Morgan, Graeme MacLennan, Kate Sewel, Gill Thomson, Linda Bauld, Deokhee Yi, Anne Ludbrook, Marion K Campbell.

Nursing, Midwifery and Allied Health Professions Research Unit, University of Stirling, Stirling FK9 4LA, UK.

Pat Hoddinott, Chair in Primary Care

Health Services Research Unit, University of Aberdeen, Aberdeen AB25 2ZD, UK.

Heather Morgan, Research Fellow in Social Science

Health Services Research Unit, University of Aberdeen, Aberdeen AB25 2ZD, UK.

Graeme MacLennan, Senior Research Fellow in Statistics

Ipsos MORI Scotland, Edinburgh, EH3 6DH, UK.

Kate Sewel, Senior Researcher

Maternal and Infant Nutrition and Nurture Unit, University of Central Lancashire, Preston PR1 2HE, UK

Gill Thomson, Senior Research Fellow in Social Science

Health Policy and Social Marketing, University of Stirling, Stirling FK9 4LA, UK

Linda Bauld, Professor of Health Policy

Health Economics Research Unit, University of Aberdeen, Aberdeen AB25 2ZD, UK

Deokhee Yi, Research Fellow in Health Economics

Health Economics Research Unit, University of Aberdeen, Aberdeen AB25 2ZD, UK

Anne Ludbrook, Professor of Health Economics

Health Services Research Unit, University of Aberdeen, Aberdeen AB25 2ZD, UK.

Marion K Campbell, Director & Professor of Health Services Research

**Correspondence to:** [p.m.hoddinott@stir.ac.uk](mailto:p.m.hoddinott@stir.ac.uk)

**Copyright:** The Corresponding Author has the right to grant on behalf of all authors and does grant on behalf of all authors, ***a worldwide licence*** to the Publishers and its licensees in perpetuity, in all forms, formats and media (whether known now or created in the future), to i) publish, reproduce, distribute, display and store the Contribution, ii) translate the Contribution into other languages, create adaptations, reprints, include within collections and create summaries, extracts and/or, abstracts of the Contribution, iii) create any other derivative work(s) based on the Contribution, iv) to exploit all subsidiary rights in the Contribution, v) the inclusion of electronic links from the Contribution to third party material where-ever it may be located; and, vi) licence any third party to do any or all of the above."

## Abstract

### Objective

To survey public attitudes about incentives for smoking cessation in pregnancy and breastfeeding to inform trial design

### Design

Cross sectional survey

### Setting and participants

UK general public

### Methods

Seven promising incentive strategies had been identified from evidence syntheses and qualitative interview data from service users and providers. These were shopping vouchers for: (i) validated smoking cessation in pregnancy and (ii) after birth; (iii) for a smoke-free home; (iv) for proven breastfeeding; (v) a free breast pump; (vi) payments to health services for reaching smoking cessation in pregnancy targets and (vii) breastfeeding targets. Ipsos MORI used area quota sampling and home-administered computer-assisted questionnaires, with randomised question order to assess agreement with different incentives (measured on a 5-point scale). Demographic data and target behaviour experience were recorded. Analysis used multivariable ordered logit models.

### Results

Agreement with incentives was mixed (ranging from 34-46%) among a representative sample of 1144 UK adults. Mean agreement score was highest for a free breast pump; and lowest for incentives for smoking abstinence after birth. More women disagreed with shopping vouchers than men. Those with lower levels of education disagreed more with smoking cessation incentives and a breast pump. Those aged 44 or under agreed more with all incentive strategies compared to those aged 65 and over, particularly provider targets for smoking cessation. Non-white ethnic groups agreed particularly with breastfeeding incentives. Current smokers with previous stop attempts and respondents who had breastfed children agreed with providing vouchers for the respective behaviours. Up to £40 per month vouchers for behaviour change were acceptable (>85%).

### Conclusion

Women and the less educated were more likely to disagree, but those of child-bearing age to agree, with incentives designed for their benefit. Trials evaluating reach, impact on health inequalities and ethnic groups are required prior to implementing incentive interventions.

**Prospero Registration:** CRD42012001980

## Article summary

### Strengths and limitations of this study

This large cross sectional survey of attitudes to incentives for smoking cessation around pregnancy and breastfeeding was conducted by an internationally recognised independent company using rigorous methods to achieve a representative sample of the UK general public.

Our multi-disciplinary mixed methods approach to survey design and to investigating two behaviours concurrently, used an innovative participatory approach to incorporate service user perspectives.

Original findings show that women and those with fewer educational qualifications are more likely to disagree with incentives, raising concerns about the implications for health inequalities, as these are intended target populations for behaviour change.

Important limitations relate to the unknown generalisability to other countries; non-responder and selection biases; and other unknown confounders.

Although we randomised the order of smoking and breastfeeding questions, further framing effects are possible particularly for the introductory statements.

## Introduction

Government interventions to change lifestyle behaviours are increasingly incorporating incentives to encourage healthy choices<sup>1</sup>, but directly paying people is seen to be the least acceptable approach<sup>2</sup>, with minimally intrusive interventions deemed more acceptable.<sup>1</sup> Experimental studies investigating incentives for smoking cessation in a general population show that incentive acceptability increases with effectiveness.<sup>3</sup> Media coverage of incentive interventions tends to focus on a range of concerns including perceived unfairness to those who already make healthy choices; appearing to reward unhealthy behaviours; potential for abuse; opportunity costs; the need to monitor and safeguard; and “Big Brother” or “nanny state” authoritarianism. However, incentives can demonstrate to people that they are worthy of being helped and can facilitate connections between recipients and care providers.<sup>4</sup> Incentives addressing outcomes for children appear more acceptable than outcomes for adults.<sup>1,5</sup>

In the UK there are marked inequalities in health between social groups. Incentives are one strategy that could be used to redistribute resources through targeting or proportionate universalism,<sup>6</sup> as lifestyle behaviours that compromise health around childbirth are socially patterned<sup>7</sup> and cluster in more disadvantaged communities.<sup>8</sup> For example, pregnant mothers aged 20 or under are: more than five times less likely to be breastfeeding at four months; three times more likely to smoke before or during pregnancy and are less likely to stop smoking compared to mothers aged 35 or over.<sup>7</sup> In 2010 in the UK, the breastfeeding initiation rate was 90% for mothers in managerial and professional occupations, compared with 74% of mothers in routine and manual occupations, with a difference in smoking before or during pregnancy of 14% and 40% respectively.<sup>7</sup> In 2010, 32% of pregnant women lived in a household where at least one other person smoked during pregnancy.<sup>7</sup>

There is promising evidence supporting financial incentives for smoking cessation in pregnancy:<sup>9-11</sup> interventions that include incentives are more effective than pharmacotherapy and/or psycho-social interventions alone.<sup>9</sup> However, the level of the incentive and the nature of accompanying behaviour change techniques provided alongside incentives, are likely to be confounders.<sup>9,11</sup> Reported trials to date have small samples.<sup>9-11</sup> In addition, important concerns about limited reach, particularly to the more marginalised in society, have been raised.<sup>12,13</sup> There are fewer incentive trials of interventions to initiate or maintain breastfeeding<sup>14</sup> and generalisability of support interventions to predominantly formula feeding cultures like the UK is uncertain.<sup>15</sup>

1  
2  
3 This survey aimed to investigate the public acceptability of a shortlist of promising incentive  
4 strategies for stopping smoking in pregnancy or breastfeeding. This is particularly important  
5 in countries where health care is state funded. The ultimate study aim was to inform the  
6 design of incentive intervention trials for smoking in pregnancy and breastfeeding and to  
7 improve understanding of the mechanisms of action of incentives. As this is a relatively new  
8 field of research, a broad definition of incentive was applied (Panel 1).  
9  
10  
11

## 12 13 **Methods**

### 14 ***Survey design***

15 A shortlist of seven promising incentive strategies (Panel 2) had been developed prior to the  
16 survey administration, informed by evidence syntheses, input from mother and baby group  
17 members who were partners in the research and qualitative research with a range of  
18 stakeholders.<sup>16</sup> In the survey (Web1, p1-4), acceptability of the shortlisted interventions was  
19 measured on a 5-point Likert style scale from strongly agree to strongly disagree. Those  
20 responding strongly agree, agree or neither agree nor disagree to voucher incentives were  
21 asked whether incentives should be universally provided or to low income women only and  
22 to choose an acceptable value (£2, £10, £20, £40, £60, £80) for shopping vouchers provided  
23 monthly to women who prove that they have stopped smoking or are breastfeeding. The  
24 values were selected to represent the range identified in the evidence syntheses. Careful  
25 consideration was given to framing effects, as greater acceptability is reported for a *reward*  
26 rather than *payment*<sup>17</sup> and with increased effectiveness.<sup>3</sup>  
27  
28  
29  
30  
31  
32  
33  
34  
35

### 36 ***Data collection***

37 Ipsos MORI used a controlled form of random location sampling to identify 161 geographical  
38 sites (Web2, p5-6). Trained field researchers were asked to interview five people at home  
39 from 250 addresses at each site, to obtain a nationally and regionally representative sample  
40 of adults aged 18 or over between 22 March 2013 – 15 April 2013. Quotas were set for age,  
41 sex, and region and the data weighted to the known profile of Great Britain using age, sex,  
42 government office region, social grade, taken a foreign holiday in the last three years,  
43 housing tenure, working status, and the number of cars in the household. Interviewers used  
44 Computer Assisted Personal Interviewing (CAPI) with randomisation of the order for smoking  
45 and breastfeeding incentive questions generated independently and automated using CAPI  
46 software, to investigate question order framing effects. Incentive questions were asked after  
47 the demographic questions, but before the parent, smoking and breastfeeding status  
48 questions.  
49  
50  
51  
52  
53  
54  
55  
56  
57

### 58 ***Statistical analysis***

1  
2  
3 An *a priori* target sample size of 1000 was set to allow us to estimate proportions to within  
4 3% with 95% confidence. A priori questions asked:

- 5  
6 1. Is the acceptability of the seven shortlisted incentive strategies influenced according  
7 to age (categories 18-24, 25-34, 35-44, 45-54, 55-59, 60-64, 65 and over); sex;  
8 social grade (A and B, C1, C2, D, E); region (North, North West, Yorkshire and  
9 Humberside, East Midlands, West Midlands, East Anglia, South East, South West,  
10 London, Wales, Scotland); ethnicity (White British, Other Ethnicity); education  
11 (University, GCSE or equivalent, A-level or equivalent, no formal qualifications, still  
12 studying or other qualifications, or don't know); having children (yes, no); personal  
13 experience of smoking (never smoked, ex-smoker, current smoker - failed to stop, or  
14 no attempts to stop); had a child ever been breastfed (even if for only a day or two)?
- 15  
16 2. What are the independent predictors of acceptability of the shortlist of incentive  
17 strategies?
- 18  
19 3. What value of incentive is most acceptable and what are the independent predictors  
20 of the preferred incentive value?
- 21  
22 4. Are universal incentives preferred to incentives targeted at low income women and  
23 what are the independent predictors for preference?

24  
25  
26  
27  
28  
29 Data were described using the appropriate summary statistics where relevant. Responses to  
30 the Likert style outcome survey items were summarised by number, percentage and mean,  
31 and graphed using bar charts. Responses to these outcome items were tabulated, broken  
32 down by the independent predictor variables specified above. Net agreement (agree and  
33 strongly agree) and net disagreement (disagree and strongly disagree) were also reported  
34 as number and percentage. Simple and multiple ordered logit regression models were used  
35 to determine the independent predictors of acceptability for the shortlist. The relationship  
36 between predictor and outcomes variables was summarised using the odds ratio and 95%  
37 confidence intervals. For the financial value and targeting of incentives to low income women  
38 only (research questions 3 and 4) two part models were used. For research question 3, the  
39 value of incentives, a probit model was used to estimate a 'positive' response (i.e. strongly  
40 agree, agree, or neither agree nor disagree) and then linear regression was used to model  
41 the amount of shopping voucher acceptable conditional on a positive response. For research  
42 question 4, targeting low income women only, a similar model was used but as the  
43 conditional response here was dichotomous a probit model was used instead of linear  
44 regression. In all models the most affluent status was used as the reference category where  
45 appropriate (i.e. male; white ethnicity; university qualification; Social grade A or B; resident in  
46 London; no children; never smoked; child breastfed). Age was entered as 5-year categories.  
47 All analyses were done in Stata 13 (StataCorp. 2013. Stata Statistical Software: Release 13.  
48 College Station, TX: StataCorp LP).



### ***Role of the funding source***

The funders had no role in the data collection, analysis, interpretation, the writing of the manuscript or the decision to submit.

### **Findings**

The characteristics of the 1144 representatives of the UK public who participated in the CAPIBUS survey and any variables with missing data are detailed in Table 1.

### ***Overall acceptability of incentives***

The acceptability of the seven promising incentive strategies was mixed (Figure 1 and Table 2). Between 34-46% agreed with these incentives. Overall, the most acceptable incentive, with net agreement of 46% and net disagreement of 28%, was to provide a breast pump worth £40 to help women continue breastfeeding. The least acceptable incentives were shopping vouchers given to women who continue to stop smoking after birth (net agreement 37% and net disagreement 47%) or given to women to maintain a smoke-free home (net agreement 34% and net disagreement 46%). The general public expressed collective uncertainty about providing funding to local health service providers to meet smoking cessation in pregnancy or breastfeeding targets: just over a third of the respondents agreed and a third disagreed. Framing effects with question randomisation were observed (Web3, p7-8). Significantly higher agreement with all breastfeeding incentive strategies was observed when breastfeeding questions were asked before the smoking questions: vouchers for breastfeeding OR 2.00 (95% CI 1.61, 2.46;  $p < 0.001$ ); a free breast pump OR 1.32 (95% CI, 1.08, 1.62;  $p < 0.008$ ); and provider incentives for breastfeeding targets OR 1.44 (95% CI, 1.17, 1.77;  $p < 0.001$ ). Differences in agreement for all smoking cessation incentive strategies were non-significant when the smoking questions were asked before the breastfeeding questions.

### ***Independent predictors of agreement with incentives***

Table 3 describes the independent predictors of agreement with incentives. For aid of interpretation and comparison, we have summarised the odds ratios (ORs) into groups (OR  $< 0.5$ ,  $\geq 0.5$  to  $< 1.0$ ,  $\geq 1.0$  to  $< 1.5$ ,  $\geq 1.5$  to  $< 2.0$ , and  $\geq 2.0$ ). Full results tables are available (Web4, p9-44). Being of childbearing age (44 and under) was an independent predictor of agreement with all seven incentive strategies, with agreement generally decreasing with increased age. Agreement amongst the 44 and under age group compared to the 65 and over age group was strongest for provider targets for smoking cessation in pregnancy (OR  $\geq 2.0$ ).



1  
2  
3  
4 Women who are (or would have been when younger) the intended recipients of the  
5 vouchers, were less likely to agree with any shopping vouchers for: smoking cessation  
6 during pregnancy OR 0.71 (95% CI 0.57, 0.88;  $p = 0.002$ ), after birth OR 0.68 (95% CI 0.55,  
7 0.85;  $p=0.001$ ), smoke-free homes OR 0.72 (95% CI 0.58, 0.90;  $p=0.003$ ) or breastfeeding  
8 OR 0.77 (95% CI 0.62, 0.95;  $p = 0.016$ ) when compared to men.  
9  
10  
11

12  
13 Respondents with lower educational level, when compared to those with degree level  
14 qualifications, were more likely to disagree ( $0.5 \leq OR < 1.0$ ) with shopping voucher incentives  
15 given to women for smoking cessation before or after birth, a free breast pump, or for  
16 additional funding to local health services for meeting smoking cessation targets. There was  
17 no evidence of difference across education groups for vouchers for breastfeeding or  
18 additional payments to local health services for meeting breastfeeding targets.  
19  
20  
21  
22  
23

24 The associations with lower social grade when compared to social grade A and B combined  
25 were less clear. Social grade E predicted agreement with shopping vouchers for smoking  
26 cessation in pregnancy (OR 1.74; 95% CI 1.12, 2.70;  $p = 0.014$ ) and a free breast pump (OR  
27 1.57; 95% CI 1.00, 2.46;  $p = 0.05$ ); social grade C2 predicted agreement with vouchers for  
28 continued smoking cessation after birth (OR 1.64; 95% CI 1.18, 2.27  $p = 0.003$ ); but in  
29 contrast social grade C1 predicted disagreement with additional funding to local health  
30 services for meeting smoking cessation targets (OR 0.68; 95% CI 0.50, 0.94  $p = 0.019$ ).  
31  
32  
33  
34  
35

36 Being from a non-white British ethnic group, when compared to being white British, was a  
37 strong predictor of agreeing with breastfeeding vouchers (OR 2.03; 95% CI 1.43, 2.88;  $p <$   
38  $0.001$ ) and with additional funding to local health services for meeting breastfeeding targets  
39 (OR 2.31; 95% CI 1.63, 3.29;  $p < 0.001$ ) but not for a free breast pump. Being from a non-  
40 white British group also predicted agreement with vouchers for stopping smoking in  
41 pregnancy (OR 1.42; 95% CI 1.01, 1.99;  $p = 0.047$ ) and a smoke-free home (OR 1.49; 95%  
42 CI 1.06, 2.08;  $p = 0.021$ ).  
43  
44  
45  
46  
47

48 Current smokers who had tried stopping in the past were more likely to agree with vouchers  
49 for stopping smoking in pregnancy (OR 1.63; 95% CI 1.18, 2.26;  $p = 0.003$ ) and for  
50 maintaining a smoke-free home after birth (OR 1.48; 95% CI 1.08, 2.04;  $p = 0.016$ ), but not  
51 for continued smoking cessation after birth, or provider incentives to meet smoking cessation  
52 targets. Those with a breastfed child were more likely to agree with vouchers for  
53 breastfeeding OR 1.67 (95% CI 1.24, 2.25;  $p = 0.001$ ) and with a free breast pump OR 1.84  
54  
55  
56  
57  
58  
59  
60

1  
2  
3 (95% CI 1.36, 2.49;  $p = <0.001$ ), but not with provider incentives for meeting breastfeeding  
4 targets, when compared to those with children that had not been breastfed.  
5  
6

7  
8 Where respondents did not disagree with providing shopping vouchers as an incentive, up to  
9 £40 per month vouchers for behaviour change were acceptable (>85%) (Table 4), for both  
10 smoking cessation and breastfeeding. For smoking cessation in pregnancy, being a current  
11 smoker who has tried to stop (compared to never smoked), or having a child previously  
12 breastfed (compared to no breastfed children) was correlated with a higher value of  
13 shopping voucher (Web 4, Table 15). For breastfeeding, having a child previously breastfed  
14 (compared to no breastfed children) was correlated with an increased value of shopping  
15 voucher (Web 4, Table 17).  
16  
17  
18  
19

20  
21 Universal provision rather than targeting low income women was preferred by 364 (55%) of  
22 the 660 who did not disagree with vouchers for smoking cessation in pregnancy, compared  
23 with 296 (44.9%) who thought that vouchers should be targeted at low income women only.  
24 Agreement with universal provision of vouchers for breastfeeding was similar: 367 (52.3%)  
25 compared to 330 (47.4%) thought that incentives should be provided to low income women  
26 only. Disagreement with vouchers being given to low income women only was associated  
27 with being a woman (Web 4, Tables 16 and 18) but this was only significant for  
28 breastfeeding.  
29  
30  
31  
32  
33

### 34 35 **Discussion**

36 In this representative UK sample, public opinion regarding the acceptability of incentives for  
37 smoking cessation in pregnancy and breastfeeding was mixed. Being of child-bearing age  
38 (44 or under), and therefore a representative of the target population for this behaviour  
39 change strategy, was the only independent predictor of agreement with all seven incentive  
40 strategies. Of concern, women were significantly more likely to disagree with any of the  
41 shopping voucher incentive strategies compared to men. General public respondents with  
42 lower educational level were more likely to disagree with any voucher incentives to women  
43 for smoking cessation, or with a free breast pump. Agreement appears to be strongest in  
44 non-white ethnic groups. As reported by others,<sup>1</sup> people with direct experiences of  
45 attempting the target behaviours were more likely to agree with incentives.  
46  
47  
48  
49  
50  
51  
52

53 This is the largest survey of public attitudes to incentive provision aiming to change lifestyle  
54 behaviours and was conducted by an independent company with an international reputation  
55 for conducting surveys of this type. Our multi-disciplinary mixed methods approach to survey  
56 design and investigating two behaviours concurrently, with an innovative participatory  
57  
58  
59  
60

1  
2  
3 approach to incorporating service user perspectives through co-applicant mother and baby  
4 groups located in disadvantaged areas, are novel.<sup>16,18</sup> Important limitations relate to the  
5 unknown generalisability to other countries; non-responder and selection biases; and other  
6 potential confounders. The framing effects observed by randomising question order are  
7 important and further unknown framing effects could be present. In particular the introduction  
8 contained a stronger statement about the evidence for incentives changing smoking  
9 behaviour than for breastfeeding, as is consistent with current evidence<sup>9-11,14</sup> and evidence of  
10 effectiveness has been shown to impact on acceptability.<sup>3</sup>  
11  
12  
13  
14  
15

16  
17 The implications of our findings for efforts to reduce health inequalities are important. The  
18 disagreement with incentive strategies amongst those with lower educational level, which is  
19 considered the strongest predictor of disadvantage,<sup>6</sup> is unexpected and a concern as  
20 addressing health inequalities is a government priority. Smoking in pregnancy and not  
21 breastfeeding are highest amongst the less educated, the younger aged and white British  
22 women.<sup>7</sup> This data adds to reports of poor reach of incentive interventions, particularly to the  
23 most marginalised individuals.<sup>12,13</sup> Universal incentives were preferred to incentives targeted  
24 at low income women, with concerns about unintended consequences such as stigma and  
25 value judgments raised in linked qualitative data.<sup>16</sup> Differential uptake across educational  
26 groups and the potential for health inequalities to increase is a concern, as noted for lifestyle  
27 behaviour change interventions.<sup>19</sup> Any assumption that incentives might redistribute  
28 resources and/or help to reduce health inequalities requires further testing.  
29  
30  
31  
32  
33  
34  
35

36  
37 Women's disagreement with incentive strategies is particularly problematic due to the onus  
38 currently placed on women by health services and governments to change their health  
39 related behaviours. Some understanding of women's disagreement with shopping voucher  
40 incentives for individual or household behaviour change, which may seem counter-intuitive,  
41 is revealed in narratives of blame, pressure and stigma.<sup>16, 20-21</sup> In addition, psychological  
42 theory suggests that providing extrinsic motivation through financial incentives alone might  
43 be insufficient and meet with resistance, with intrinsic motivation required for more sustained  
44 behaviour change.<sup>23,24</sup> Qualitative data from this study highlights that the real life barriers  
45 and facilitators to living healthy lives need to be addressed concurrently with incentive  
46 interventions to optimise the likelihood of effectiveness.<sup>16</sup> For example, current smokers who  
47 reported failed attempts to stop were more likely to agree with shopping voucher incentives  
48 for a smoke-free home, but disagree with providing vouchers if the mother continues to  
49 abstain from smoking after birth. This fits with the evidence on relapse being associated with  
50 whether the partner and/or social network of a pregnant woman smokes.<sup>22</sup> Similarly, linked  
51 qualitative data suggest that a free breast pump is perceived to address more intrinsic and  
52  
53  
54  
55  
56  
57  
58  
59  
60

1  
2  
3 extrinsic barriers to continued breastfeeding than shopping vouchers, such as overcoming  
4 embarrassment with performing in public; resuming social lives; sharing the feeding-bonding  
5 experience with partners and relieving the mother as the sole supplier on demand.<sup>16</sup>  
6  
7 However, breast pumps are an uncertain proxy outcome as the relationship between  
8 characteristics, use and feeding outcomes are uncertain.<sup>25</sup>  
9  
10

11  
12 Robust randomised controlled trials reporting reach, impact on health inequalities, ethnic  
13 groups, experience outcomes and any unintended consequences, in addition to the target  
14 behaviours, are required prior to any implementation or introduction of policy decisions  
15 around incentive interventions for smoking cessation in pregnancy, or breastfeeding.  
16  
17  
18

19  
20 **Acknowledgements:**

21 We would like to thank our co-applicants and research team: Mastrick Café Crèche,  
22 Aberdeen and St Cuthbert's and Palatine Children's Centre, Blackpool. Shelley Farrar and  
23 Nicola Crossland contributed to the survey design. Grant co-applicants Professor Fiona  
24 Dykes, Professor David Tappin and Dr Falko Sniehotta for their collaboration and input to  
25 the overall BIBS study design. We would like to thank the members of the public, the  
26 women, families and staff from health services, local government, voluntary sector and other  
27 organisations, who generously provided their time by participating in the BIBS study. Other  
28 members of the BIBS study team, in particular, Fiona Stewart and Cynthia Fraser for  
29 providing guidance with literature searching and reference management; Lara Kemp for  
30 providing secretarial support.  
31  
32  
33  
34  
35  
36  
37  
38  
39  
40  
41  
42  
43  
44  
45  
46  
47  
48  
49  
50  
51  
52  
53  
54  
55  
56  
57  
58  
59  
60

### Conflicts of interest

All authors have completed the Unified Competing Interest form at [www.icmje.org/coi\\_disclosure.pdf](http://www.icmje.org/coi_disclosure.pdf) (available on request from the corresponding author) and declare that (1) no authors have support from any company for the submitted work; (2) no authors have relationships with companies that might have an interest in the submitted work in the previous 3 years; (3) their spouses, partners, or children have no financial relationships that may be relevant to the submitted work; and (4) LB has non-financial interests that may be relevant to the submitted work. Ipsos Mori were commissioned to work with the research team by the University of Aberdeen.

### Contributions

Pat Hoddinott wrote the first draft of this paper and led the BIBS study. All co-authors have contributed to the design, analysis and paper writing and meet the ICMJE criteria for authorship. Heather Morgan co-ordinated service user co-applicant mother and baby group involvement in Aberdeen; contributed to the survey design, piloting, analysis decisions and wrote the first draft of the results. Graeme MacLennan led the statistical analysis of the survey data and contributed to writing the methods and results sections. Gill Thomson co-ordinated service user co-applicant mother and baby group involvement in Blackpool and contributed to the survey design, piloting and reporting of the results. Linda Bauld contributed to the survey design and reporting of the results. Kate Sewel, Lorraine Murray and their colleagues at Ipsos MORI, contributed to the survey design, collected the survey data, and provided the data as an SPSS file for further analysis. Anne Ludbrook contributed to the survey design and, with Deokhee Yi, analysed the incentive value and targeting questions in the survey and reported these sections of the results. Marion Campbell provided methodological and statistical input to the survey design, analysis and reporting of results.

### Ethics approvals

Full ethical approval for this study, including service user involvement, was obtained from the North of Scotland Research Ethics Committee (NOSRES, reference number: 12/NS/0041, 12<sup>th</sup> April 2012) and the BUSH (Built & Natural Environment, Sport and Health) Ethics Committee, University of Central Lancashire (BUSH064, 8<sup>th</sup> May 2012).

### Sources of funding

This project was commissioned by the NIHR Health Technology Assessment Programme (10/31/02) and will be published in full in *Health Technology Assessment*. Further information including the protocol is available at:

1  
2  
3 <http://www.nets.nihr.ac.uk/projects/hta/103102>. This report presents independent research  
4 commissioned by the National Institute for Health Research (NIHR). The views and opinions  
5 expressed by authors in this publication are those of the authors and do not necessarily  
6 reflect those of the NHS, the NIHR, MRC, CCF, NETSCC, the HTA programme or the  
7 Department of Health  
8  
9

10 The Nursing, Midwifery and Allied Health Professions Research Unit, University of Stirling,  
11 the Health Services Research Unit, and Health Economics Research Unit, Institute of  
12 Applied Health Sciences, University of Aberdeen are all core-funded by the Chief Scientist  
13 Office of the Scottish Government Health and Social Care Directorates.  
14  
15  
16

### 17 18 **Transparency statement**

19 All authors are independent of the funding bodies, had full access to all of the data reported  
20 in this paper and take responsibility for the integrity of the data and the accuracy of the data  
21 analysis. PH took the decision to submit for publication and is the guarantor. She affirms that  
22 the manuscript is an honest, accurate, and transparent account of the study being reported;  
23 and that no important aspects of the study have been omitted.  
24  
25  
26  
27

### 28 29 **Data sharing**

30 The full dataset is available from the corresponding author: p.m.hoddinott@stir.ac.uk.  
31  
32  
33  
34

### 35 36 **References**

- 37 1. Diepeveen S, Ling T, Suhrcke M, Roland M, Marteau T. Public acceptability of  
38 government intervention to change health-related behaviours: A systematic review and  
39 narrative synthesis. *BMC Public Health*. 2013;13(1):756.  
40
- 41 2. Park JD, Mitra N, Asch DA. Public opinion about financial incentives for smoking  
42 cessation. *Prev Med*. 2012;55, Supplement:S41-S45.  
43
- 44 3. Promberger M, Dolan P, Marteau T. "Pay them if it works": Discrete choice experiments  
45 on the acceptability of financial incentives to change health related behaviour. *Soc Sci Med*.  
46 2012;75(12):2509-2514.  
47
- 48 4. Thomson G, Dykes F, Hurley M, Hoddinott P. Incentives as connectors: Insights into a  
49 breastfeeding incentive intervention in a disadvantaged area of North-West England. *BMC*  
50 *Pregnancy and Childbirth*. 2012;12(1):22.  
51
- 52 5. Jeffery RW. Financial incentives and weight control. *Prev Med*. 2012;55, Supplement:S61-  
53 S67.  
54  
55  
56  
57  
58  
59  
60



- 1  
2  
3 6. Marmot M. *Fair society, healthy lives: The Marmot review. Strategic review of health*  
4 *inequalities in England post 2010*. [accessed March 2014]. Available from URL:  
5 <http://www.marmotreview.org/>.  
6  
7  
8 7. McAndrew F, Thompson J, Fellows L, Large A, Speed M, Renfrew MJ. *Infant feeding*  
9 *survey 2010*. [accessed March 2014]. Available from URL:  
10 <http://www.hscic.gov.uk/catalogue/PUB08694/ifs-uk-2010-sum.pdf>  
11  
12  
13 8. Buck D, Frosini F. *Clustering of unhealthy behaviours over time: Implications for policy*  
14 *and practice*. London: The Kings Fund; 2012..  
15  
16  
17 9. Chamberlain C, O'Mara-Eves A, Oliver S, et al. Psychosocial interventions for supporting  
18 women to stop smoking in pregnancy. *Cochrane Database of Syst Rev*,  
19 2013;Issue10:CD001055.  
20  
21  
22 10. Higgins ST, Washio Y, Heil SH, et al. Financial incentives for smoking cessation among  
23 pregnant and newly postpartum women. *Prev Med*. 2012;55, Supplement(0):S33-S40.  
24  
25  
26 11. Hoddinott P, Hislop J, Morgan H, et al. Incentive interventions for smoking cessation in  
27 pregnancy: A mixed methods evidence synthesis. *The Lancet*. 2012;380, Supplement  
28 3(0):S48.  
29  
30  
31 12. Radley A, Ballard P, Eadie D, MacAskill S, Donnelly L, Tappin D. Give it up for baby:  
32 Outcomes and factors influencing uptake of a pilot smoking cessation incentive scheme for  
33 pregnant women. *BMC Public Health*. 2013;13(1):343.  
34  
35  
36 13. Schmidt H, Voigt K, Wikler D. Carrots, sticks, and health care reform — problems with  
37 wellness incentives. *N Engl J Med*. 2010;362(2):e3.  
38  
39  
40 14. Renfrew MJ, McCormick FM, Wade A, Quinn B, Dowswell T. Support for healthy  
41 breastfeeding mothers with healthy term babies. *Cochrane Database of Syst Rev*.  
42 2012;Issue 5:CD001141  
43  
44  
45 15. Hoddinott P, Seyara R, Marais D. Global evidence synthesis and UK idiosyncrasy: Why  
46 have recent UK trials had no significant effects on breastfeeding rates? *Maternal & Child*  
47 *Nutrition*. 2011;7:221-227.  
48  
49  
50 16. HTA - 10/31/02. *BIBS: Benefits of incentives for breastfeeding and smoking cessation: A*  
51 *platform study for a trial*. [accessed March 2014]. Available from URL  
52 <http://www.nets.nihr.ac.uk/projects/hta/103102>.  
53  
54  
55 17. Eunson J, Murray L. *The acceptability of carrots*. Edinburgh: Ipsos MORI Scotland; 2012  
56 [accessed March 2014]. Available from URL: [http://www.ipsos-](http://www.ipsos-mori.com/newsevents/ca/1233/The-acceptability-of-carrots.aspx)  
57 [mori.com/newsevents/ca/1233/The-acceptability-of-carrots.aspx](http://www.ipsos-mori.com/newsevents/ca/1233/The-acceptability-of-carrots.aspx).  
58  
59  
60



- 1  
2  
3 18. Morgan H, **Hoddinott P**, Thomson G, Crossland N, Dykes F, McCann S, Campbell MK.  
4 Service user groups as co-applicants on a platform study for a trial. *Trials*: 2013, 14(Suppl  
5 1):O35.  
6  
7  
8 19. Jepson R, Harris F, Platt S, Tannahill C. The effectiveness of interventions to change six  
9 health behaviours: A review of reviews. *BMC Public Health*. 2010;10(1):538.  
10  
11 20. Ingall G, Cropley M. Exploring the barriers of quitting smoking during pregnancy: A  
12 systematic review of qualitative studies. *Women and Birth*. 2010;23(2):45-52.  
13  
14 21. Hoddinott P, Craig LCA, Britten J, McInnes RM. A serial qualitative interview study of  
15 infant feeding experiences: Idealism meets realism. *BMJ Open* 2012;2:e000504.  
16  
17 22. Graham H, Sowden A, Flemming K, Heirs M, Fox D. *Using qualitative research to inform*  
18 *interventions to reduce smoking in pregnancy in England: A systematic review of qualitative*  
19 *studies*. Public Health Research Consortium; 2012.  
20  
21 23. Frey B. *Not just for the money. An economic theory of personal motivation*. Brookfield  
22 VT: Edward Elgar Publishing; 1997.  
23  
24 24. Deci EL, Koestner R, Ryan RM. A meta-analytic review of experiments examining the  
25 effects of extrinsic rewards on intrinsic motivation. *Psychological bulletin*. 1999;125:627-668.  
26  
27 25. Becker GE, Cooney F, Smith HA. Methods of milk expression for lactating women.  
28 *Cochrane Database Syst Rev* 2011;Issue 12:CD006170.  
29  
30  
31  
32  
33  
34  
35  
36  
37  
38  
39  
40  
41  
42  
43  
44  
45  
46  
47  
48  
49  
50  
51  
52  
53  
54  
55  
56  
57  
58  
59  
60

**Panel 1. Definition of an incentive**

Incentives include financial (positive or negative) and non-financial tangible incentives or rewards. This includes free or reduced cost items that have a monetary value or an exchange value, like refreshments, baby products or services like child care or ironing. The definition excludes intangible incentives such as supportive, motivational or persuasive relationships with professionals or peers. Incentives may be delivered directly or indirectly at local, regional or national level by organisations.

**Panel 2. Shortlist of seven promising incentive strategies**

1. Shopping vouchers for women who prove that they have stopped smoking during pregnancy
2. Shopping vouchers for a woman for two months after the birth of her baby if she proves that she is still not smoking
3. Shopping vouchers for a woman for two months after the birth of her baby if she never lets anyone smoke in her home
4. Shopping vouchers for women who prove that they are breastfeeding for the first 6 months after birth
5. A breast pump costing around £40 provided for free by the health service
6. Additional funding for local health services if they reach targets for the number of women who prove that they have stopped smoking during pregnancy
7. Additional funding for local health services if they reach targets for the number of women who prove that they are breastfeeding

**Table 1. Characteristics of the general public sample (n=1144)**

| Variable           | Categories                                | Sample (%) |
|--------------------|-------------------------------------------|------------|
| Sex                | Male                                      | 540 (47.2) |
|                    | Female                                    | 604 (52.7) |
| Age                | 18-24                                     | 170 (14.9) |
|                    | 25-34                                     | 175 (15.3) |
|                    | 35-44                                     | 181 (15.8) |
|                    | 45-54                                     | 159 (13.9) |
|                    | 55-59                                     | 72 (6.3)   |
|                    | 60-64                                     | 94 (8.2)   |
| Ethnicity          | 65<                                       | 293 (25.6) |
|                    | White                                     | 985 (86.1) |
|                    | BME                                       | 151 (13.2) |
|                    | Refused to answer                         | 8 (0.7)    |
|                    | <i>White British</i>                      | 914 (79.9) |
|                    | <i>White Irish</i>                        | 11 (1.0)   |
|                    | <i>White Gypsy/Traveller</i>              | -          |
|                    | <i>White Other</i>                        | 60 (5.2)   |
|                    | <i>Mixed W/B Caribbean</i>                | 3 (0.3)    |
|                    | <i>Mixed W/B African</i>                  | 1 (<0.1)   |
|                    | <i>Mixed White and Asian</i>              | 3 (0.3)    |
|                    | <i>Mixed Other</i>                        | 2 (0.2)    |
|                    | <i>Asian Indian</i>                       | 19 (1.7)   |
|                    | <i>Asian Pakistani</i>                    | 47 (4.1)   |
|                    | <i>Asian Bangladeshi</i>                  | 12 (1.1)   |
|                    | <i>Asian Chinese</i>                      | 7 (0.6)    |
| <i>Asian Other</i> | 13 (1.1)                                  |            |
| Smoking status     | <i>Black African</i>                      | 26 (2.3)   |
|                    | <i>Black Caribbean</i>                    | 7 (0.6)    |
|                    | <i>Black Other</i>                        | 2 (0.2)    |
|                    | <i>Arab</i>                               | 4 (0.4)    |
|                    | <i>Other</i>                              | 5 (0.4)    |
|                    | <i>Refused</i>                            | 8 (0.7)    |
|                    | Never smoked                              | 573 (50.1) |
|                    | Current smoker, tried to stop smoking     | 175 (15.3) |
| Any children       | Current smoker, not tried to stop smoking | 63 (5.5)   |
|                    | Ex-smoker                                 | 281 (24.6) |
| Breastfeeding      | Declined to answer                        | 52 (4.6)   |
|                    | Yes                                       | 742 (64.9) |
| Education          | No                                        | 402 (35.1) |
|                    | Any children breastfed                    | 512 (47.3) |
|                    | No children breastfed                     | 632 (52.5) |
| Social grade       | GCSE/O-level/CSE/NVQ                      | 342 (29.9) |
|                    | A-level or equivalent                     | 193 (16.9) |
|                    | Degree/Masters/PhD                        | 295 (25.9) |
|                    | No formal qualifications                  | 197 (17.2) |
| Survey region      | Other/Don't know/ Still studying          | 117 (10.2) |
|                    | A                                         | 36 (3.2)   |
|                    | B                                         | 203 (17.7) |
|                    | C1                                        | 370 (32.3) |
|                    | C2                                        | 236 (20.6) |
|                    | D                                         | 162 (14.2) |
| Survey region      | E                                         | 137 (12.0) |
|                    | North                                     | 77 (6.7)   |
|                    | North West                                | 142 (12.4) |
|                    | Yorks & Humberside                        | 104 (9.1)  |
|                    | West Midlands                             | 109 (6.5)  |
|                    | East Midlands                             | 66 (5.8)   |
|                    | East Anglia                               | 41 (3.6)   |
|                    | South West                                | 81 (7.1)   |
|                    | South East                                | 200 (17.5) |
|                    | Greater London                            | 149 (13)   |
| Wales              | 66 (5.8)                                  |            |
| Scotland           | 109 (9.3)                                 |            |

Figure 1. Bar charts of general public agreement with the shortlist of incentive strategies

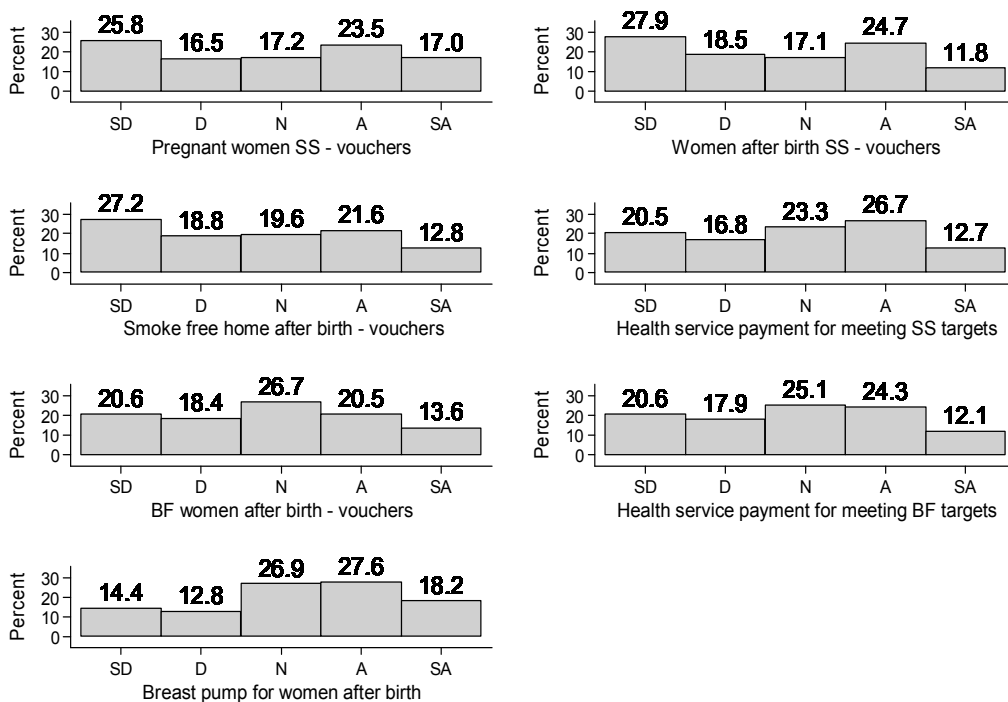

SD: Strongly disagree  
 D: Disagree  
 N: Neither agree nor disagree  
 A: Agree  
 SA: Strongly agree  
 BF: Breastfeeding  
 SS: Stop smoking

Review only

**Table 2. Summary of general public agreement with seven incentive strategies**

| Incentive strategy                                                                                                                                   | % Disagree | % Neither | % Agree | Mean |
|------------------------------------------------------------------------------------------------------------------------------------------------------|------------|-----------|---------|------|
| Shopping vouchers for women who prove that they have stopped smoking during pregnancy                                                                | 42.3       | 17.2      | 40.5    | 2.9  |
| Shopping vouchers for a woman for two months after the birth of her baby if she proves that she is still not smoking                                 | 46.4       | 17.3      | 36.5    | 2.7  |
| Shopping vouchers for a woman for two months after the birth of her baby if she never lets anyone smoke in her home                                  | 46.0       | 19.6      | 34.4    | 2.7  |
| Shopping vouchers for women who prove that they are breastfeeding for the first 6 months after birth                                                 | 39.1       | 26.8      | 34.2    | 2.9  |
| A breast pump costing around £40 provided for free on the NHS                                                                                        | 27.8       | 27.0      | 45.8    | 3.2  |
| Additional funding for local health services if they reach targets for the number of women who prove that they have stopped smoking during pregnancy | 37.2       | 23.3      | 39.4    | 2.9  |
| Additional funding for local health services if they reach targets for the number of women who prove that they are breastfeeding                     | 38.6       | 25.1      | 36.4    | 2.9  |

Table 3. Summary of the independent predictors of general public agreement and disagreement with incentive strategies

|                                                                                                                      | Age ≤ 44            | Female              | Lower education level | Social grade C or below           | Non-white ethnicity | Current smokers who have attempted to stop | Children breastfed  |
|----------------------------------------------------------------------------------------------------------------------|---------------------|---------------------|-----------------------|-----------------------------------|---------------------|--------------------------------------------|---------------------|
| Shopping vouchers for women who prove that they have stopped smoking during pregnancy                                | $1.5 \leq OR < 2.0$ | $0.5 \leq OR < 1.0$ | $0.5 \leq OR < 1.0$   | $1.5 \leq OR < 2.0$<br>(Grade E)  | $1.0 \leq OR < 1.5$ | $1.5 \leq OR < 2.0$                        |                     |
| Shopping vouchers for a woman for two months after the birth of her baby if she proves that she is still not smoking | $1.5 \leq OR < 2.0$ | $0.5 \leq OR < 1.0$ | $0.5 \leq OR < 1.0$   | $1.5 \leq OR < 2.0$<br>(Grade C2) |                     |                                            |                     |
| Shopping vouchers for a woman for two months after the birth of her baby if she never lets anyone smoke in her home  | $1.5 \leq OR < 2.0$ | $0.5 \leq OR < 1.0$ | $0.5 \leq OR < 1.0$   |                                   | $1.0 \leq OR < 1.5$ | $1.0 \leq OR < 1.5$                        |                     |
| Shopping vouchers for women who prove that they are breastfeeding for the first 6 months after birth                 | $1.5 \leq OR < 2.0$ | $0.5 \leq OR < 1.0$ |                       |                                   | $OR \geq 2.0$       |                                            | $1.5 \leq OR < 2.0$ |
| A breast pump costing around £40 provided for free on the NHS                                                        | $1.5 \leq OR < 2.0$ |                     | $0.5 \leq OR < 1.0$   | $1.5 \leq OR < 2.0$<br>(Grade E)  |                     |                                            | $1.5 \leq OR < 2.0$ |
| Additional funding for local health services if they reach targets stopping smoking during pregnancy                 | $OR \geq 2.0$       |                     | $0.5 \leq OR < 1.0$   | $0.5 \leq OR < 1.0$<br>(Grade C1) |                     |                                            |                     |
| Additional funding for local health services if they reach targets for breastfeeding                                 | $1.5 \leq OR < 2$   |                     |                       |                                   | $OR \geq 2.0$       |                                            |                     |

**Table 4. Highest acceptable value of shopping voucher for women who stop smoking during pregnancy or are breastfeeding**

| Value | Smoking in pregnancy |         | Breastfeeding        |         |
|-------|----------------------|---------|----------------------|---------|
|       | Number<br>(N = 660*) | Percent | Number<br>(N = 697*) | Percent |
| £2    | 116                  | 17.6    | 146                  | 20.95   |
| £10   | 146                  | 22.1    | 150                  | 21.52   |
| £20   | 193                  | 29.2    | 199                  | 28.55   |
| £40   | 115                  | 17.4    | 110                  | 15.78   |
| £60   | 36                   | 5.5     | 36                   | 5.16    |
| £80   | 54                   | 8.2     | 56                   | 8.03    |

\* Respondents from the 1144 UK public participants who strongly agreed, agreed or neither agreed nor disagreed with shopping vouchers incentives



**WEB 1 MORI survey of the general public**LIFESTYLE SURVEY – CS MODULE CAPIBUS WEEK 12

(SAMPLE = ADULTS AGED 18+)

(COMPUTING, PLEASE ROTATE SO THAT ½ SAMPLE ARE ASKED SMOKING QUESTIONS (SMOKING INTRO PLUS CS01 – 05) FIRST AND ½ SAMPLE ARE ASKED BREASTFEEDING QUESTIONS (BREASTFEEDING INTRO PLUS CS06 – CS10) FIRST)

(COMPUTING: PLEASE ENSURE ALL DK, REF AND NULL ARE TREATED AS HIDDEN RESPONSES)

INTERVIEWER THIS SECTION DOES NOT HAVE SHOWCARDS. ON SCREEN INSTRUCTIONS WILL INDICATE WHEN TO SHOW AND WHEN NOT TO SHOW SCREEN TO THE RESPONDENT. PLEASE NOTE: THERE MAY BE QUESTIONS THAT ALLOW DON'T KNOW, NONE OF THESE OR REFUSED. PLEASE TYPE DK FOR DON'T KNOW, REF FOR REFUSED AND NULL FOR NONE OF THESE

(New Screen)

INTERVIEWER: PLEASE SHOW SCREEN UNTIL OTHERWISE INSTRUCTED.

I would now like to ask you some questions about smoking during pregnancy...

CS01. Stopping smoking in pregnancy benefits the health of the baby and the mother. Research shows that providing shopping vouchers to women who prove that they have stopped smoking during pregnancy increases the number of women who stop. While some people feel that providing vouchers is appropriate, others feel that it is wrong or unfair.

Do you agree or disagree that shopping vouchers should be provided to women who prove that they have stopped smoking during pregnancy?

(SINGLE CODE; REVERSE ORDER BETWEEN INTERVIEWS)

Strongly agree

Tend to agree

Neither agree nor disagree

Tend to disagree

Strongly disagree

IF CODE STRONGLY AGREE, TEND TO AGREE OR NEITHER AGREE NOR DISAGREE AT CS01, ASK:

CS02. What is the highest amount of shopping voucher you think it would be acceptable to provide a woman who proves that she has stopped smoking during pregnancy?

(SINGLE CODE; REVERSE ORDER BETWEEN INTERVIEWS)

- A. £2 per month
- B. £10 per month
- C. £20 per month
- D. £40 per month
- E. £60 per month
- F. £80 per month

IF CODE STRONGLY AGREE, TEND TO AGREE OR NEITHER AGREE NOR DISAGREE AT CS01, ASK:

CS03. Do you think that it is acceptable to provide shopping vouchers to women who prove that they have stopped smoking during pregnancy, regardless of their income, or only to women on low incomes?

(SINGLE CODE)

To all women, regardless of income

Only to women on low incomes

1  
2  
3 ASK ALL

4 CS04. Some women start smoking again after the birth of their baby, particularly if their partner or  
5 someone at home smokes. Please tell me whether you agree or disagree with each of the following  
6 statements.

7 Statements:

8 It is acceptable to provide shopping vouchers to a woman for two months after the birth of her baby if  
9 she proves that she is still not smoking

10 It is acceptable to provide shopping vouchers to a woman for two months after the birth of her baby if  
11 she never lets anyone smoke in her home

12 (SINGLE CODE FOR EACH STATEMENT. REVERSE ORDER OF LIST BETWEEN  
13 INTERVIEWS.)

14  
15 Precode list:

16 Strongly agree

17 Tend to agree

18 Neither agree nor disagree

19 Tend to disagree

20 Strongly disagree

21  
22 CS05. Do you agree or disagree that local health services should receive additional funding if they  
23 reach targets for the number of women who prove that they have stopped smoking during pregnancy?  
24 (SINGLE CODE. REVERSE ORDER OF LIST BETWEEN INTERVIEWS.)

25 Precode list:

26 Strongly agree

27 Tend to agree

28 Neither agree nor disagree

29 Tend to disagree

30 Strongly disagree

31 I would now like to ask you some questions about breastfeeding...

32  
33 CS06. Breastfeeding benefits the health of the baby and the mother. While some people feel it is  
34 appropriate to provide shopping vouchers to encourage breastfeeding, other people feel it is wrong or  
35 unfair.

36 Do you agree or disagree that shopping vouchers should be provided to women who breastfeed for the  
37 first six months after the birth of their child?

38 (SINGLE CODE. REVERSE ORDER OF LIST BETWEEN INTERVIEWS.)

39 Precode list:

40 Strongly agree

41 Tend to agree

42 Neither agree nor disagree

43 Tend to disagree

44 Strongly disagree

45  
46 IF CODE STRONGLY AGREE, TEND TO AGREE OR NEITHER AGREE NOR DISAGREE AT  
47 CS06, ASK:

48 CS07. What is the highest amount of shopping voucher you would consider acceptable for women who  
49 breastfeed? (SINGLE CODE; REVERSE ORDER BETWEEN INTERVIEWS)

50  
51 A. £2 per month

52 B. £10 per month

53 C. £20 per month

54 D. £40 per month

55 E. £60 per month

56 F. £80 per month

1  
2  
3 IF CODE STRONGLY AGREE, TEND TO AGREE OR NEITHER AGREE NOR DISAGREE AT  
4 CS06, ASK:

5  
6 CS08. Do you agree or disagree that shopping vouchers should be provided to all women who  
7 breastfeed, regardless of their income, or only to women on low incomes?  
8 (SINGLE CODE)

9 To all women, regardless of income  
10 Only to women on low incomes

11  
12 ASK ALL

13 CS09. Do you agree or disagree that local health services should receive additional funding if they  
14 reach targets for the number of women who breastfeed?  
15 (SINGLE CODE. REVERSE ORDER OF LIST BETWEEN INTERVIEWS.)

16  
17 Precode list:

18 Strongly agree  
19 Tend to agree  
20 Neither agree nor disagree  
21 Tend to disagree  
22 Strongly disagree

23  
24 NEW SCREEN

25 INTERVIEWER: THE WORDING OF THE NEXT QUESTION IS A BIT SENSITIVE, ABOUT  
26 BREASTFEEDING. PLEASE COULD YOU TURN THE NEXT SCREEN TO THE RESPONDENT  
27 AND ASK THEM TO READ THE QUESTION THEMSELVES. THEY CAN JUST GIVE YOU  
28 THEIR ANSWER FOR YOU TO INPUT.

29  
30 ASK ALL

31 CS10. Some women who breastfeed like to express milk. This allows babies to receive breast milk  
32 when mother and baby are apart.  
33 To express milk, some women find a breast pump useful. Women can buy breast pumps ranging from  
34 £20 to over £100. Do you agree or disagree that a breast pump costing around £40 should be available  
35 for free on the NHS, to help women to continue breastfeeding?  
36 (SINGLE CODE. REVERSE ORDER OF LIST BETWEEN INTERVIEWS.)

37  
38 Precode list:

39 Strongly agree  
40 Tend to agree  
41 Neither agree nor disagree  
42 Tend to disagree  
43 Strongly disagree

44  
45 TO FIT WITH OMNIBUS DEMOG QUESTIONS, IF NOT RECORDED ANY CHILDREN IN  
46 OMNIBUS DEMOG QUESTIONS, ASK...

47 CS11. Do you have any children? Please include any children who are grown up now, and any children  
48 who do not live with you.  
49 (SINGLE CODE)

50 Yes  
51 No

52  
53 IF HAVE CHILDREN (FROM OMNIBUS DEMOGS OR CS11), ASK:

54 CS12. Have any of your children ever been breastfed or received breast milk, even if only for a day or  
55 two?  
56 (SINGLE CODE, ALLOW DK AND REF)

57 Yes  
58 No

1  
2  
3  
4  
5  
6  
7  
8  
9  
10  
11  
12  
13  
14  
15  
16  
17  
18  
19  
20  
21  
22  
23  
24  
25  
26  
27  
28  
29  
30  
31  
32  
33  
34  
35  
36  
37  
38  
39  
40  
41  
42  
43  
44  
45  
46  
47  
48  
49  
50  
51  
52  
53  
54  
55  
56  
57  
58  
59  
60

ASK ALL

CS13. Do you currently smoke or have you ever smoked?

- Yes, I currently smoke every day
- Yes, I currently smoke, but not every day
- Yes, I used to smoke but have quit
- No, I have never smoked
- I prefer not to answer

IF CODE 1 OR 2 AT CS13:

CS14. Have you ever tried to stop smoking?  
(SINGLE CODE)

- Yes
- No

CLOSE

For peer review only

## Web 2. Ipsos MORI Computer Assisted Personal Interviewing (CAPI)

### background

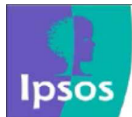

Ipsos MORI  
Global Omnibus Services

#### Background to Capibus

Ipsos MORI's weekly face-to-face omnibus, *Capibus*, is well-established; it was launched in 1992 and was the **first omnibus** of its kind to use 'computer assisted personal interviewing' (CAPI) to administer the questionnaire. This new approach instantly improved the quality and accuracy of the information collected and has become a quality standard in the omnibus industry worldwide.

*Capibus* is run every week with fieldwork lasting one week in total. The length of time allocated to complete Ipsos MORI's omnibus, combined with the Capibus interviewing style of completing the survey **in home** instead of the on the doorstep, or in a hall, ensures that interviewers spend time with the respondents, building a rapport. This in turn engages respondents and fundamentally improves the quality of responses.

The key advantages that Capibus has over other face-to-face omnibus surveys are available in Britain is the high quality sample design which incorporates a range of variables to ensure a robust, representative and consistent sample is achieved on a weekly basis. Factored in to the design is the larger number of sampling points to underpin coverage, the week's fieldwork allocated to the interviewing period and the interviewing style. Our demographics are also designed to enhance any research required by both our public and private sector clients - to do this we are pleased to be able to offer a comprehensive list of more than 30 demographics free of charge.

Capibus therefore provides you with **considerable flexibility** and means that we have no problem whatsoever in running tracker questions when required nor ad hoc needs as and when they may potentially arise.

#### The Sample

Capibus uses a unique and rigorous sampling method - a controlled form of random location sampling (known as 'random locale', a dual stage sampling design). Ipsos MORI uses a control method applied to field region and sub-region over a robust number of sample points (typically 155-180) to ensure we get a good geographical spread. We then set our interviewer quotas for sex, age, working status and tenure to ensure our sample is nationally representative - we use the CACI ACORN geo-demographic system in the selection process.

The use of ACORN ensures all types of area are fully represented and that selection of respondents is largely taken out of the hands of the interviewers, helping to eliminate any possible bias in the sample caused by interviewing people all with the same background.

On Ipsos MORI Face-to-Face Omnibus the interviewer is required to achieve interviews with respondents from a small set of homogenous streets, selected with probability proportional to population after stratification by ACORN characteristics and region

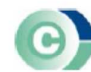



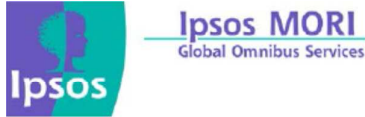

Because the sampling process is repeated every week, the Capibus sample is matched wave on wave, making it ideal for taking successive measurements on the same issue so there should be no concerns about running questions over a number of weeks.

Ipsos MORI's reputation has largely been built on our high-profile political and other opinion research over several decades. We have a strong image among the public, the media and other key opinion formers for conducting rigorous, independent research to high standards. As a result, we do believe that the Ipsos MORI name adds value to the research projects we conduct and assists significantly in maximising response rates and in the publication and dissemination of findings.

### Quality Plan

There are dozens of quality issues which make the difference between robust and unreliable data. These will have a direct impact on your ability to make the right decisions with confidence and to maximise the value of the resources you invest in the research you have in mind.

Ipsos MORI can guarantee securing robust data because we have to undergo stringent independent audits of our quality systems. As a result, we have a proven record on **quality and industry leadership** in this area. Our clients tell us that this is what sets us apart from other agencies and this is upheld by our record in terms of independent assessments.

MRS Company Partnership - In 2005 we were the first market research company to sign our organisation up to the rigours of the Market Research Society (MRS) Code. With the increasing importance of self-regulation, we wanted to be at the forefront of supporting the ethics and quality of our industry by applying the industry's professional Code to our entire organisation including all our interviewers. Previous to this, the Code applied solely to individuals who are members.

There are now over 350 MRS company partners who have followed our lead.

In 1996, MORI became **one of just two** companies to achieve accreditation under MRQSA (Market Research Quality Standards Association). This sets out minimum standards for each stage of a market research project and is designed to enable accredited companies to provide a superior service to their clients. We have passed a series of inspections since then with flying colours.

We are also a member of the Market Research Society and ESOMAR (the European Society for Opinion and Marketing Research), and as such, adhere to their Codes of Conduct.

Ipsos MORI was the **first company in the world to** gain ISO 20252:2006 accreditation - the international market research specific standard that supersedes BS 7911 / MRQSA and incorporates IQCS (Interviewer Quality Control Scheme); it covers the five stages of a Market Research project.

ISO 27001:2005 - International standard for information security designed to ensure the selection of adequate and proportionate security controls. Ipsos MORI was the **first research company in the UK** to be awarded this in August 2008.

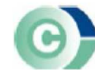

**Web 3 Framing effects in the MORI survey**

| Variable                                      | Topic covered first | SD         | D            | N          | A          | SA         |
|-----------------------------------------------|---------------------|------------|--------------|------------|------------|------------|
| Pregnant women SC – vouchers                  | Smoking             | 154 (26.3) | 94 (16.0)    | 103 (17.6) | 131 (22.4) | 104 (17.7) |
|                                               | Breastfeeding       | 141 (25.3) | 95 (17.0)    | 94 (16.8)  | 138 (24.7) | 90 (16.1)  |
|                                               | OR (95%CI) p value  | 1.00       | (0.82, 1.23) | 0.98       |            |            |
| Women after birth SC – vouchers               | Smoking             | 167 (28.5) | 113 (19.3)   | 98 (16.7)  | 135 (23.0) | 73 (12.5)  |
|                                               | Breastfeeding       | 152 (27.2) | 99 (17.7)    | 98 (17.6)  | 147 (26.3) | 62 (11.1)  |
|                                               | OR (95%CI; p value) | 1.06       | (0.86, 1.31) | 0.57       |            |            |
| Smoke free home after birth – vouchers        | Smoking             | 162 (27.6) | 113 (19.3)   | 113 (19.3) | 121 (20.6) | 77 (13.1)  |
|                                               | Breastfeeding       | 149 (26.7) | 102 (18.3)   | 111 (19.9) | 126 (22.6) | 70 (12.5)  |
|                                               | OR (95%CI; p value) | 1.05       | (0.85, 1.29) | 0.65       |            |            |
| Health service payment for meeting SC targets | Smoking             | 127 (21.7) | 95 (16.2)    | 130 (22.2) | 155 (26.5) | 79 (13.5)  |
|                                               | Breastfeeding       | 107 (19.2) | 97 (17.4)    | 137 (24.6) | 151 (27.1) | 66 (11.8)  |
|                                               | OR (95%CI; p value) | 1.01       | (0.82, 1.24) | 0.93       |            |            |



1  
2  
3  
4  
5  
6  
7  
8  
9  
10  
11  
12  
13  
14  
15  
16  
17  
18  
19  
20  
21  
22  
23  
24  
25  
26  
27  
28  
29  
30  
31  
32  
33  
34  
35  
36  
37  
38  
39  
40  
41  
42  
43  
44  
45  
46  
47  
48  
49

| Variable                                      | Topic covered first | SD         | D            | N          | A          | SA         |
|-----------------------------------------------|---------------------|------------|--------------|------------|------------|------------|
| BF women after birth – vouchers               | Smoking             | 152 (25.9) | 134 (22.9)   | 138 (23.5) | 99 (16.9)  | 63 (10.8)  |
|                                               | Breastfeeding       | 84 (15.1)  | 77 (13.8)    | 168 (30.1) | 136 (24.4) | 93 (16.7)  |
|                                               | OR (95%CI; p value) | 2.00       | (1.61, 2.46) | <0.001     |            |            |
| Health service payment for meeting BF targets | Smoking             | 145 (24.7) | 113 (19.3)   | 134 (22.9) | 125 (21.3) | 69 (11.8)  |
|                                               | Breastfeeding       | 91 (16.3)  | 92 (16.5)    | 153 (27.4) | 153 (27.4) | 69 (12.4)  |
|                                               | OR (95%CI; p value) | 1.44       | (1.17, 1.77) | 0.001      |            |            |
| Breast pumps                                  | Smoking             | 105 (17.9) | 76 (13.0)    | 150 (25.6) | 157 (26.8) | 98 (16.7)  |
|                                               | Breastfeeding       | 60 (10.8)  | 71 (12.7)    | 158 (28.3) | 159 (28.5) | 110 (19.7) |
|                                               | OR (95%CI; p value) | 1.32       | (1.08, 1.62) | 0.008      |            |            |

Note: An odds ratio >1 indicates that respondents asked the about breastfeeding incentive first were more likely to agree than respondents asked about smoking cessation incentives first.

SC = smoking cessation; BF = breastfeeding

## Web 4. Detailed results tables

**Table 1** Response to “Shopping vouchers for women who prove that they have stopped smoking during pregnancy” by independent variables

| Variable                          | SD         | D          | N          | A          | SA         |
|-----------------------------------|------------|------------|------------|------------|------------|
| <b>Age category</b>               |            |            |            |            |            |
| 18 – 24                           | 30 (17.6)  | 34 (20.0)  | 34 (20.0)  | 48 (28.2)  | 24 (14.1)  |
| 25 – 34                           | 32 (18.3)  | 32 (18.3)  | 27 (15.4)  | 50 (28.6)  | 34 (19.4)  |
| 35 – 44                           | 31 (17.1)  | 29 (16.0)  | 33 (18.2)  | 46 (25.4)  | 42 (23.2)  |
| 45 – 54                           | 44 (27.7)  | 28 (17.6)  | 29 (18.2)  | 32 (20.1)  | 26 (16.4)  |
| 55 – 59                           | 23 (31.9)  | 13 (18.1)  | 12 (16.7)  | 16 (22.2)  | 8 (11.1)   |
| 60 – 64                           | 28 (29.8)  | 13 (13.8)  | 13 (13.8)  | 24 (25.5)  | 16 (17.0)  |
| 65+                               | 107 (36.5) | 40 (13.7)  | 49 (16.7)  | 53 (18.1)  | 44 (15.0)  |
| <b>Breastfeeding</b>              |            |            |            |            |            |
| Children not breastfed            | 154 (24.4) | 113 (17.9) | 135 (21.4) | 138 (21.8) | 92 (14.6)  |
| Children breastfed                | 141 (27.5) | 76 (14.8)  | 62 (12.1)  | 131 (25.6) | 102 (19.9) |
| <b>Children</b>                   |            |            |            |            |            |
| No children                       | 90 (22.4)  | 79 (19.7)  | 81 (20.1)  | 98 (24.4)  | 54 (13.4)  |
| Have children                     | 205 (27.6) | 110 (14.8) | 116 (15.6) | 171 (23.0) | 140 (18.9) |
| <b>Ethnicity</b>                  |            |            |            |            |            |
| White                             | 280 (28.4) | 163 (16.5) | 167 (17.0) | 212 (21.5) | 163 (16.5) |
| Other ethnicity                   | 15 (9.4)   | 26 (16.4)  | 30 (18.9)  | 57 (35.8)  | 31 (19.5)  |
| <b>Sex</b>                        |            |            |            |            |            |
| Male                              | 120 (22.2) | 83 (15.4)  | 106 (19.6) | 128 (23.7) | 103 (19.1) |
| Female                            | 175 (29.0) | 106 (17.5) | 91 (15.1)  | 141 (23.3) | 91 (15.1)  |
| <b>Education</b>                  |            |            |            |            |            |
| University                        | 65 (22.0)  | 46 (15.6)  | 44 (14.9)  | 77 (26.1)  | 63 (21.4)  |
| GCSE                              | 98 (28.7)  | 54 (15.8)  | 57 (16.7)  | 80 (23.4)  | 53 (15.5)  |
| A-level                           | 48 (24.9)  | 43 (22.3)  | 32 (16.6)  | 36 (18.7)  | 34 (17.6)  |
| No Formal qualification           | 59 (29.9)  | 24 (12.2)  | 47 (23.9)  | 45 (22.8)  | 22 (11.2)  |
| Other, still studying, don't know | 25 (21.4)  | 22 (18.8)  | 17 (14.5)  | 31 (26.5)  | 22 (18.8)  |

| Variable                     | SD         | D          | N         | A          | SA        |
|------------------------------|------------|------------|-----------|------------|-----------|
| <b>Social Grade</b>          |            |            |           |            |           |
| AB                           | 71 (29.7)  | 37 (15.5)  | 30 (12.6) | 59 (24.7)  | 42 (17.6) |
| C1                           | 103 (27.8) | 67 (18.1)  | 68 (18.4) | 73 (19.7)  | 59 (15.9) |
| C2                           | 57 (24.2)  | 38 (16.1)  | 44 (18.6) | 55 (23.3)  | 42 (17.8) |
| D                            | 40 (24.7)  | 29 (17.9)  | 28 (17.3) | 38 (23.5)  | 27 (16.7) |
| E                            | 24 (17.5)  | 18 (13.1)  | 27 (19.7) | 44 (32.1)  | 24 (17.5) |
| <b>Smoking Status</b>        |            |            |           |            |           |
| Never smoked                 | 147 (25.7) | 102 (17.8) | 97 (16.9) | 144 (25.1) | 83 (14.5) |
| Previous smoker              | 84 (29.9)  | 49 (17.4)  | 43 (15.3) | 64 (22.8)  | 41 (14.6) |
| Current (tried quitting)     | 38 (21.7)  | 22 (12.6)  | 31 (17.7) | 34 (19.4)  | 50 (28.6) |
| Current (not tried quitting) | 15 (23.8)  | 9 (14.3)   | 10 (15.9) | 16 (25.4)  | 13 (20.6) |
| Refused to answer            | 11 (21.2)  | 7 (13.5)   | 16 (30.8) | 11 (21.2)  | 7 (13.5)  |
| <b>Area</b>                  |            |            |           |            |           |
| North                        | 24 (31.2)  | 17 (22.1)  | 11 (14.3) | 10 (13.0)  | 15 (19.5) |
| North West                   | 19 (13.4)  | 25 (17.6)  | 38 (26.8) | 41 (28.9)  | 19 (13.4) |
| Yorks Hum                    | 40 (38.5)  | 11 (10.6)  | 13 (12.5) | 22 (21.2)  | 18 (17.3) |
| East Midlands                | 25 (22.9)  | 28 (25.7)  | 14 (12.8) | 29 (26.6)  | 13 (11.9) |
| West Midlands                | 22 (33.3)  | 10 (15.2)  | 12 (18.2) | 12 (18.2)  | 10 (15.2) |
| East Anglia                  | 10 (24.4)  | 6 (14.6)   | 5 (12.2)  | 10 (24.4)  | 10 (24.4) |
| South East                   | 20 (24.7)  | 9 (11.1)   | 17 (21.0) | 15 (18.5)  | 20 (24.7) |
| South West                   | 55 (27.5)  | 26 (13.0)  | 40 (20.0) | 47 (23.5)  | 32 (16.0) |
| London                       | 17 (11.4)  | 31 (20.8)  | 19 (12.8) | 59 (39.6)  | 23 (15.4) |
| Wales                        | 29 (43.9)  | 9 (13.6)   | 6 (9.1)   | 10 (15.2)  | 12 (18.2) |
| Scotland                     | 34 (31.2)  | 17 (15.6)  | 22 (20.2) | 14 (12.8)  | 22 (20.2) |

*SD = strongly disagree, D = disagree, N = neither agree nor disagree, A = agree, SA = strongly agree; cells are number (row percentages).*

**Table 2** Simple univariable and multiple ordered logit regression models for response to “Shopping vouchers for women who prove that they have stopped smoking during pregnancy”

| Variable                          | Simple regression model |              |         | Multiple regression model |              |         |
|-----------------------------------|-------------------------|--------------|---------|---------------------------|--------------|---------|
|                                   | OR                      | 95% CI       | P value | OR                        | 95% CI       | P value |
| <b>Age category</b>               |                         |              |         |                           |              |         |
| 18 - 24                           | 1.66                    | (1.19, 2.31) | 0.003   | 1.67                      | (1.10, 2.54) | 0.016   |
| 25 - 34                           | 1.92                    | (1.37, 2.69) | < 0.001 | 1.71                      | (1.17, 2.49) | 0.006   |
| 35 - 44                           | 2.15                    | (1.54, 3.00) | < 0.001 | 1.88                      | (1.30, 2.72) | 0.001   |
| 45 - 54                           | 1.29                    | (0.91, 1.82) | 0.16    | 1.27                      | (0.87, 1.84) | 0.21    |
| 55 - 59                           | 1.04                    | (0.66, 1.65) | 0.87    | 1.03                      | (0.63, 1.66) | 0.91    |
| 60 - 64                           | 1.39                    | (0.91, 2.12) | 0.13    | 1.42                      | (0.92, 2.20) | 0.12    |
| <b>Breastfeeding</b>              |                         |              |         |                           |              |         |
| Children breastfed                | 1.15                    | (0.94, 1.42) | 0.18    | 1.26                      | (0.94, 1.69) | 0.12    |
| <b>Children</b>                   |                         |              |         |                           |              |         |
| Have children                     | 1.05                    | (0.85, 1.30) | 0.67    | 1.17                      | (0.86, 1.59) | 0.33    |
| <b>Ethnicity</b>                  |                         |              |         |                           |              |         |
| Other ethnicity                   | 1.94                    | (1.46, 2.59) | < 0.001 | 1.42                      | (1.01, 1.99) | 0.047   |
| <b>Sex</b>                        |                         |              |         |                           |              |         |
| Female                            | 0.75                    | (0.61, 0.92) | 0.006   | 0.71                      | (0.57, 0.88) | 0.002   |
| <b>Education</b>                  |                         |              |         |                           |              |         |
| GCSE                              | 0.70                    | (0.53, 0.93) | 0.014   | 0.59                      | (0.43, 0.81) | 0.001   |
| A-level                           | 0.72                    | (0.52, 0.99) | 0.042   | 0.63                      | (0.44, 0.90) | 0.010   |
| No Formal qualification           | 0.64                    | (0.46, 0.87) | 0.005   | 0.63                      | (0.42, 0.95) | 0.029   |
| Other, still studying, don't know | 0.92                    | (0.63, 1.34) | 0.66    | 0.84                      | (0.55, 1.28) | 0.41    |
| <b>Social Grade</b>               |                         |              |         |                           |              |         |
| C1                                | 0.92                    | (0.68, 1.23) | 0.57    | 1.03                      | (0.75, 1.42) | 0.87    |

| Variable                     | Simple regression model |              |         | Multiple regression model |              |         |
|------------------------------|-------------------------|--------------|---------|---------------------------|--------------|---------|
|                              | OR                      | 95% CI       | P value | OR                        | 95% CI       | P value |
| C2                           | 1.12                    | (0.81, 1.55) | 0.48    | 1.25                      | (0.85, 1.83) | 0.26    |
| D                            | 1.06                    | (0.74, 1.51) | 0.75    | 1.27                      | (0.83, 1.94) | 0.27    |
| E                            | 1.48                    | (1.03, 2.15) | 0.036   | 1.74                      | (1.12, 2.70) | 0.014   |
| <b>Smoking Status</b>        |                         |              |         |                           |              |         |
| Previous smoker              | 0.88                    | (0.68, 1.13) | 0.32    | 0.97                      | (0.74, 1.28) | 0.83    |
| Current (tried quitting)     | 1.59                    | (1.17, 2.16) | 0.003   | 1.63                      | (1.18, 2.26) | 0.003   |
| Current (not tried quitting) | 1.28                    | (0.80, 2.04) | 0.30    | 1.31                      | (0.81, 2.12) | 0.28    |
| Refused to answer            | 1.08                    | (0.66, 1.74) | 0.77    | 0.93                      | (0.56, 1.55) | 0.78    |
| <b>Area</b>                  |                         |              |         |                           |              |         |
| North                        | 0.50                    | (0.30, 0.81) | 0.005   | 0.66                      | (0.39, 1.10) | 0.11    |
| North West                   | 0.82                    | (0.56, 1.21) | 0.33    | 1.03                      | (0.69, 1.56) | 0.87    |
| Yorks Hum                    | 0.49                    | (0.31, 0.76) | 0.002   | 0.62                      | (0.38, 1.01) | 0.054   |
| East Midlands                | 0.58                    | (0.38, 0.89) | 0.012   | 0.70                      | (0.45, 1.09) | 0.12    |
| West Midlands                | 0.49                    | (0.29, 0.81) | 0.006   | 0.68                      | (0.39, 1.16) | 0.16    |
| East Anglia                  | 0.86                    | (0.46, 1.60) | 0.63    | 1.06                      | (0.56, 2.01) | 0.86    |
| South East                   | 0.82                    | (0.51, 1.33) | 0.42    | 1.26                      | (0.75, 2.11) | 0.38    |
| South West                   | 0.63                    | (0.44, 0.92) | 0.015   | 0.97                      | (0.64, 1.45) | 0.86    |
| Wales                        | 0.37                    | (0.22, 0.64) | < 0.001 | 0.55                      | (0.31, 0.97) | 0.040   |
| Scotland                     | 0.54                    | (0.35, 0.84) | 0.006   | 0.78                      | (0.49, 1.26) | 0.31    |

*OR is odds ratio; CI is confidence interval; simple univariable regression models included only the categories for that variable; multiple regression include all variables. Reference categories were 65 and over (age), no children breastfed, no children, white ethnicity, male sex, university education social grade A and B combined, never smoked, and London.*

**Table 3** Responses to “Shopping vouchers for a woman for two months after the birth of her baby if she proves that she is still not smoking” broken down by independent variables

| Variable                          | SD         | D          | N          | A          | SA         |
|-----------------------------------|------------|------------|------------|------------|------------|
| <b>Age category</b>               |            |            |            |            |            |
| 18 – 24                           | 31 (18.2)  | 36 (21.2)  | 37 (21.8)  | 47 (27.6)  | 19 (11.2)  |
| 25 – 34                           | 33 (18.9)  | 41 (23.4)  | 32 (18.3)  | 46 (26.3)  | 23 (13.1)  |
| 35 – 44                           | 36 (19.9)  | 38 (21.0)  | 28 (15.5)  | 52 (28.7)  | 27 (14.9)  |
| 45 – 54                           | 44 (27.7)  | 33 (20.8)  | 26 (16.4)  | 40 (25.2)  | 16 (10.1)  |
| 55 – 59                           | 29 (40.3)  | 14 (19.4)  | 6 (8.3)    | 16 (22.2)  | 7 (9.7)    |
| 60 – 64                           | 28 (29.8)  | 12 (12.8)  | 15 (16.0)  | 25 (26.6)  | 14 (14.9)  |
| 65+                               | 118 (40.3) | 38 (13.0)  | 52 (17.7)  | 56 (19.1)  | 29 (9.9)   |
| <b>Breastfeeding</b>              |            |            |            |            |            |
| Children not breastfed            | 160 (25.3) | 123 (19.5) | 141 (22.3) | 138 (21.8) | 70 (11.1)  |
| Children breastfed                | 159 (31.1) | 89 (17.4)  | 55 (10.7)  | 144 (28.1) | 65 (12.7)  |
| <b>Children</b>                   |            |            |            |            |            |
| No children                       | 89 (22.1)  | 82 (20.4)  | 91 (22.6)  | 100 (24.9) | 40 (10.0)  |
| Have children                     | 230 (31.0) | 130 (17.5) | 105 (14.2) | 182 (24.5) | 95 (12.8)  |
| <b>Ethnicity</b>                  |            |            |            |            |            |
| White                             | 302 (30.7) | 184 (18.7) | 162 (16.4) | 227 (23.0) | 110 (11.2) |
| Other ethnicity                   | 17 (10.7)  | 28 (17.6)  | 34 (21.4)  | 55 (34.6)  | 25 (15.7)  |
| <b>Sex</b>                        |            |            |            |            |            |
| Male                              | 123 (22.8) | 97 (18.0)  | 109 (20.2) | 138 (25.6) | 73 (13.5)  |
| Female                            | 196 (32.5) | 115 (19.0) | 87 (14.4)  | 144 (23.8) | 62 (10.3)  |
| <b>Education</b>                  |            |            |            |            |            |
| University                        | 68 (23.1)  | 54 (18.3)  | 49 (16.6)  | 79 (26.8)  | 45 (15.3)  |
| GCSE                              | 102 (29.8) | 68 (19.9)  | 57 (16.7)  | 75 (21.9)  | 40 (11.7)  |
| A-level                           | 55 (28.5)  | 37 (19.2)  | 30 (15.5)  | 52 (26.9)  | 19 (9.8)   |
| No Formal qualification           | 67 (34.0)  | 29 (14.7)  | 44 (22.3)  | 43 (21.8)  | 14 (7.1)   |
| Other, still studying, don't know | 27 (23.1)  | 24 (20.5)  | 16 (13.7)  | 33 (28.2)  | 17 (14.5)  |

| Variable                     | SD         | D          | N          | A          | SA        |
|------------------------------|------------|------------|------------|------------|-----------|
| <b>Social Grade</b>          |            |            |            |            |           |
| AB                           | 71 (29.7)  | 41 (17.2)  | 36 (15.1)  | 59 (24.7)  | 32 (13.4) |
| C1                           | 110 (29.7) | 85 (23.0)  | 52 (14.1)  | 83 (22.4)  | 40 (10.8) |
| C2                           | 58 (24.6)  | 41 (17.4)  | 47 (19.9)  | 57 (24.2)  | 33 (14.0) |
| D                            | 48 (29.6)  | 26 (16.0)  | 32 (19.8)  | 42 (25.9)  | 14 (8.6)  |
| E                            | 32 (23.4)  | 19 (13.9)  | 29 (21.2)  | 41 (29.9)  | 16 (11.7) |
| <b>Smoking Status</b>        |            |            |            |            |           |
| Never smoked                 | 154 (26.9) | 110 (19.2) | 100 (17.5) | 151 (26.4) | 58 (10.1) |
| Previous smoker              | 100 (35.6) | 54 (19.2)  | 41 (14.6)  | 58 (20.6)  | 28 (10.0) |
| Current (tried quitting)     | 39 (22.3)  | 31 (17.7)  | 28 (16.0)  | 41 (23.4)  | 36 (20.6) |
| Current (not tried quitting) | 13 (20.6)  | 11 (17.5)  | 15 (23.8)  | 17 (27.0)  | 7 (11.1)  |
| Refused to answer            | 13 (25.0)  | 6 (11.5)   | 12 (23.1)  | 15 (28.8)  | 6 (11.5)  |
| <b>Area</b>                  |            |            |            |            |           |
| North                        | 24 (31.2)  | 18 (23.4)  | 11 (14.3)  | 13 (16.9)  | 11 (14.3) |
| North West                   | 21 (14.8)  | 22 (15.5)  | 40 (28.2)  | 41 (28.9)  | 18 (12.7) |
| Yorks Hum                    | 42 (40.4)  | 11 (10.6)  | 15 (14.4)  | 21 (20.2)  | 15 (14.4) |
| East Midlands                | 30 (27.5)  | 27 (24.8)  | 18 (16.5)  | 26 (23.9)  | 8 (7.3)   |
| West Midlands                | 25 (37.9)  | 14 (21.2)  | 6 (9.1)    | 16 (24.2)  | 5 (7.6)   |
| East Anglia                  | 10 (24.4)  | 7 (17.1)   | 4 (9.8)    | 11 (26.8)  | 9 (22.0)  |
| South East                   | 24 (29.6)  | 7 (8.6)    | 17 (21.0)  | 20 (24.7)  | 13 (16.0) |
| South West                   | 56 (28.0)  | 36 (18.0)  | 43 (21.5)  | 47 (23.5)  | 18 (9.0)  |
| London                       | 16 (10.7)  | 38 (25.5)  | 17 (11.4)  | 55 (36.9)  | 23 (15.4) |
| Wales                        | 29 (43.9)  | 9 (13.6)   | 5 (7.6)    | 15 (22.7)  | 8 (12.1)  |
| Scotland                     | 42 (38.5)  | 23 (21.1)  | 20 (18.3)  | 17 (15.6)  | 7 (6.4)   |

*SD = strongly disagree, D = disagree, N = neither agree nor disagree, A = agree, SA = strongly agree; cells are number (row percentages).*



**Table 4** Simple univariable and multiple ordered logit regression models for response to “Shopping vouchers for a woman for two months after the birth of her baby if she proves that she is still not smoking”

| Variable                          | Simple regression model |              |         | Multiple regression model |              |         |
|-----------------------------------|-------------------------|--------------|---------|---------------------------|--------------|---------|
|                                   | OR                      | 95% CI       | P value | OR                        | 95% CI       | P value |
| <b>Age category</b>               |                         |              |         |                           |              |         |
| 18 - 24                           | 1.89                    | (1.35, 2.64) | < 0.001 | 1.51                      | (1.00, 2.30) | 0.053   |
| 25 - 34                           | 1.88                    | (1.34, 2.62) | < 0.001 | 1.42                      | (0.97, 2.08) | 0.068   |
| 35 - 44                           | 2.04                    | (1.46, 2.85) | < 0.001 | 1.65                      | (1.14, 2.39) | 0.007   |
| 45 - 54                           | 1.42                    | (1.00, 2.01) | 0.048   | 1.26                      | (0.87, 1.84) | 0.23    |
| 55 - 59                           | 0.95                    | (0.59, 1.54) | 0.85    | 0.95                      | (0.58, 1.56) | 0.83    |
| 60 - 64                           | 1.70                    | (1.11, 2.61) | 0.015   | 1.65                      | (1.05, 2.57) | 0.028   |
| <b>Breastfeeding</b>              |                         |              |         |                           |              |         |
| Children breastfed                | 1.00                    | (0.81, 1.23) | 0.98    | 1.16                      | (0.86, 1.56) | 0.34    |
| <b>Children</b>                   |                         |              |         |                           |              |         |
| Have children                     | 0.88                    | (0.71, 1.09) | 0.24    | 1.02                      | (0.75, 1.39) | 0.90    |
| <b>Ethnicity</b>                  |                         |              |         |                           |              |         |
| Other ethnicity                   | 2.12                    | (1.59, 2.83) | < 0.001 | 1.39                      | (0.98, 1.95) | 0.062   |
| <b>Sex</b>                        |                         |              |         |                           |              |         |
| Female                            | 0.69                    | (0.56, 0.85) | 0.001   | 0.68                      | (0.55, 0.85) | 0.001   |
| <b>Education</b>                  |                         |              |         |                           |              |         |
| GCSE                              | 0.71                    | (0.53, 0.93) | 0.014   | 0.62                      | (0.45, 0.85) | 0.003   |
| A-level                           | 0.75                    | (0.55, 1.04) | 0.084   | 0.68                      | (0.48, 0.96) | 0.028   |
| No Formal qualification           | 0.60                    | (0.44, 0.83) | 0.002   | 0.64                      | (0.42, 0.96) | 0.032   |
| Other, still studying, don't know | 0.98                    | (0.67, 1.43) | 0.90    | 0.93                      | (0.61, 1.43) | 0.75    |

| Variable                     | Simple regression model |              |         | Multiple regression model |              |         |
|------------------------------|-------------------------|--------------|---------|---------------------------|--------------|---------|
|                              | OR                      | 95% CI       | P value | OR                        | 95% CI       | P value |
| <b>Social Grade</b>          |                         |              |         |                           |              |         |
| C1                           | 0.73                    | (0.56, 0.94) | 0.016   | 0.87                      | (0.66, 1.14) | 0.32    |
| C2                           | 1.45                    | (1.07, 1.97) | 0.017   | 1.64                      | (1.18, 2.27) | 0.003   |
| D                            | 1.22                    | (0.78, 1.92) | 0.38    | 1.31                      | (0.82, 2.10) | 0.26    |
| E                            | 1.22                    | (0.74, 2.01) | 0.43    | 1.18                      | (0.70, 1.99) | 0.54    |
| <b>Smoking Status</b>        |                         |              |         |                           |              |         |
| Previous smoker              | 0.85                    | (0.64, 1.14) | 0.28    | 0.94                      | (0.68, 1.29) | 0.69    |
| Current (tried quitting)     | 1.15                    | (0.83, 1.58) | 0.40    | 1.23                      | (0.84, 1.81) | 0.28    |
| Current (not tried quitting) | 0.92                    | (0.64, 1.31) | 0.64    | 1.11                      | (0.73, 1.70) | 0.62    |
| Refused to answer            | 1.25                    | (0.86, 1.81) | 0.24    | 1.37                      | (0.87, 2.15) | 0.17    |
| <b>Area</b>                  |                         |              |         |                           |              |         |
| North                        | 0.46                    | (0.28, 0.75) | 0.002   | 0.60                      | (0.36, 1.01) | 0.054   |
| North West                   | 0.84                    | (0.57, 1.25) | 0.38    | 1.02                      | (0.67, 1.55) | 0.92    |
| Yorks Hum                    | 0.42                    | (0.27, 0.67) | < 0.001 | 0.51                      | (0.31, 0.83) | 0.007   |
| East Midlands                | 0.46                    | (0.30, 0.71) | < 0.001 | 0.56                      | (0.36, 0.88) | 0.012   |
| West Midlands                | 0.36                    | (0.21, 0.61) | < 0.001 | 0.49                      | (0.28, 0.85) | 0.011   |
| East Anglia                  | 0.85                    | (0.45, 1.61) | 0.62    | 1.13                      | (0.58, 2.20) | 0.71    |
| South East                   | 0.67                    | (0.41, 1.08) | 0.10    | 1.01                      | (0.60, 1.70) | 0.97    |
| South West                   | 0.51                    | (0.35, 0.74) | < 0.001 | 0.73                      | (0.49, 1.10) | 0.14    |
| Wales                        | 0.35                    | (0.21, 0.61) | < 0.001 | 0.51                      | (0.29, 0.91) | 0.022   |
| Scotland                     | 0.31                    | (0.20, 0.49) | < 0.001 | 0.44                      | (0.28, 0.71) | 0.001   |

*OR is odds ratio; CI is confidence interval; simple univariable regression models included only the categories for that variable; multiple regression include all variables. Reference categories were 65 and over (age), no children breastfed, no children, white ethnicity, male sex, university education social grade A and B combined, never smoked, and London.*

**Table 5** Response to “Shopping vouchers for a woman for two months after the birth of her baby if she never lets anyone smoke in her home” by independent variables

| Variable                          | SD         | D          | N          | A          | SA         |
|-----------------------------------|------------|------------|------------|------------|------------|
| <b>Age category</b>               |            |            |            |            |            |
| 18 – 24                           | 27 (15.9)  | 35 (20.6)  | 43 (25.3)  | 49 (28.8)  | 16 (9.4)   |
| 25 – 34                           | 31 (17.7)  | 38 (21.7)  | 41 (23.4)  | 44 (25.1)  | 21 (12.0)  |
| 35 – 44                           | 38 (21.0)  | 37 (20.4)  | 35 (19.3)  | 41 (22.7)  | 30 (16.6)  |
| 45 – 54                           | 43 (27.0)  | 33 (20.8)  | 25 (15.7)  | 42 (26.4)  | 16 (10.1)  |
| 55 – 59                           | 30 (41.7)  | 14 (19.4)  | 6 (8.3)    | 11 (15.3)  | 11 (15.3)  |
| 60 – 64                           | 32 (34.0)  | 11 (11.7)  | 16 (17.0)  | 22 (23.4)  | 13 (13.8)  |
| 65+                               | 110 (37.5) | 47 (16.0)  | 58 (19.8)  | 38 (13.0)  | 40 (13.7)  |
| <b>Breastfeeding</b>              |            |            |            |            |            |
| Children not breastfed            | 161 (25.5) | 124 (19.6) | 146 (23.1) | 127 (20.1) | 74 (11.7)  |
| Children breastfed                | 150 (29.3) | 91 (17.8)  | 78 (15.2)  | 120 (23.4) | 73 (14.3)  |
| <b>Children</b>                   |            |            |            |            |            |
| No children                       | 90 (22.4)  | 81 (20.1)  | 94 (23.4)  | 91 (22.6)  | 46 (11.4)  |
| Have children                     | 221 (29.8) | 134 (18.1) | 130 (17.5) | 156 (21.0) | 101 (13.6) |
| <b>Ethnicity</b>                  |            |            |            |            |            |
| White                             | 296 (30.1) | 192 (19.5) | 183 (18.6) | 191 (19.4) | 123 (12.5) |
| Other ethnicity                   | 15 (9.4)   | 23 (14.5)  | 41 (25.8)  | 56 (35.2)  | 24 (15.1)  |
| <b>Sex</b>                        |            |            |            |            |            |
| Male                              | 128 (23.7) | 92 (17.0)  | 125 (23.1) | 116 (21.5) | 79 (14.6)  |
| Female                            | 183 (30.3) | 123 (20.4) | 99 (16.4)  | 131 (21.7) | 68 (11.3)  |
| <b>Education</b>                  |            |            |            |            |            |
| University                        | 66 (22.4)  | 50 (16.9)  | 58 (19.7)  | 74 (25.1)  | 47 (15.9)  |
| GCSE                              | 102 (29.8) | 62 (18.1)  | 63 (18.4)  | 75 (21.9)  | 40 (11.7)  |
| A-level                           | 55 (28.5)  | 42 (21.8)  | 40 (20.7)  | 37 (19.2)  | 19 (9.8)   |
| No Formal qualification           | 64 (32.5)  | 32 (16.2)  | 44 (22.3)  | 36 (18.3)  | 21 (10.7)  |
| Other, still studying, don't know | 24 (20.5)  | 29 (24.8)  | 19 (16.2)  | 25 (21.4)  | 20 (17.1)  |

| Variable                     | SD         | D          | N          | A          | SA        |
|------------------------------|------------|------------|------------|------------|-----------|
| <b>Social Grade</b>          |            |            |            |            |           |
| AB                           | 66 (27.6)  | 48 (20.1)  | 39 (16.3)  | 49 (20.5)  | 37 (15.5) |
| C1                           | 111 (30.0) | 81 (21.9)  | 68 (18.4)  | 73 (19.7)  | 37 (10.0) |
| C2                           | 57 (24.2)  | 41 (17.4)  | 48 (20.3)  | 56 (23.7)  | 34 (14.4) |
| D                            | 48 (29.6)  | 24 (14.8)  | 39 (24.1)  | 32 (19.8)  | 19 (11.7) |
| E                            | 29 (21.2)  | 21 (15.3)  | 30 (21.9)  | 37 (27.0)  | 20 (14.6) |
| <b>Smoking Status</b>        |            |            |            |            |           |
| Never smoked                 | 147 (25.7) | 108 (18.8) | 112 (19.5) | 142 (24.8) | 64 (11.2) |
| Previous smoker              | 100 (35.6) | 55 (19.6)  | 48 (17.1)  | 48 (17.1)  | 30 (10.7) |
| Current (tried quitting)     | 38 (21.7)  | 33 (18.9)  | 32 (18.3)  | 36 (20.6)  | 36 (20.6) |
| Current (not tried quitting) | 13 (20.6)  | 10 (15.9)  | 19 (30.2)  | 10 (15.9)  | 11 (17.5) |
| Refused to answer            | 13 (25.0)  | 9 (17.3)   | 13 (25.0)  | 11 (21.2)  | 6 (11.5)  |
| <b>Area</b>                  |            |            |            |            |           |
| North                        | 21 (27.3)  | 19 (24.7)  | 10 (13.0)  | 14 (18.2)  | 13 (16.9) |
| North West                   | 21 (14.8)  | 21 (14.8)  | 44 (31.0)  | 35 (24.6)  | 21 (14.8) |
| Yorks Hum                    | 38 (36.5)  | 15 (14.4)  | 23 (22.1)  | 14 (13.5)  | 14 (13.5) |
| East Midlands                | 29 (26.6)  | 30 (27.5)  | 22 (20.2)  | 19 (17.4)  | 9 (8.3)   |
| West Midlands                | 28 (42.4)  | 11 (16.7)  | 8 (12.1)   | 11 (16.7)  | 8 (12.1)  |
| East Anglia                  | 10 (24.4)  | 7 (17.1)   | 6 (14.6)   | 9 (22.0)   | 9 (22.0)  |
| South East                   | 23 (28.4)  | 8 (9.9)    | 18 (22.2)  | 22 (27.2)  | 10 (12.3) |
| South West                   | 54 (27.0)  | 41 (20.5)  | 47 (23.5)  | 35 (17.5)  | 23 (11.5) |
| London                       | 15 (10.1)  | 35 (23.5)  | 22 (14.8)  | 55 (36.9)  | 22 (14.8) |
| Wales                        | 29 (43.9)  | 9 (13.6)   | 6 (9.1)    | 12 (18.2)  | 10 (15.2) |
| Scotland                     | 43 (39.4)  | 19 (17.4)  | 18 (16.5)  | 21 (19.3)  | 8 (7.3)   |

*SD = strongly disagree, D = disagree, N = neither agree nor disagree, A = agree, SA = strongly agree; cells are number (row percentages).*

**Table 6** Simple univariable and multiple ordered logit regression models for response to “Shopping vouchers for a woman for two months after the birth of her baby if she never lets anyone smoke in her home”

| Variable                          | Simple regression model |              |         | Multiple regression model |              |         |
|-----------------------------------|-------------------------|--------------|---------|---------------------------|--------------|---------|
|                                   | OR                      | 95% CI       | P value | OR                        | 95% CI       | P value |
| <b>Age category</b>               |                         |              |         |                           |              |         |
| 18 - 24                           | 1.87                    | (1.34, 2.60) | < 0.001 | 1.55                      | (1.02, 2.35) | 0.040   |
| 25 - 34                           | 1.80                    | (1.29, 2.50) | 0.001   | 1.42                      | (0.97, 2.07) | 0.068   |
| 35 - 44                           | 1.83                    | (1.31, 2.56) | < 0.001 | 1.51                      | (1.04, 2.17) | 0.028   |
| 45 - 54                           | 1.40                    | (0.99, 1.98) | 0.058   | 1.26                      | (0.86, 1.83) | 0.23    |
| 55 - 59                           | 0.89                    | (0.54, 1.44) | 0.63    | 0.88                      | (0.53, 1.46) | 0.62    |
| 60 - 64                           | 1.36                    | (0.88, 2.09) | 0.16    | 1.28                      | (0.82, 2.00) | 0.28    |
| <b>Breastfeeding</b>              |                         |              |         |                           |              |         |
| Children breastfed                | 1.03                    | (0.83, 1.26) | 0.81    | 1.27                      | (0.95, 1.71) | 0.11    |
| <b>Children</b>                   |                         |              |         |                           |              |         |
| Have children                     | 0.87                    | (0.70, 1.08) | 0.21    | 0.96                      | (0.70, 1.31) | 0.78    |
| <b>Ethnicity</b>                  |                         |              |         |                           |              |         |
| Other ethnicity                   | 2.26                    | (1.70, 3.01) | < 0.001 | 1.49                      | (1.06, 2.08) | 0.021   |
| <b>Sex</b>                        |                         |              |         |                           |              |         |
| Female                            | 0.75                    | (0.61, 0.92) | 0.005   | 0.72                      | (0.58, 0.90) | 0.003   |
| <b>Education</b>                  |                         |              |         |                           |              |         |
| GCSE                              | 0.70                    | (0.53, 0.92) | 0.012   | 0.60                      | (0.44, 0.83) | 0.002   |
| A-level                           | 0.64                    | (0.47, 0.89) | 0.007   | 0.56                      | (0.39, 0.79) | 0.001   |
| No Formal qualification           | 0.62                    | (0.45, 0.86) | 0.004   | 0.66                      | (0.44, 1.00) | 0.048   |
| Other, still studying, don't know | 0.93                    | (0.64, 1.37) | 0.73    | 0.90                      | (0.59, 1.38) | 0.64    |

| Variable                     | Simple regression model |              |         | Multiple regression model |              |         |
|------------------------------|-------------------------|--------------|---------|---------------------------|--------------|---------|
|                              | OR                      | 95% CI       | P value | OR                        | 95% CI       | P value |
| <b>Social Grade</b>          |                         |              |         |                           |              |         |
| C1                           | 0.80                    | (0.60, 1.07) | 0.13    | 0.84                      | (0.61, 1.16) | 0.29    |
| C2                           | 1.15                    | (0.83, 1.59) | 0.39    | 1.22                      | (0.83, 1.79) | 0.30    |
| D                            | 0.91                    | (0.64, 1.31) | 0.62    | 1.05                      | (0.69, 1.61) | 0.81    |
| E                            | 1.33                    | (0.92, 1.93) | 0.13    | 1.37                      | (0.88, 2.15) | 0.17    |
| <b>Smoking Status</b>        |                         |              |         |                           |              |         |
| Previous smoker              | 0.67                    | (0.52, 0.87) | 0.002   | 0.79                      | (0.60, 1.04) | 0.089   |
| Current (tried quitting)     | 1.33                    | (0.98, 1.80) | 0.065   | 1.48                      | (1.08, 2.04) | 0.016   |
| Current (not tried quitting) | 1.22                    | (0.77, 1.92) | 0.40    | 1.31                      | (0.81, 2.11) | 0.27    |
| Refused to answer            | 1.00                    | (0.61, 1.64) | 0.99    | 0.95                      | (0.57, 1.59) | 0.85    |
| <b>Area</b>                  |                         |              |         |                           |              |         |
| North                        | 0.53                    | (0.32, 0.87) | 0.012   | 0.74                      | (0.44, 1.24) | 0.25    |
| North West                   | 0.84                    | (0.57, 1.25) | 0.39    | 1.06                      | (0.70, 1.60) | 0.80    |
| Yorks Hum                    | 0.40                    | (0.26, 0.63) | < 0.001 | 0.50                      | (0.31, 0.81) | 0.005   |
| East Midlands                | 0.43                    | (0.28, 0.65) | < 0.001 | 0.53                      | (0.34, 0.82) | 0.004   |
| West Midlands                | 0.32                    | (0.19, 0.55) | < 0.001 | 0.47                      | (0.27, 0.82) | 0.009   |
| East Anglia                  | 0.77                    | (0.41, 1.45) | 0.42    | 1.08                      | (0.57, 2.06) | 0.82    |
| South East                   | 0.63                    | (0.39, 1.01) | 0.057   | 1.06                      | (0.64, 1.75) | 0.84    |
| South West                   | 0.49                    | (0.34, 0.71) | < 0.001 | 0.77                      | (0.51, 1.15) | 0.20    |
| Wales                        | 0.35                    | (0.20, 0.60) | < 0.001 | 0.56                      | (0.32, 1.01) | 0.054   |
| Scotland                     | 0.33                    | (0.21, 0.52) | < 0.001 | 0.52                      | (0.32, 0.83) | 0.006   |

*OR is odds ratio; CI is confidence interval; simple univariable regression models included only the categories for that variable; multiple regression include all variables. Reference categories were 65 and over (age), no children breastfed, no children, white ethnicity, male sex, university education social grade A and B combined, never smoked, and London.*

**Table 7** Response to “Shopping vouchers for women who prove that they are breastfeeding for the first 6 months after birth” by independent variables

| Variable                          | SD         | D          | N          | A          | SA         |
|-----------------------------------|------------|------------|------------|------------|------------|
| <b>Age category</b>               |            |            |            |            |            |
| 18 – 24                           | 20 (11.8)  | 32 (18.8)  | 58 (34.1)  | 42 (24.7)  | 18 (10.6)  |
| 25 – 34                           | 23 (13.1)  | 30 (17.1)  | 45 (25.7)  | 47 (26.9)  | 30 (17.1)  |
| 35 – 44                           | 25 (13.8)  | 36 (19.9)  | 46 (25.4)  | 39 (21.5)  | 35 (19.3)  |
| 45 – 54                           | 32 (20.1)  | 34 (21.4)  | 40 (25.2)  | 34 (21.4)  | 19 (11.9)  |
| 55 – 59                           | 18 (25.0)  | 20 (27.8)  | 16 (22.2)  | 7 (9.7)    | 11 (15.3)  |
| 60 – 64                           | 31 (33.0)  | 15 (16.0)  | 19 (20.2)  | 18 (19.1)  | 11 (11.7)  |
| 65+                               | 87 (29.7)  | 44 (15.0)  | 82 (28.0)  | 48 (16.4)  | 32 (10.9)  |
| <b>Breastfeeding</b>              |            |            |            |            |            |
| Children not breastfed            | 114 (18.0) | 120 (19.0) | 216 (34.2) | 128 (20.3) | 54 (8.5)   |
| Children breastfed                | 122 (23.8) | 91 (17.8)  | 90 (17.6)  | 107 (20.9) | 102 (19.9) |
| <b>Children</b>                   |            |            |            |            |            |
| No children                       | 61 (15.2)  | 73 (18.2)  | 138 (34.3) | 93 (23.1)  | 37 (9.2)   |
| Have children                     | 175 (23.6) | 138 (18.6) | 168 (22.6) | 142 (19.1) | 119 (16.0) |
| <b>Ethnicity</b>                  |            |            |            |            |            |
| White                             | 226 (22.9) | 194 (19.7) | 265 (26.9) | 184 (18.7) | 116 (11.8) |
| Other ethnicity                   | 10 (6.3)   | 17 (10.7)  | 41 (25.8)  | 51 (32.1)  | 40 (25.2)  |
| <b>Sex</b>                        |            |            |            |            |            |
| Male                              | 93 (17.2)  | 84 (15.6)  | 180 (33.3) | 115 (21.3) | 68 (12.6)  |
| Female                            | 143 (23.7) | 127 (21.0) | 126 (20.9) | 120 (19.9) | 88 (14.6)  |
| <b>Education</b>                  |            |            |            |            |            |
| University                        | 58 (19.7)  | 59 (20.0)  | 72 (24.4)  | 61 (20.7)  | 45 (15.3)  |
| GCSE                              | 66 (19.3)  | 63 (18.4)  | 90 (26.3)  | 72 (21.1)  | 51 (14.9)  |
| A-level                           | 47 (24.4)  | 40 (20.7)  | 52 (26.9)  | 29 (15.0)  | 25 (13.0)  |
| No Formal qualification           | 43 (21.8)  | 28 (14.2)  | 66 (33.5)  | 37 (18.8)  | 23 (11.7)  |
| Other, still studying, don't know | 22 (18.8)  | 21 (17.9)  | 26 (22.2)  | 36 (30.8)  | 12 (10.3)  |

| Variable                     | SD         | D          | N          | A          | SA        |
|------------------------------|------------|------------|------------|------------|-----------|
| <b>Social Grade</b>          |            |            |            |            |           |
| AB                           | 59 (24.7)  | 40 (16.7)  | 61 (25.5)  | 45 (18.8)  | 34 (14.2) |
| C1                           | 82 (22.2)  | 86 (23.2)  | 85 (23.0)  | 74 (20.0)  | 43 (11.6) |
| C2                           | 41 (17.4)  | 40 (16.9)  | 73 (30.9)  | 50 (21.2)  | 32 (13.6) |
| D                            | 31 (19.1)  | 26 (16.0)  | 52 (32.1)  | 33 (20.4)  | 20 (12.3) |
| E                            | 23 (16.8)  | 19 (13.9)  | 35 (25.5)  | 33 (24.1)  | 27 (19.7) |
| <b>Smoking Status</b>        |            |            |            |            |           |
| Never smoked                 | 113 (19.7) | 104 (18.2) | 142 (24.8) | 139 (24.3) | 75 (13.1) |
| Previous smoker              | 70 (24.9)  | 59 (21.0)  | 72 (25.6)  | 45 (16.0)  | 35 (12.5) |
| Current (tried quitting)     | 27 (15.4)  | 33 (18.9)  | 53 (30.3)  | 26 (14.9)  | 36 (20.6) |
| Current (not tried quitting) | 14 (22.2)  | 11 (17.5)  | 19 (30.2)  | 16 (25.4)  | 3 (4.8)   |
| Refused to answer            | 12 (23.1)  | 4 (7.7)    | 20 (38.5)  | 9 (17.3)   | 7 (13.5)  |
| <b>Area</b>                  |            |            |            |            |           |
| North                        | 16 (20.8)  | 16 (20.8)  | 19 (24.7)  | 8 (10.4)   | 18 (23.4) |
| North West                   | 15 (10.6)  | 26 (18.3)  | 41 (28.9)  | 36 (25.4)  | 24 (16.9) |
| Yorks Hum                    | 28 (26.9)  | 15 (14.4)  | 32 (30.8)  | 21 (20.2)  | 8 (7.7)   |
| East Midlands                | 22 (20.2)  | 26 (23.9)  | 33 (30.3)  | 22 (20.2)  | 6 (5.5)   |
| West Midlands                | 23 (34.8)  | 14 (21.2)  | 15 (22.7)  | 7 (10.6)   | 7 (10.6)  |
| East Anglia                  | 4 (9.8)    | 11 (26.8)  | 8 (19.5)   | 10 (24.4)  | 8 (19.5)  |
| South East                   | 14 (17.3)  | 11 (13.6)  | 28 (34.6)  | 15 (18.5)  | 13 (16.0) |
| South West                   | 52 (26.0)  | 37 (18.5)  | 61 (30.5)  | 33 (16.5)  | 17 (8.5)  |
| London                       | 14 (9.4)   | 25 (16.8)  | 27 (18.1)  | 56 (37.6)  | 27 (18.1) |
| Wales                        | 23 (34.8)  | 13 (19.7)  | 10 (15.2)  | 9 (13.6)   | 11 (16.7) |
| Scotland                     | 25 (22.9)  | 17 (15.6)  | 32 (29.4)  | 18 (16.5)  | 17 (15.6) |

*SD = strongly disagree, D = disagree, N = neither agree nor disagree, A = agree, SA = strongly agree; cells are number (row percentages).*



**Table 8** Simple univariable and multiple ordered logit regression models for response to “Shopping vouchers for women who prove that they are breastfeeding for the first 6 months after birth”

| Variable                          | Simple regression model |              |         | Multiple regression model |              |         |
|-----------------------------------|-------------------------|--------------|---------|---------------------------|--------------|---------|
|                                   | OR                      | 95% CI       | P value | OR                        | 95% CI       | P value |
| <b>Age category</b>               |                         |              |         |                           |              |         |
| 18 - 24                           | 1.71                    | (1.23, 2.37) | 0.001   | 1.71                      | (1.13, 2.60) | 0.012   |
| 25 - 34                           | 2.09                    | (1.49, 2.92) | < 0.001 | 1.91                      | (1.31, 2.80) | 0.001   |
| 35 - 44                           | 1.94                    | (1.39, 2.71) | < 0.001 | 1.73                      | (1.20, 2.50) | 0.003   |
| 45 - 54                           | 1.32                    | (0.94, 1.86) | 0.11    | 1.38                      | (0.95, 2.01) | 0.090   |
| 55 - 59                           | 0.96                    | (0.60, 1.52) | 0.85    | 1.02                      | (0.63, 1.64) | 0.95    |
| 60 - 64                           | 0.94                    | (0.61, 1.44) | 0.78    | 1.01                      | (0.65, 1.59) | 0.95    |
| <b>Breastfeeding</b>              |                         |              |         |                           |              |         |
| Children breastfed                | 1.19                    | (0.96, 1.46) | 0.11    | 1.67                      | (1.24, 2.25) | 0.001   |
| <b>Children</b>                   |                         |              |         |                           |              |         |
| Have children                     | 0.90                    | (0.73, 1.11) | 0.31    | 0.80                      | (0.59, 1.08) | 0.15    |
| <b>Ethnicity</b>                  |                         |              |         |                           |              |         |
| Other ethnicity                   | 3.04                    | (2.26, 4.10) | < 0.001 | 2.03                      | (1.43, 2.88) | < 0.001 |
| <b>Sex</b>                        |                         |              |         |                           |              |         |
| Female                            | 0.80                    | (0.65, 0.99) | 0.037   | 0.77                      | (0.62, 0.95) | 0.016   |
| <b>Education</b>                  |                         |              |         |                           |              |         |
| GCSE                              | 1.03                    | (0.78, 1.36) | 0.84    | 1.01                      | (0.74, 1.40) | 0.93    |
| A-level                           | 0.76                    | (0.55, 1.04) | 0.089   | 0.71                      | (0.50, 1.02) | 0.061   |
| No Formal qualification           | 0.91                    | (0.66, 1.25) | 0.56    | 1.22                      | (0.82, 1.82) | 0.33    |
| Other, still studying, don't know | 1.07                    | (0.74, 1.57) | 0.71    | 1.10                      | (0.72, 1.67) | 0.67    |

| Variable                     | Simple regression model |              |         | Multiple regression model |              |         |
|------------------------------|-------------------------|--------------|---------|---------------------------|--------------|---------|
|                              | OR                      | 95% CI       | P value | OR                        | 95% CI       | P value |
| <b>Social Grade</b>          |                         |              |         |                           |              |         |
| C1                           | 0.93                    | (0.70, 1.25) | 0.63    | 0.84                      | (0.61, 1.16) | 0.29    |
| C2                           | 1.23                    | (0.90, 1.70) | 0.20    | 0.96                      | (0.66, 1.40) | 0.83    |
| D                            | 1.14                    | (0.80, 1.63) | 0.46    | 0.92                      | (0.60, 1.40) | 0.69    |
| E                            | 1.62                    | (1.11, 2.37) | 0.012   | 1.21                      | (0.77, 1.89) | 0.41    |
| <b>Smoking Status</b>        |                         |              |         |                           |              |         |
| Previous smoker              | 0.73                    | (0.56, 0.94) | 0.014   | 0.89                      | (0.67, 1.17) | 0.40    |
| Current (tried quitting)     | 1.17                    | (0.87, 1.58) | 0.31    | 1.17                      | (0.85, 1.61) | 0.34    |
| Current (not tried quitting) | 0.78                    | (0.50, 1.23) | 0.29    | 0.75                      | (0.47, 1.19) | 0.22    |
| Refused to answer            | 0.97                    | (0.59, 1.59) | 0.89    | 0.91                      | (0.55, 1.51) | 0.71    |
| <b>Area</b>                  |                         |              |         |                           |              |         |
| North                        | 0.53                    | (0.32, 0.88) | 0.014   | 0.79                      | (0.47, 1.35) | 0.39    |
| North West                   | 0.76                    | (0.51, 1.13) | 0.18    | 1.01                      | (0.66, 1.55) | 0.95    |
| Yorks Hum                    | 0.38                    | (0.25, 0.60) | < 0.001 | 0.56                      | (0.35, 0.90) | 0.016   |
| East Midlands                | 0.38                    | (0.25, 0.59) | < 0.001 | 0.46                      | (0.29, 0.71) | < 0.001 |
| West Midlands                | 0.25                    | (0.15, 0.42) | < 0.001 | 0.40                      | (0.23, 0.69) | 0.001   |
| East Anglia                  | 0.73                    | (0.40, 1.35) | 0.32    | 0.98                      | (0.52, 1.85) | 0.94    |
| South East                   | 0.60                    | (0.38, 0.97) | 0.039   | 1.01                      | (0.61, 1.69) | 0.96    |
| South West                   | 0.36                    | (0.25, 0.52) | < 0.001 | 0.62                      | (0.41, 0.93) | 0.021   |
| Wales                        | 0.30                    | (0.18, 0.52) | < 0.001 | 0.53                      | (0.30, 0.94) | 0.029   |
| Scotland                     | 0.48                    | (0.31, 0.75) | 0.001   | 0.84                      | (0.52, 1.36) | 0.47    |

*OR is odds ratio; CI is confidence interval; simple univariable regression models included only the categories for that variable; multiple regression include all variables. Reference categories were 65 and over (age), no children breastfed, no children, white ethnicity, male sex, university education social grade A and B combined, never smoked, and London.*

**Table 9** Response to “A breast pump costing around £40 provided for free on the NHS” by independent variables

| Variable                          | SD         | D          | N          | A          | SA         |
|-----------------------------------|------------|------------|------------|------------|------------|
| <b>Age category</b>               |            |            |            |            |            |
| 18 – 24                           | 10 (5.9)   | 21 (12.4)  | 58 (34.1)  | 52 (30.6)  | 29 (17.1)  |
| 25 – 34                           | 18 (10.3)  | 17 (9.7)   | 48 (27.4)  | 57 (32.6)  | 35 (20.0)  |
| 35 – 44                           | 22 (12.2)  | 24 (13.3)  | 37 (20.4)  | 57 (31.5)  | 41 (22.7)  |
| 45 – 54                           | 27 (17.0)  | 24 (15.1)  | 34 (21.4)  | 44 (27.7)  | 30 (18.9)  |
| 55 – 59                           | 10 (13.9)  | 13 (18.1)  | 19 (26.4)  | 22 (30.6)  | 8 (11.1)   |
| 60 – 64                           | 22 (23.4)  | 10 (10.6)  | 23 (24.5)  | 21 (22.3)  | 18 (19.1)  |
| 65+                               | 56 (19.1)  | 38 (13.0)  | 89 (30.4)  | 63 (21.5)  | 47 (16.0)  |
| <b>Breastfeeding</b>              |            |            |            |            |            |
| Children not breastfed            | 93 (14.7)  | 79 (12.5)  | 210 (33.2) | 164 (25.9) | 86 (13.6)  |
| Children breastfed                | 72 (14.1)  | 68 (13.3)  | 98 (19.1)  | 152 (29.7) | 122 (23.8) |
| <b>Children</b>                   |            |            |            |            |            |
| No children                       | 49 (12.2)  | 50 (12.4)  | 132 (32.8) | 119 (29.6) | 52 (12.9)  |
| Have children                     | 116 (15.6) | 97 (13.1)  | 176 (23.7) | 197 (26.5) | 156 (21.0) |
| <b>Ethnicity</b>                  |            |            |            |            |            |
| White                             | 158 (16.0) | 132 (13.4) | 252 (25.6) | 265 (26.9) | 178 (18.1) |
| Other ethnicity                   | 7 (4.4)    | 15 (9.4)   | 56 (35.2)  | 51 (32.1)  | 30 (18.9)  |
| <b>Sex</b>                        |            |            |            |            |            |
| Male                              | 70 (13.0)  | 62 (11.5)  | 174 (32.2) | 142 (26.3) | 92 (17.0)  |
| Female                            | 95 (15.7)  | 85 (14.1)  | 134 (22.2) | 174 (28.8) | 116 (19.2) |
| <b>Education</b>                  |            |            |            |            |            |
| University                        | 31 (10.5)  | 36 (12.2)  | 75 (25.4)  | 87 (29.5)  | 66 (22.4)  |
| GCSE                              | 54 (15.8)  | 40 (11.7)  | 98 (28.7)  | 89 (26.0)  | 61 (17.8)  |
| A-level                           | 30 (15.5)  | 25 (13.0)  | 51 (26.4)  | 49 (25.4)  | 38 (19.7)  |
| No Formal qualification           | 36 (18.3)  | 29 (14.7)  | 56 (28.4)  | 51 (25.9)  | 25 (12.7)  |
| Other, still studying, don't know | 14 (12.0)  | 17 (14.5)  | 28 (23.9)  | 40 (34.2)  | 18 (15.4)  |

| Variable                     | SD        | D         | N          | A          | SA        |
|------------------------------|-----------|-----------|------------|------------|-----------|
| <b>Social Grade</b>          |           |           |            |            |           |
| AB                           | 36 (15.1) | 32 (13.4) | 55 (23.0)  | 59 (24.7)  | 57 (23.8) |
| C1                           | 57 (15.4) | 58 (15.7) | 98 (26.5)  | 99 (26.8)  | 58 (15.7) |
| C2                           | 33 (14.0) | 23 (9.7)  | 76 (32.2)  | 71 (30.1)  | 33 (14.0) |
| D                            | 26 (16.0) | 20 (12.3) | 43 (26.5)  | 44 (27.2)  | 29 (17.9) |
| E                            | 13 (9.5)  | 14 (10.2) | 36 (26.3)  | 43 (31.4)  | 31 (22.6) |
| <b>Smoking Status</b>        |           |           |            |            |           |
| Never smoked                 | 71 (12.4) | 68 (11.9) | 167 (29.1) | 173 (30.2) | 94 (16.4) |
| Previous smoker              | 50 (17.8) | 43 (15.3) | 64 (22.8)  | 76 (27.0)  | 48 (17.1) |
| Current (tried quitting)     | 27 (15.4) | 22 (12.6) | 40 (22.9)  | 38 (21.7)  | 48 (27.4) |
| Current (not tried quitting) | 8 (12.7)  | 7 (11.1)  | 17 (27.0)  | 19 (30.2)  | 12 (19.0) |
| Refused to answer            | 9 (17.3)  | 7 (13.5)  | 20 (38.5)  | 10 (19.2)  | 6 (11.5)  |
| <b>Area</b>                  |           |           |            |            |           |
| North                        | 14 (18.2) | 11 (14.3) | 13 (16.9)  | 21 (27.3)  | 18 (23.4) |
| North West                   | 7 (4.9)   | 14 (9.9)  | 46 (32.4)  | 49 (34.5)  | 26 (18.3) |
| Yorks Hum                    | 21 (20.2) | 3 (2.9)   | 25 (24.0)  | 28 (26.9)  | 27 (26.0) |
| East Midlands                | 18 (16.5) | 28 (25.7) | 32 (29.4)  | 20 (18.3)  | 11 (10.1) |
| West Midlands                | 9 (13.6)  | 12 (18.2) | 13 (19.7)  | 21 (31.8)  | 11 (16.7) |
| East Anglia                  | 5 (12.2)  | 6 (14.6)  | 10 (24.4)  | 13 (31.7)  | 7 (17.1)  |
| South East                   | 5 (6.2)   | 8 (9.9)   | 26 (32.1)  | 20 (24.7)  | 22 (27.2) |
| South West                   | 36 (18.0) | 23 (11.5) | 70 (35.0)  | 39 (19.5)  | 32 (16.0) |
| London                       | 7 (4.7)   | 15 (10.1) | 37 (24.8)  | 68 (45.6)  | 22 (14.8) |
| Wales                        | 21 (31.8) | 13 (19.7) | 7 (10.6)   | 13 (19.7)  | 12 (18.2) |
| Scotland                     | 22 (20.2) | 14 (12.8) | 29 (26.6)  | 24 (22.0)  | 20 (18.3) |

*SD = strongly disagree, D = disagree, N = neither agree nor disagree, A = agree, SA = strongly agree; cells are number (row percentages).*

**Table 10** Simple univariable and multiple ordered logit regression models for response to “A breast pump costing around £40 provided for free on the NHS”

| Variable                          | Simple regression model |              |         | Multiple regression model |              |         |
|-----------------------------------|-------------------------|--------------|---------|---------------------------|--------------|---------|
|                                   | OR                      | 95% CI       | P value | OR                        | 95% CI       | P value |
| <b>Age category</b>               |                         |              |         |                           |              |         |
| 18 - 24                           | 1.60                    | (1.15, 2.22) | 0.005   | 1.74                      | (1.14, 2.63) | 0.010   |
| 25 - 34                           | 1.73                    | (1.24, 2.41) | 0.001   | 1.63                      | (1.11, 2.37) | 0.012   |
| 35 - 44                           | 1.72                    | (1.23, 2.40) | 0.002   | 1.57                      | (1.08, 2.27) | 0.017   |
| 45 - 54                           | 1.24                    | (0.88, 1.76) | 0.22    | 1.22                      | (0.84, 1.78) | 0.30    |
| 55 - 59                           | 1.06                    | (0.68, 1.67) | 0.79    | 0.92                      | (0.57, 1.48) | 0.74    |
| 60 - 64                           | 1.04                    | (0.68, 1.59) | 0.87    | 0.90                      | (0.58, 1.41) | 0.65    |
| <b>Breastfeeding</b>              |                         |              |         |                           |              |         |
| Children breastfed                | 1.49                    | (1.21, 1.84) | < 0.001 | 1.84                      | (1.36, 2.49) | < 0.001 |
| <b>Children</b>                   |                         |              |         |                           |              |         |
| Have children                     | 1.13                    | (0.91, 1.39) | 0.27    | 0.95                      | (0.70, 1.30) | 0.75    |
| <b>Ethnicity</b>                  |                         |              |         |                           |              |         |
| Other ethnicity                   | 1.46                    | (1.10, 1.95) | 0.009   | 1.07                      | (0.76, 1.51) | 0.70    |
| <b>Sex</b>                        |                         |              |         |                           |              |         |
| Female                            | 1.02                    | (0.83, 1.26) | 0.84    | 0.95                      | (0.77, 1.18) | 0.66    |
| <b>Education</b>                  |                         |              |         |                           |              |         |
| GCSE                              | 0.73                    | (0.55, 0.97) | 0.028   | 0.70                      | (0.51, 0.96) | 0.026   |
| A-level                           | 0.76                    | (0.55, 1.05) | 0.099   | 0.73                      | (0.52, 1.04) | 0.085   |
| No Formal qualification           | 0.57                    | (0.41, 0.78) | 0.001   | 0.62                      | (0.41, 0.93) | 0.020   |
| Other, still studying, don't know | 0.82                    | (0.56, 1.19) | 0.29    | 0.87                      | (0.57, 1.33) | 0.53    |

| <b>Social Grade</b>          |      |              |         |      |              |         |
|------------------------------|------|--------------|---------|------|--------------|---------|
| C1                           | 0.77 | (0.57, 1.03) | 0.076   | 0.84 | (0.61, 1.15) | 0.28    |
| C2                           | 0.86 | (0.62, 1.18) | 0.34    | 0.92 | (0.63, 1.34) | 0.67    |
| D                            | 0.85 | (0.59, 1.22) | 0.38    | 1.02 | (0.67, 1.55) | 0.93    |
| E                            | 1.25 | (0.86, 1.82) | 0.24    | 1.57 | (1.00, 2.46) | 0.050   |
| <b>Smoking Status</b>        |      |              |         |      |              |         |
| Previous smoker              | 0.82 | (0.64, 1.06) | 0.14    | 0.93 | (0.71, 1.23) | 0.62    |
| Current (tried quitting)     | 1.16 | (0.85, 1.59) | 0.35    | 1.13 | (0.81, 1.57) | 0.47    |
| Current (not tried quitting) | 1.09 | (0.69, 1.73) | 0.71    | 1.25 | (0.78, 2.01) | 0.36    |
| Refused to answer            | 0.64 | (0.39, 1.05) | 0.076   | 0.67 | (0.41, 1.12) | 0.12    |
| <b>Area</b>                  |      |              |         |      |              |         |
| North                        | 0.71 | (0.43, 1.18) | 0.19    | 0.86 | (0.51, 1.45) | 0.56    |
| North West                   | 0.93 | (0.63, 1.38) | 0.73    | 1.15 | (0.77, 1.74) | 0.49    |
| Yorks Hum                    | 0.87 | (0.56, 1.37) | 0.55    | 1.05 | (0.65, 1.70) | 0.84    |
| East Midlands                | 0.36 | (0.24, 0.55) | < 0.001 | 0.41 | (0.26, 0.64) | < 0.001 |
| West Midlands                | 0.65 | (0.39, 1.08) | 0.096   | 0.81 | (0.47, 1.41) | 0.46    |
| East Anglia                  | 0.71 | (0.39, 1.30) | 0.26    | 0.78 | (0.42, 1.48) | 0.45    |
| South East                   | 1.04 | (0.65, 1.68) | 0.86    | 1.40 | (0.85, 2.31) | 0.19    |
| South West                   | 0.51 | (0.35, 0.73) | < 0.001 | 0.68 | (0.45, 1.02) | 0.065   |
| Wales                        | 0.32 | (0.19, 0.55) | < 0.001 | 0.44 | (0.25, 0.79) | 0.006   |
| Scotland                     | 0.53 | (0.34, 0.82) | 0.004   | 0.73 | (0.45, 1.18) | 0.20    |

*OR is odds ratio; CI is confidence interval; simple univariable regression models included only the categories for that variable; multiple regression include all variables. Reference categories were 65 and over (age), no children breastfed, no children, white ethnicity, male sex, university education social grade A and B combined, never smoked, and London.*

**Table 11** Response to “Additional funding for local health services if they reach targets for the number of women who prove that they have stopped smoking during pregnancy” by independent variables

| Variable                          | SD         | D          | N          | A          | SA         |
|-----------------------------------|------------|------------|------------|------------|------------|
| <b>Age category</b>               |            |            |            |            |            |
| 18 – 24                           | 19 (11.2)  | 29 (17.1)  | 40 (23.5)  | 61 (35.9)  | 21 (12.4)  |
| 25 – 34                           | 22 (12.6)  | 32 (18.3)  | 42 (24.0)  | 57 (32.6)  | 22 (12.6)  |
| 35 – 44                           | 23 (12.7)  | 32 (17.7)  | 43 (23.8)  | 56 (30.9)  | 27 (14.9)  |
| 45 – 54                           | 32 (20.1)  | 28 (17.6)  | 40 (25.2)  | 35 (22.0)  | 24 (15.1)  |
| 55 – 59                           | 17 (23.6)  | 15 (20.8)  | 10 (13.9)  | 20 (27.8)  | 10 (13.9)  |
| 60 – 64                           | 29 (30.9)  | 10 (10.6)  | 22 (23.4)  | 24 (25.5)  | 9 (9.6)    |
| 65+                               | 92 (31.4)  | 46 (15.7)  | 70 (23.9)  | 53 (18.1)  | 32 (10.9)  |
| <b>Breastfeeding</b>              |            |            |            |            |            |
| Children not breastfed            | 125 (19.8) | 111 (17.6) | 151 (23.9) | 168 (26.6) | 77 (12.2)  |
| Children breastfed                | 109 (21.3) | 81 (15.8)  | 116 (22.7) | 138 (27.0) | 68 (13.3)  |
| <b>Children</b>                   |            |            |            |            |            |
| No children                       | 75 (18.7)  | 66 (16.4)  | 97 (24.1)  | 117 (29.1) | 47 (11.7)  |
| Have children                     | 159 (21.4) | 126 (17.0) | 170 (22.9) | 189 (25.5) | 98 (13.2)  |
| <b>Ethnicity</b>                  |            |            |            |            |            |
| White                             | 224 (22.7) | 169 (17.2) | 223 (22.6) | 248 (25.2) | 121 (12.3) |
| Other ethnicity                   | 10 (6.3)   | 23 (14.5)  | 44 (27.7)  | 58 (36.5)  | 24 (15.1)  |
| <b>Sex</b>                        |            |            |            |            |            |
| Male                              | 101 (18.7) | 91 (16.9)  | 130 (24.1) | 149 (27.6) | 69 (12.8)  |
| Female                            | 133 (22.0) | 101 (16.7) | 137 (22.7) | 157 (26.0) | 76 (12.6)  |
| <b>Education</b>                  |            |            |            |            |            |
| University                        | 51 (17.3)  | 45 (15.3)  | 68 (23.1)  | 87 (29.5)  | 44 (14.9)  |
| GCSE                              | 75 (21.9)  | 59 (17.3)  | 83 (24.3)  | 86 (25.1)  | 39 (11.4)  |
| A-level                           | 39 (20.2)  | 41 (21.2)  | 39 (20.2)  | 48 (24.9)  | 26 (13.5)  |
| No Formal qualification           | 48 (24.4)  | 28 (14.2)  | 50 (25.4)  | 51 (25.9)  | 20 (10.2)  |
| Other, still studying, don't know | 21 (17.9)  | 19 (16.2)  | 27 (23.1)  | 34 (29.1)  | 16 (13.7)  |

| Variable                     | SD         | D         | N          | A          | SA        |
|------------------------------|------------|-----------|------------|------------|-----------|
| <b>Social Grade</b>          |            |           |            |            |           |
| AB                           | 50 (20.9)  | 34 (14.2) | 51 (21.3)  | 70 (29.3)  | 34 (14.2) |
| C1                           | 88 (23.8)  | 76 (20.5) | 76 (20.5)  | 91 (24.6)  | 39 (10.5) |
| C2                           | 41 (17.4)  | 42 (17.8) | 59 (25.0)  | 62 (26.3)  | 32 (13.6) |
| D                            | 29 (17.9)  | 23 (14.2) | 44 (27.2)  | 42 (25.9)  | 24 (14.8) |
| E                            | 26 (19.0)  | 17 (12.4) | 37 (27.0)  | 41 (29.9)  | 16 (11.7) |
| <b>Smoking Status</b>        |            |           |            |            |           |
| Never smoked                 | 104 (18.2) | 99 (17.3) | 135 (23.6) | 167 (29.1) | 68 (11.9) |
| Previous smoker              | 75 (26.7)  | 48 (17.1) | 66 (23.5)  | 62 (22.1)  | 30 (10.7) |
| Current (tried quitting)     | 32 (18.3)  | 27 (15.4) | 37 (21.1)  | 43 (24.6)  | 36 (20.6) |
| Current (not tried quitting) | 13 (20.6)  | 13 (20.6) | 14 (22.2)  | 16 (25.4)  | 7 (11.1)  |
| Refused to answer            | 10 (19.2)  | 5 (9.6)   | 15 (28.8)  | 18 (34.6)  | 4 (7.7)   |
| <b>Area</b>                  |            |           |            |            |           |
| North                        | 19 (24.7)  | 18 (23.4) | 11 (14.3)  | 17 (22.1)  | 12 (15.6) |
| North West                   | 15 (10.6)  | 26 (18.3) | 42 (29.6)  | 42 (29.6)  | 17 (12.0) |
| Yorks Hum                    | 30 (28.8)  | 11 (10.6) | 20 (19.2)  | 26 (25.0)  | 17 (16.3) |
| East Midlands                | 24 (22.0)  | 24 (22.0) | 25 (22.9)  | 28 (25.7)  | 8 (7.3)   |
| West Midlands                | 19 (28.8)  | 9 (13.6)  | 15 (22.7)  | 17 (25.8)  | 6 (9.1)   |
| East Anglia                  | 10 (24.4)  | 6 (14.6)  | 8 (19.5)   | 9 (22.0)   | 8 (19.5)  |
| South East                   | 9 (11.1)   | 8 (9.9)   | 25 (30.9)  | 23 (28.4)  | 16 (19.8) |
| South West                   | 53 (26.5)  | 35 (17.5) | 56 (28.0)  | 43 (21.5)  | 13 (6.5)  |
| London                       | 8 (5.4)    | 25 (16.8) | 34 (22.8)  | 59 (39.6)  | 23 (15.4) |
| Wales                        | 20 (30.3)  | 7 (10.6)  | 9 (13.6)   | 17 (25.8)  | 13 (19.7) |
| Scotland                     | 27 (24.8)  | 23 (21.1) | 22 (20.2)  | 25 (22.9)  | 12 (11.0) |

*SD = strongly disagree, D = disagree, N = neither agree nor disagree, A = agree, SA = strongly agree; cells are number (row percentages).*



**Table 12** Simple univariable and multiple ordered logit regression models for response to “Additional funding for local health services if they reach targets for the number of women who prove that they have stopped smoking during pregnancy”

| Variable                          | Simple regression model |              |         | Multiple regression model |              |         |
|-----------------------------------|-------------------------|--------------|---------|---------------------------|--------------|---------|
|                                   | OR                      | 95% CI       | P value | OR                        | 95% CI       | P value |
| <b>Age category</b>               |                         |              |         |                           |              |         |
| 18 - 24                           | 2.24                    | (1.60, 3.14) | < 0.001 | 2.28                      | (1.50, 3.49) | < 0.001 |
| 25 - 34                           | 2.05                    | (1.47, 2.86) | < 0.001 | 1.83                      | (1.26, 2.67) | 0.002   |
| 35 - 44                           | 2.15                    | (1.54, 3.00) | < 0.001 | 1.90                      | (1.32, 2.74) | 0.001   |
| 45 - 54                           | 1.58                    | (1.11, 2.23) | 0.010   | 1.57                      | (1.08, 2.28) | 0.017   |
| 55 - 59                           | 1.46                    | (0.91, 2.35) | 0.11    | 1.43                      | (0.87, 2.34) | 0.16    |
| 60 - 64                           | 1.18                    | (0.77, 1.80) | 0.44    | 1.05                      | (0.68, 1.63) | 0.82    |
| <b>Breastfeeding</b>              |                         |              |         |                           |              |         |
| Children breastfed                | 1.02                    | (0.83, 1.26) | 0.83    | 1.12                      | (0.83, 1.50) | 0.45    |
| <b>Children</b>                   |                         |              |         |                           |              |         |
| Have children                     | 0.92                    | (0.74, 1.13) | 0.42    | 1.08                      | (0.79, 1.49) | 0.62    |
| <b>Ethnicity</b>                  |                         |              |         |                           |              |         |
| Other ethnicity                   | 1.91                    | (1.43, 2.56) | < 0.001 | 1.27                      | (0.90, 1.79) | 0.18    |
| <b>Sex</b>                        |                         |              |         |                           |              |         |
| Female                            | 0.90                    | (0.73, 1.10) | 0.30    | 0.85                      | (0.69, 1.06) | 0.16    |
| <b>Education</b>                  |                         |              |         |                           |              |         |
| GCSE                              | 0.74                    | (0.56, 0.97) | 0.030   | 0.71                      | (0.51, 0.97) | 0.033   |
| A-level                           | 0.77                    | (0.56, 1.06) | 0.11    | 0.68                      | (0.48, 0.97) | 0.032   |
| No Formal qualification           | 0.70                    | (0.51, 0.97) | 0.032   | 0.90                      | (0.60, 1.35) | 0.60    |
| Other, still studying, don't know | 0.93                    | (0.64, 1.36) | 0.71    | 1.12                      | (0.73, 1.70) | 0.60    |

| Variable                     | Simple regression model |              |         | Multiple regression model |              |         |
|------------------------------|-------------------------|--------------|---------|---------------------------|--------------|---------|
|                              | OR                      | 95% CI       | P value | OR                        | 95% CI       | P value |
| <b>Social Grade</b>          |                         |              |         |                           |              |         |
| C1                           | 0.72                    | (0.54, 0.96) | 0.025   | 0.68                      | (0.50, 0.94) | 0.019   |
| C2                           | 0.97                    | (0.70, 1.34) | 0.86    | 0.88                      | (0.60, 1.28) | 0.49    |
| D                            | 1.03                    | (0.72, 1.47) | 0.85    | 0.97                      | (0.64, 1.47) | 0.88    |
| E                            | 1.00                    | (0.69, 1.46) | 0.99    | 0.94                      | (0.60, 1.47) | 0.78    |
| <b>Smoking Status</b>        |                         |              |         |                           |              |         |
| Previous smoker              | 0.70                    | (0.54, 0.90) | 0.006   | 0.86                      | (0.65, 1.13) | 0.27    |
| Current (tried quitting)     | 1.24                    | (0.91, 1.68) | 0.18    | 1.26                      | (0.91, 1.75) | 0.16    |
| Current (not tried quitting) | 0.83                    | (0.53, 1.32) | 0.44    | 0.87                      | (0.54, 1.41) | 0.58    |
| Refused to answer            | 1.04                    | (0.63, 1.69) | 0.89    | 0.96                      | (0.57, 1.59) | 0.86    |
| <b>Area</b>                  |                         |              |         |                           |              |         |
| North                        | 0.45                    | (0.27, 0.73) | 0.001   | 0.57                      | (0.34, 0.96) | 0.036   |
| North West                   | 0.68                    | (0.46, 1.01) | 0.058   | 0.83                      | (0.55, 1.27) | 0.39    |
| Yorks Hum                    | 0.51                    | (0.32, 0.81) | 0.004   | 0.60                      | (0.37, 0.98) | 0.040   |
| East Midlands                | 0.42                    | (0.27, 0.64) | < 0.001 | 0.47                      | (0.30, 0.74) | 0.001   |
| West Midlands                | 0.40                    | (0.24, 0.68) | 0.001   | 0.56                      | (0.32, 0.96) | 0.037   |
| East Anglia                  | 0.57                    | (0.30, 1.08) | 0.086   | 0.72                      | (0.37, 1.39) | 0.33    |
| South East                   | 0.93                    | (0.58, 1.48) | 0.75    | 1.42                      | (0.86, 2.35) | 0.17    |
| South West                   | 0.36                    | (0.25, 0.52) | < 0.001 | 0.53                      | (0.35, 0.80) | 0.002   |
| Wales                        | 0.56                    | (0.32, 0.96) | 0.035   | 0.81                      | (0.46, 1.45) | 0.48    |
| Scotland                     | 0.41                    | (0.27, 0.64) | < 0.001 | 0.55                      | (0.34, 0.88) | 0.014   |

*OR is odds ratio; CI is confidence interval; simple univariable regression models included only the categories for that variable; multiple regression include all variables. Reference categories were 65 and over (age), no children breastfed, no children, white ethnicity, male sex, university education social grade A and B combined, never smoked, and London.*

**Table 13** Response to “Additional funding for local health services if they reach targets for the number of women who prove that they are breastfeeding” by independent variables

| Variable                          | SD         | D          | N          | A          | SA         |
|-----------------------------------|------------|------------|------------|------------|------------|
| <b>Age category</b>               |            |            |            |            |            |
| 18 – 24                           | 19 (11.2)  | 33 (19.4)  | 46 (27.1)  | 56 (32.9)  | 16 (9.4)   |
| 25 – 34                           | 22 (12.6)  | 27 (15.4)  | 55 (31.4)  | 49 (28.0)  | 22 (12.6)  |
| 35 – 44                           | 25 (13.8)  | 35 (19.3)  | 37 (20.4)  | 52 (28.7)  | 32 (17.7)  |
| 45 – 54                           | 32 (20.1)  | 32 (20.1)  | 39 (24.5)  | 36 (22.6)  | 20 (12.6)  |
| 55 – 59                           | 18 (25.0)  | 16 (22.2)  | 12 (16.7)  | 17 (23.6)  | 9 (12.5)   |
| 60 – 64                           | 34 (36.2)  | 14 (14.9)  | 21 (22.3)  | 15 (16.0)  | 10 (10.6)  |
| 65+                               | 86 (29.4)  | 48 (16.4)  | 77 (26.3)  | 53 (18.1)  | 29 (9.9)   |
| <b>Breastfeeding</b>              |            |            |            |            |            |
| Children not breastfed            | 117 (18.5) | 115 (18.2) | 192 (30.4) | 146 (23.1) | 62 (9.8)   |
| Children breastfed                | 119 (23.2) | 90 (17.6)  | 95 (18.6)  | 132 (25.8) | 76 (14.8)  |
| <b>Children</b>                   |            |            |            |            |            |
| No children                       | 63 (15.7)  | 72 (17.9)  | 123 (30.6) | 107 (26.6) | 37 (9.2)   |
| Have children                     | 173 (23.3) | 133 (17.9) | 164 (22.1) | 171 (23.0) | 101 (13.6) |
| <b>Ethnicity</b>                  |            |            |            |            |            |
| White                             | 229 (23.2) | 189 (19.2) | 249 (25.3) | 214 (21.7) | 104 (10.6) |
| Other ethnicity                   | 7 (4.4)    | 16 (10.1)  | 38 (23.9)  | 64 (40.3)  | 34 (21.4)  |
| <b>Sex</b>                        |            |            |            |            |            |
| Male                              | 97 (18.0)  | 85 (15.7)  | 163 (30.2) | 131 (24.3) | 64 (11.9)  |
| Female                            | 139 (23.0) | 120 (19.9) | 124 (20.5) | 147 (24.3) | 74 (12.3)  |
| <b>Education</b>                  |            |            |            |            |            |
| University                        | 58 (19.7)  | 52 (17.6)  | 70 (23.7)  | 79 (26.8)  | 36 (12.2)  |
| GCSE                              | 69 (20.2)  | 65 (19.0)  | 89 (26.0)  | 79 (23.1)  | 40 (11.7)  |
| A-level                           | 47 (24.4)  | 29 (15.0)  | 49 (25.4)  | 43 (22.3)  | 25 (13.0)  |
| No Formal qualification           | 42 (21.3)  | 34 (17.3)  | 58 (29.4)  | 41 (20.8)  | 22 (11.2)  |
| Other, still studying, don't know | 20 (17.1)  | 25 (21.4)  | 21 (17.9)  | 36 (30.8)  | 15 (12.8)  |

| Variable                     | SD         | D         | N          | A          | SA        |
|------------------------------|------------|-----------|------------|------------|-----------|
| <b>Social Grade</b>          |            |           |            |            |           |
| AB                           | 54 (22.6)  | 40 (16.7) | 59 (24.7)  | 53 (22.2)  | 33 (13.8) |
| C1                           | 84 (22.7)  | 73 (19.7) | 91 (24.6)  | 89 (24.1)  | 33 (8.9)  |
| C2                           | 46 (19.5)  | 37 (15.7) | 71 (30.1)  | 55 (23.3)  | 27 (11.4) |
| D                            | 27 (16.7)  | 29 (17.9) | 37 (22.8)  | 44 (27.2)  | 25 (15.4) |
| E                            | 25 (18.2)  | 26 (19.0) | 29 (21.2)  | 37 (27.0)  | 20 (14.6) |
| <b>Smoking Status</b>        |            |           |            |            |           |
| Never smoked                 | 108 (18.8) | 99 (17.3) | 137 (23.9) | 166 (29.0) | 63 (11.0) |
| Previous smoker              | 73 (26.0)  | 57 (20.3) | 70 (24.9)  | 52 (18.5)  | 29 (10.3) |
| Current (tried quitting)     | 32 (18.3)  | 31 (17.7) | 48 (27.4)  | 29 (16.6)  | 35 (20.0) |
| Current (not tried quitting) | 12 (19.0)  | 13 (20.6) | 17 (27.0)  | 15 (23.8)  | 6 (9.5)   |
| Refused to answer            | 11 (21.2)  | 5 (9.6)   | 15 (28.8)  | 16 (30.8)  | 5 (9.6)   |
| <b>Area</b>                  |            |           |            |            |           |
| North                        | 14 (18.2)  | 21 (27.3) | 17 (22.1)  | 15 (19.5)  | 10 (13.0) |
| North West                   | 17 (12.0)  | 26 (18.3) | 44 (31.0)  | 35 (24.6)  | 20 (14.1) |
| Yorks Hum                    | 25 (24.0)  | 15 (14.4) | 26 (25.0)  | 24 (23.1)  | 14 (13.5) |
| East Midlands                | 21 (19.3)  | 21 (19.3) | 31 (28.4)  | 30 (27.5)  | 6 (5.5)   |
| West Midlands                | 17 (25.8)  | 15 (22.7) | 16 (24.2)  | 14 (21.2)  | 4 (6.1)   |
| East Anglia                  | 6 (14.6)   | 7 (17.1)  | 7 (17.1)   | 10 (24.4)  | 11 (26.8) |
| South East                   | 15 (18.5)  | 8 (9.9)   | 23 (28.4)  | 23 (28.4)  | 12 (14.8) |
| South West                   | 56 (28.0)  | 33 (16.5) | 61 (30.5)  | 32 (16.0)  | 18 (9.0)  |
| London                       | 13 (8.7)   | 26 (17.4) | 26 (17.4)  | 65 (43.6)  | 19 (12.8) |
| Wales                        | 20 (30.3)  | 11 (16.7) | 14 (21.2)  | 10 (15.2)  | 11 (16.7) |
| Scotland                     | 32 (29.4)  | 22 (20.2) | 22 (20.2)  | 20 (18.3)  | 13 (11.9) |

*SD = strongly disagree, D = disagree, N = neither agree nor disagree, A = agree, SA = strongly agree; cells are number (row percentages).*

**Table 14** Simple univariable and multiple ordered logit regression models for response to “Additional funding for local health services if they reach targets for the number of women who prove that they are breastfeeding”

| Variable                          | Simple regression model |              |         | Multiple regression model |              |         |
|-----------------------------------|-------------------------|--------------|---------|---------------------------|--------------|---------|
|                                   | OR                      | 95% CI       | P value | OR                        | 95% CI       | P value |
| <b>Age category</b>               |                         |              |         |                           |              |         |
| 18 - 24                           | 1.90                    | (1.36, 2.64) | < 0.001 | 1.63                      | (1.07, 2.49) | 0.022   |
| 25 - 34                           | 1.96                    | (1.41, 2.72) | < 0.001 | 1.64                      | (1.13, 2.38) | 0.010   |
| 35 - 44                           | 2.14                    | (1.53, 3.00) | < 0.001 | 1.91                      | (1.32, 2.76) | 0.001   |
| 45 - 54                           | 1.41                    | (1.00, 1.99) | 0.051   | 1.38                      | (0.95, 2.00) | 0.088   |
| 55 - 59                           | 1.21                    | (0.76, 1.94) | 0.43    | 1.23                      | (0.76, 2.01) | 0.40    |
| 60 - 64                           | 0.81                    | (0.53, 1.25) | 0.34    | 0.79                      | (0.50, 1.23) | 0.30    |
| <b>Breastfeeding</b>              |                         |              |         |                           |              |         |
| Children breastfed                | 1.07                    | (0.87, 1.32) | 0.54    | 1.20                      | (0.89, 1.61) | 0.24    |
| <b>Children</b>                   |                         |              |         |                           |              |         |
| Have children                     | 0.88                    | (0.71, 1.09) | 0.23    | 0.97                      | (0.71, 1.33) | 0.86    |
| <b>Ethnicity</b>                  |                         |              |         |                           |              |         |
| Other ethnicity                   | 3.23                    | (2.40, 4.35) | < 0.001 | 2.31                      | (1.63, 3.29) | < 0.001 |
| <b>Sex</b>                        |                         |              |         |                           |              |         |
| Female                            | 0.84                    | (0.68, 1.03) | 0.099   | 0.85                      | (0.69, 1.06) | 0.15    |
| <b>Education</b>                  |                         |              |         |                           |              |         |
| GCSE                              | 0.90                    | (0.68, 1.19) | 0.47    | 0.92                      | (0.67, 1.25) | 0.58    |
| A-level                           | 0.87                    | (0.63, 1.21) | 0.41    | 0.86                      | (0.61, 1.22) | 0.40    |
| No Formal qualification           | 0.85                    | (0.62, 1.18) | 0.33    | 1.13                      | (0.76, 1.67) | 0.56    |
| Other, still studying, don't know | 1.10                    | (0.75, 1.61) | 0.62    | 1.24                      | (0.81, 1.89) | 0.32    |

| Variable                     | Simple regression model |              |         | Multiple regression model |              |         |
|------------------------------|-------------------------|--------------|---------|---------------------------|--------------|---------|
|                              | OR                      | 95% CI       | P value | OR                        | 95% CI       | P value |
| <b>Social Grade</b>          |                         |              |         |                           |              |         |
| C1                           | 0.87                    | (0.65, 1.16) | 0.33    | 0.76                      | (0.55, 1.04) | 0.086   |
| C2                           | 1.05                    | (0.76, 1.44) | 0.77    | 0.84                      | (0.57, 1.22) | 0.35    |
| D                            | 1.30                    | (0.91, 1.86) | 0.15    | 1.07                      | (0.70, 1.62) | 0.77    |
| E                            | 1.20                    | (0.82, 1.75) | 0.34    | 0.96                      | (0.62, 1.50) | 0.86    |
| <b>Smoking Status</b>        |                         |              |         |                           |              |         |
| Previous smoker              | 0.66                    | (0.52, 0.86) | 0.002   | 0.83                      | (0.63, 1.09) | 0.18    |
| Current (tried quitting)     | 1.07                    | (0.79, 1.45) | 0.67    | 1.08                      | (0.78, 1.49) | 0.64    |
| Current (not tried quitting) | 0.85                    | (0.54, 1.33) | 0.47    | 0.80                      | (0.50, 1.28) | 0.34    |
| Refused to answer            | 1.04                    | (0.63, 1.71) | 0.89    | 0.87                      | (0.52, 1.45) | 0.60    |
| <b>Area</b>                  |                         |              |         |                           |              |         |
| North                        | 0.48                    | (0.30, 0.78) | 0.003   | 0.76                      | (0.46, 1.27) | 0.29    |
| North West                   | 0.71                    | (0.47, 1.05) | 0.086   | 1.00                      | (0.66, 1.53) | 0.98    |
| Yorks Hum                    | 0.53                    | (0.34, 0.83) | 0.005   | 0.79                      | (0.49, 1.29) | 0.35    |
| East Midlands                | 0.49                    | (0.32, 0.75) | 0.001   | 0.62                      | (0.40, 0.97) | 0.036   |
| West Midlands                | 0.36                    | (0.22, 0.60) | < 0.001 | 0.64                      | (0.37, 1.10) | 0.11    |
| East Anglia                  | 1.03                    | (0.54, 1.95) | 0.93    | 1.55                      | (0.79, 3.02) | 0.20    |
| South East                   | 0.74                    | (0.46, 1.19) | 0.21    | 1.31                      | (0.79, 2.19) | 0.30    |
| South West                   | 0.37                    | (0.25, 0.53) | < 0.001 | 0.65                      | (0.43, 0.99) | 0.044   |
| Wales                        | 0.41                    | (0.24, 0.69) | 0.001   | 0.75                      | (0.42, 1.31) | 0.31    |
| Scotland                     | 0.37                    | (0.24, 0.58) | < 0.001 | 0.61                      | (0.37, 0.99) | 0.046   |

*OR is odds ratio; CI is confidence interval; simple univariable regression models included only the categories for that variable; multiple regression include all variables. Reference categories were 65 and over (age), no children breastfed, no children, white ethnicity, male sex, university education social grade A and B combined, never smoked, and London.*

**Table 15** Results from the two part model to estimate the acceptable values for shopping voucher among those who agreed with providing vouchers to mothers for smoking cessation

|                                                    | Probit (Agree or not) |        |       |                 | Amount of shopping voucher |        |       |                 |
|----------------------------------------------------|-----------------------|--------|-------|-----------------|----------------------------|--------|-------|-----------------|
|                                                    | $\beta$               | 95% CI |       | <i>p</i> -value | $\beta$                    | 95% CI |       | <i>p</i> -value |
| AGE                                                | -0.01                 | -0.02  | 0.00  | 0.10            | -0.09                      | -0.27  | 0.09  | 0.33            |
| Region (base category: Greater London)             |                       |        |       |                 |                            |        |       |                 |
| North                                              | -0.40                 | -0.77  | -0.03 | 0.04            | -4.07                      | -13.28 | 5.15  | 0.39            |
| North West                                         | 0.17                  | -0.15  | 0.48  | 0.30            | -0.59                      | -7.31  | 6.13  | 0.86            |
| Yorks and Humberside                               | -0.27                 | -0.61  | 0.08  | 0.13            | -3.80                      | -12.28 | 4.69  | 0.38            |
| West Midlands                                      | -0.31                 | -0.63  | 0.02  | 0.07            | -3.65                      | -11.57 | 4.27  | 0.37            |
| East Midlands                                      | -0.18                 | -0.56  | 0.21  | 0.38            | -8.59                      | -18.26 | 1.08  | 0.08            |
| East Anglia                                        | -0.02                 | -0.48  | 0.43  | 0.92            | 5.56                       | -4.82  | 15.94 | 0.29            |
| South West                                         | 0.22                  | -0.15  | 0.59  | 0.24            | -9.13                      | -16.14 | -2.12 | 0.01            |
| South East                                         | 0.07                  | -0.23  | 0.37  | 0.64            | -8.80                      | -15.09 | -2.51 | 0.01            |
| Wales                                              | -0.40                 | -0.79  | -0.01 | 0.05            | -2.82                      | -12.40 | 6.76  | 0.56            |
| Scotland                                           | -0.14                 | -0.49  | 0.20  | 0.42            | -6.43                      | -14.83 | 1.97  | 0.13            |
| Education (base category: University)              |                       |        |       |                 |                            |        |       |                 |
| GCSE                                               | -0.30                 | -0.53  | -0.07 | 0.01            | -2.03                      | -6.74  | 2.68  | 0.40            |
| A-level                                            | -0.35                 | -0.60  | -0.10 | 0.01            | -4.07                      | -9.35  | 1.22  | 0.13            |
| No formal qualification                            | -0.07                 | -0.36  | 0.21  | 0.62            | 2.20                       | -3.95  | 8.35  | 0.48            |
| Other, still studying, do not know                 | -0.12                 | -0.42  | 0.18  | 0.42            | -3.97                      | -10.24 | 2.30  | 0.21            |
| Smoking status (base category: Never smoker)       |                       |        |       |                 |                            |        |       |                 |
| Previous smoker                                    | -0.02                 | -0.22  | 0.17  | 0.81            | -1.04                      | -5.16  | 3.08  | 0.62            |
| Current (tried quitting)                           | 0.24                  | 0.01   | 0.47  | 0.04            | 5.27                       | 0.00   | 10.54 | 0.05            |
| Current (not tried quitting)                       | 0.05                  | -0.30  | 0.41  | 0.76            | 3.53                       | -5.31  | 12.37 | 0.43            |
| Refused to answer                                  | 0.14                  | -0.25  | 0.52  | 0.49            | -3.26                      | -9.64  | 3.12  | 0.32            |
| Breastfeeding experience (base category: no child) |                       |        |       |                 |                            |        |       |                 |
| Yes                                                | 0.22                  | 0.03   | 0.42  | 0.02            | 4.59                       | 0.46   | 8.73  | 0.03            |
| No                                                 | 0.17                  | -0.05  | 0.39  | 0.14            | -0.55                      | -5.57  | 4.47  | 0.83            |

|                                         | Probit (Agree or not) |             |                 | Amount of shopping voucher |             |                 |
|-----------------------------------------|-----------------------|-------------|-----------------|----------------------------|-------------|-----------------|
|                                         | $\beta$               | 95% CI      | <i>p</i> -value | $\beta$                    | 95% CI      | <i>p</i> -value |
| Social grade (base category:<br>A or B) |                       |             |                 |                            |             |                 |
| C1                                      | 0.01                  | -0.21 0.24  | 0.90            | -0.21                      | -5.02 4.60  | 0.93            |
| C2                                      | 0.13                  | -0.14 0.40  | 0.35            | 3.77                       | -2.03 9.57  | 0.20            |
| D                                       | 0.09                  | -0.21 0.39  | 0.55            | -1.06                      | -7.35 5.24  | 0.74            |
| E                                       | 0.41                  | 0.09 0.73   | 0.01            | 1.35                       | -5.56 8.25  | 0.70            |
| Childbearing age (=1 if<br>age<45)      | 0.08                  | -0.22 0.38  | 0.62            | 1.96                       | -4.80 8.71  | 0.57            |
| Female (=1 if female)                   | -0.27                 | -0.43 -0.11 | 0.00            | 0.79                       | -2.59 4.18  | 0.64            |
| White (=1 if ethnic origin is<br>white) | -0.31                 | -0.57 -0.05 | 0.02            | -5.21                      | -10.87 0.44 | 0.07            |
| Constant                                | 0.90                  | 0.31 1.48   | 0.00            | 34.22                      | 21.52 46.92 | 0.00            |
| R <sup>2</sup>                          |                       |             |                 |                            | 0.1065      |                 |
| Pseudo R <sup>2</sup>                   |                       | 0.0598      |                 |                            |             |                 |
| N                                       |                       | 1,144       |                 |                            | 660         |                 |



**Table 16** Results from the two part model to estimate the acceptability of targeting incentives to low income women only among those who agreed with providing vouchers to mothers for smoking cessation

|                                                    | Probit (Agree or not) |        |            |         | Probit (Women on low income or all) |            |      |      |
|----------------------------------------------------|-----------------------|--------|------------|---------|-------------------------------------|------------|------|------|
|                                                    | $\beta$               | 95% CI | $p$ -value | $\beta$ | 95% CI                              | $p$ -value |      |      |
| AGE                                                | -0.01                 | -0.02  | 0.00       | 0.10    | 0.00                                | -0.01      | 0.01 | 0.66 |
| Region (base category: Greater London)             |                       |        |            |         |                                     |            |      |      |
| North                                              | -0.40                 | -0.77  | -0.03      | 0.04    | -0.19                               | -0.71      | 0.34 | 0.48 |
| North West                                         | 0.17                  | -0.15  | 0.48       | 0.30    | 0.12                                | -0.25      | 0.48 | 0.52 |
| Yorks and Humberside                               | -0.27                 | -0.61  | 0.08       | 0.13    | -0.09                               | -0.55      | 0.36 | 0.69 |
| West Midlands                                      | -0.31                 | -0.63  | 0.02       | 0.07    | -0.01                               | -0.44      | 0.43 | 0.97 |
| East Midlands                                      | -0.18                 | -0.56  | 0.21       | 0.38    | -0.43                               | -0.98      | 0.12 | 0.13 |
| East Anglia                                        | -0.02                 | -0.48  | 0.43       | 0.92    | 0.35                                | -0.22      | 0.92 | 0.23 |
| South West                                         | 0.22                  | -0.15  | 0.59       | 0.24    | 0.48                                | 0.02       | 0.93 | 0.04 |
| South East                                         | 0.07                  | -0.23  | 0.37       | 0.64    | 0.17                                | -0.21      | 0.54 | 0.38 |
| Wales                                              | -0.40                 | -0.79  | -0.01      | 0.05    | -0.12                               | -0.70      | 0.46 | 0.68 |
| Scotland                                           | -0.14                 | -0.49  | 0.20       | 0.42    | 0.81                                | 0.34       | 1.27 | 0.00 |
| Education (base category: University)              |                       |        |            |         |                                     |            |      |      |
| GCSE                                               | -0.30                 | -0.53  | -0.07      | 0.01    | -0.22                               | -0.52      | 0.09 | 0.16 |
| A-level                                            | -0.35                 | -0.60  | -0.10      | 0.01    | 0.09                                | -0.24      | 0.42 | 0.59 |
| No formal qualification                            | -0.07                 | -0.36  | 0.21       | 0.62    | -0.28                               | -0.66      | 0.09 | 0.14 |
| Other, still studying, do not know                 | -0.12                 | -0.42  | 0.18       | 0.42    | -0.14                               | -0.52      | 0.25 | 0.49 |
| Smoking status (base category: Never smoker)       |                       |        |            |         |                                     |            |      |      |
| Previous smoker                                    | -0.02                 | -0.22  | 0.17       | 0.81    | -0.08                               | -0.35      | 0.19 | 0.57 |
| Current (tried quitting)                           | 0.24                  | 0.01   | 0.47       | 0.04    | -0.04                               | -0.33      | 0.24 | 0.77 |
| Current (not tried quitting)                       | 0.05                  | -0.30  | 0.41       | 0.76    | -0.12                               | -0.57      | 0.32 | 0.59 |
| Refused to answer                                  | 0.14                  | -0.25  | 0.52       | 0.49    | -0.00                               | -0.46      | 0.46 | 0.99 |
| Breastfeeding experience (base category: no child) |                       |        |            |         |                                     |            |      |      |
| Yes                                                | 0.22                  | 0.03   | 0.42       | 0.02    | 0.08                                | -0.17      | 0.33 | 0.53 |

|                                      | Probit (Agree or not) |        |       |                 | Probit (Women on low income or all) |        |      |                 |
|--------------------------------------|-----------------------|--------|-------|-----------------|-------------------------------------|--------|------|-----------------|
|                                      | $\beta$               | 95% CI |       | <i>p</i> -value | $\beta$                             | 95% CI |      | <i>p</i> -value |
| No                                   | 0.17                  | -0.05  | 0.39  | 0.14            | 0.20                                | -0.09  | 0.49 | 0.18            |
| Social grade (base category: A or B) |                       |        |       |                 |                                     |        |      |                 |
| C1                                   | 0.01                  | -0.21  | 0.24  | 0.90            | 0.15                                | -0.15  | 0.46 | 0.32            |
| C2                                   | 0.13                  | -0.14  | 0.40  | 0.35            | 0.12                                | -0.24  | 0.49 | 0.51            |
| D                                    | 0.09                  | -0.21  | 0.39  | 0.55            | 0.23                                | -0.16  | 0.63 | 0.25            |
| E                                    | 0.41                  | 0.09   | 0.73  | 0.01            | 0.18                                | -0.23  | 0.59 | 0.38            |
| Childbearing age (=1 if age<45)      | 0.08                  | -0.22  | 0.38  | 0.62            | -0.00                               | -0.40  | 0.39 | 0.99            |
| Female (=1 if female)                | -0.27                 | -0.43  | -0.11 | 0.00            | -0.17                               | -0.37  | 0.04 | 0.11            |
| White (=1 if ethnic origin is white) | -0.31                 | -0.57  | -0.05 | 0.02            | 0.12                                | -0.18  | 0.43 | 0.43            |
| Constant                             | 0.90                  | 0.31   | 1.48  | 0.00            | -0.46                               | -1.23  | 0.32 | 0.25            |
| Pseudo R <sup>2</sup>                |                       | 0.0598 |       |                 |                                     | 0.0523 |      |                 |
| N                                    |                       | 1,144  |       |                 |                                     | 660    |      |                 |

**Table 17** Results from the two part model to estimate the acceptable value for shopping voucher among those who agreed with providing vouchers for breastfeeding

|                                                    | Probit (Agree or not) |        |       |                 | Amount of shopping voucher |        |       |                 |
|----------------------------------------------------|-----------------------|--------|-------|-----------------|----------------------------|--------|-------|-----------------|
|                                                    | $\beta$               | 95% CI |       | <i>p</i> -value | $\beta$                    | 95% CI |       | <i>p</i> -value |
| AGE                                                | -0.01                 | -0.01  | 0.00  | 0.18            | -0.12                      | -0.29  | 0.05  | 0.17            |
| Region (base category: Greater London)             |                       |        |       |                 |                            |        |       |                 |
| North                                              | -0.21                 | -0.60  | 0.17  | 0.27            | -2.26                      | -10.77 | 6.25  | 0.60            |
| North West                                         | 0.00                  | -0.32  | 0.33  | 0.98            | -1.36                      | -7.96  | 5.23  | 0.69            |
| Yorks and Humberside                               | -0.25                 | -0.60  | 0.10  | 0.17            | -4.08                      | -12.30 | 4.13  | 0.33            |
| West Midlands                                      | -0.39                 | -0.73  | -0.06 | 0.02            | -4.02                      | -11.15 | 3.10  | 0.27            |
| East Midlands                                      | -0.53                 | -0.93  | -0.13 | 0.01            | -12.68                     | -21.34 | -4.02 | 0.00            |
| East Anglia                                        | -0.09                 | -0.57  | 0.38  | 0.70            | -1.73                      | -12.38 | 8.92  | 0.75            |
| South West                                         | 0.23                  | -0.16  | 0.61  | 0.24            | -7.50                      | -14.56 | -0.45 | 0.04            |
| South East                                         | -0.17                 | -0.47  | 0.14  | 0.29            | -11.37                     | -17.49 | -5.26 | 0.00            |
| Wales                                              | -0.45                 | -0.85  | -0.05 | 0.03            | -10.66                     | -19.14 | -2.18 | 0.01            |
| Scotland                                           | -0.05                 | -0.41  | 0.31  | 0.78            | -11.57                     | -18.62 | -4.52 | 0.00            |
| Education (base category: University)              |                       |        |       |                 |                            |        |       |                 |
| GCSE                                               | 0.05                  | -0.19  | 0.29  | 0.67            | 2.31                       | -2.32  | 6.93  | 0.33            |
| A-level                                            | -0.20                 | -0.45  | 0.05  | 0.11            | 1.74                       | -3.76  | 7.25  | 0.53            |
| No formal qualification                            | 0.31                  | 0.01   | 0.61  | 0.04            | 5.43                       | -0.47  | 11.34 | 0.07            |
| Other, still studying, do not know                 | 0.10                  | -0.21  | 0.40  | 0.54            | -0.13                      | -5.48  | 5.23  | 0.96            |
| Smoking status (base category: Never smoker)       |                       |        |       |                 |                            |        |       |                 |
| Previous smoker                                    | -0.10                 | -0.29  | 0.10  | 0.33            | 0.39                       | -3.85  | 4.64  | 0.86            |
| Current (tried quitting)                           | 0.06                  | -0.17  | 0.30  | 0.61            | 4.70                       | -0.40  | 9.81  | 0.07            |
| Current (not tried quitting)                       | -0.23                 | -0.58  | 0.12  | 0.19            | -1.66                      | -8.43  | 5.11  | 0.63            |
| Refused to answer                                  | 0.09                  | -0.30  | 0.48  | 0.65            | -2.39                      | -9.95  | 5.16  | 0.53            |
| Breastfeeding experience (base category: no child) |                       |        |       |                 |                            |        |       |                 |
| Yes                                                | -0.01                 | -0.20  | 0.18  | 0.91            | 6.88                       | 2.77   | 10.99 | 0.00            |
| No                                                 | -0.16                 | -0.38  | 0.06  | 0.16            | -0.54                      | -4.87  | 3.79  | 0.81            |

|                                         | Probit (Agree or not) |        |            |         | Amount of shopping voucher |            |       |      |
|-----------------------------------------|-----------------------|--------|------------|---------|----------------------------|------------|-------|------|
|                                         | $\beta$               | 95% CI | $p$ -value | $\beta$ | 95% CI                     | $p$ -value |       |      |
| Social grade (base category:<br>A or B) |                       |        |            |         |                            |            |       |      |
| C1                                      | -0.20                 | -0.42  | 0.03       | 0.09    | -3.85                      | -8.80      | 1.09  | 0.13 |
| C2                                      | 0.02                  | -0.26  | 0.29       | 0.91    | -5.36                      | -10.64     | -0.07 | 0.05 |
| D                                       | -0.01                 | -0.31  | 0.30       | 0.95    | -5.43                      | -11.37     | 0.51  | 0.07 |
| E                                       | 0.06                  | -0.26  | 0.39       | 0.70    | -3.42                      | -10.14     | 3.30  | 0.32 |
| Childbearing age (=1 if<br>age<45)      | 0.10                  | -0.20  | 0.40       | 0.52    | 0.35                       | -6.30      | 6.99  | 0.92 |
| Female (=1 if female)                   | -0.33                 | -0.49  | -0.17      | 0.00    | 2.95                       | -0.38      | 6.27  | 0.08 |
| White (=1 if ethnic origin is<br>white) | -0.52                 | -0.81  | -0.23      | 0.00    | -8.44                      | -13.82     | -3.06 | 0.00 |
| Constant                                | 1.38                  | 0.77   | 1.99       | 0.00    | 38.66                      | 26.40      | 50.92 | 0.00 |
| R <sup>2</sup>                          |                       |        |            |         |                            | 0.1390     |       |      |
| Pseudo R <sup>2</sup>                   |                       | 0.0750 |            |         |                            |            |       |      |
| N                                       |                       | 1,144  |            |         |                            | 697        |       |      |

**Table 18** Results from the two part model to estimate the acceptability of targeting to low income women only among those who agreed with providing vouchers for breastfeeding

|                                                    | Probit (Agree or not) |        |            |         | Probit (Women on low income or all) |            |      |      |
|----------------------------------------------------|-----------------------|--------|------------|---------|-------------------------------------|------------|------|------|
|                                                    | $\beta$               | 95% CI | $p$ -value | $\beta$ | 95% CI                              | $p$ -value |      |      |
| AGE                                                | -0.01                 | -0.01  | 0.00       | 0.18    | 0.01                                | -0.00      | 0.02 | 0.10 |
| Region (base category: Greater London)             |                       |        |            |         |                                     |            |      |      |
| North                                              | -0.21                 | -0.60  | 0.17       | 0.27    | -0.05                               | -0.53      | 0.43 | 0.84 |
| North West                                         | 0.00                  | -0.32  | 0.33       | 0.98    | 0.18                                | -0.18      | 0.54 | 0.33 |
| Yorks and Humberside                               | -0.25                 | -0.60  | 0.10       | 0.17    | 0.18                                | -0.25      | 0.61 | 0.41 |
| West Midlands                                      | -0.39                 | -0.73  | -0.06      | 0.02    | -0.07                               | -0.49      | 0.34 | 0.73 |
| East Midlands                                      | -0.53                 | -0.93  | -0.13      | 0.01    | -0.01                               | -0.58      | 0.55 | 0.96 |
| East Anglia                                        | -0.09                 | -0.57  | 0.38       | 0.70    | 0.53                                | -0.04      | 1.10 | 0.07 |
| South West                                         | 0.23                  | -0.16  | 0.61       | 0.24    | 0.65                                | 0.21       | 1.10 | 0.00 |
| South East                                         | -0.17                 | -0.47  | 0.14       | 0.29    | 0.18                                | -0.19      | 0.55 | 0.34 |
| Wales                                              | -0.45                 | -0.85  | -0.05      | 0.03    | 0.31                                | -0.24      | 0.86 | 0.27 |
| Scotland                                           | -0.05                 | -0.41  | 0.31       | 0.78    | 0.60                                | 0.18       | 1.03 | 0.01 |
| Education (base category: University)              |                       |        |            |         |                                     |            |      |      |
| GCSE                                               | 0.05                  | -0.19  | 0.29       | 0.67    | 0.06                                | -0.23      | 0.35 | 0.68 |
| A-level                                            | -0.20                 | -0.45  | 0.05       | 0.11    | -0.00                               | -0.32      | 0.32 | 1.00 |
| No formal qualification                            | 0.31                  | 0.01   | 0.61       | 0.04    | 0.11                                | -0.26      | 0.49 | 0.55 |
| Other, still studying, do not know                 | 0.10                  | -0.21  | 0.40       | 0.54    | 0.24                                | -0.14      | 0.62 | 0.22 |
| Smoking status (base category: Never smoker)       |                       |        |            |         |                                     |            |      |      |
| Previous smoker                                    | -0.10                 | -0.29  | 0.10       | 0.33    | -0.07                               | -0.34      | 0.19 | 0.59 |
| Current (tried quitting)                           | 0.06                  | -0.17  | 0.30       | 0.61    | -0.10                               | -0.38      | 0.19 | 0.50 |
| Current (not tried quitting)                       | -0.23                 | -0.58  | 0.12       | 0.19    | -0.13                               | -0.56      | 0.30 | 0.56 |
| Refused to answer                                  | 0.09                  | -0.30  | 0.48       | 0.65    | 0.13                                | -0.31      | 0.57 | 0.56 |
| Breastfeeding experience (base category: no child) |                       |        |            |         |                                     |            |      |      |
| Yes                                                | -0.01                 | -0.20  | 0.18       | 0.91    | -0.06                               | -0.30      | 0.18 | 0.62 |

|                                      | Probit (Agree or not) |        |       |                 | Probit (Women on low income or all) |        |       |                 |
|--------------------------------------|-----------------------|--------|-------|-----------------|-------------------------------------|--------|-------|-----------------|
|                                      | $\beta$               | 95% CI |       | <i>p</i> -value | $\beta$                             | 95% CI |       | <i>p</i> -value |
| No                                   | -0.16                 | -0.38  | 0.06  | 0.16            | 0.04                                | -0.24  | 0.33  | 0.76            |
| Social grade (base category: A or B) |                       |        |       |                 |                                     |        |       |                 |
| C1                                   | -0.20                 | -0.42  | 0.03  | 0.09            | -0.20                               | -0.49  | 0.10  | 0.19            |
| C2                                   | 0.02                  | -0.26  | 0.29  | 0.91            | -0.09                               | -0.44  | 0.25  | 0.60            |
| D                                    | -0.01                 | -0.31  | 0.30  | 0.95            | -0.11                               | -0.48  | 0.27  | 0.58            |
| E                                    | 0.06                  | -0.26  | 0.39  | 0.70            | -0.15                               | -0.55  | 0.25  | 0.45            |
| Childbearing age (=1 if age<45)      | 0.10                  | -0.20  | 0.40  | 0.52            | 0.23                                | -0.16  | 0.61  | 0.25            |
| Female (=1 if female)                | -0.33                 | -0.49  | -0.17 | 0.00            | -0.28                               | -0.48  | -0.08 | 0.01            |
| White (=1 if ethnic origin is white) | -0.52                 | -0.81  | -0.23 | 0.00            | -0.13                               | -0.42  | 0.16  | 0.37            |
| Constant                             | 1.38                  | 0.77   | 1.99  | 0.00            | -0.47                               | -1.21  | 0.27  | 0.21            |
| Pseudo R <sup>2</sup>                |                       | 0.0750 |       |                 |                                     | 0.0416 |       |                 |
| N                                    |                       | 1,144  |       |                 |                                     | 660    |       |                 |

## STROBE Statement—checklist of items that should be included in reports of observational studies

|                              | Item No | Recommendation                                                                                                                                                                                                                                                                                                                                                                                                                                                         |      |
|------------------------------|---------|------------------------------------------------------------------------------------------------------------------------------------------------------------------------------------------------------------------------------------------------------------------------------------------------------------------------------------------------------------------------------------------------------------------------------------------------------------------------|------|
| <b>Title and abstract</b>    | 1       | (a) Indicate the study's design with a commonly used term in the title or the abstract                                                                                                                                                                                                                                                                                                                                                                                 | P1/2 |
|                              |         | (b) Provide in the abstract an informative and balanced summary of what was done and what was found                                                                                                                                                                                                                                                                                                                                                                    | P2   |
| <b>Introduction</b>          |         |                                                                                                                                                                                                                                                                                                                                                                                                                                                                        |      |
| Background/rationale         | 2       | Explain the scientific background and rationale for the investigation being reported                                                                                                                                                                                                                                                                                                                                                                                   | P3/4 |
| Objectives                   | 3       | State specific objectives, including any prespecified hypotheses                                                                                                                                                                                                                                                                                                                                                                                                       | P4   |
| <b>Methods</b>               |         |                                                                                                                                                                                                                                                                                                                                                                                                                                                                        |      |
| Study design                 | 4       | Present key elements of study design early in the paper                                                                                                                                                                                                                                                                                                                                                                                                                | P4   |
| Setting                      | 5       | Describe the setting, locations, and relevant dates, including periods of recruitment, exposure, follow-up, and data collection                                                                                                                                                                                                                                                                                                                                        | P4   |
| Participants                 | 6       | (a) <i>Cohort study</i> —Give the eligibility criteria, and the sources and methods of selection of participants. Describe methods of follow-up<br><i>Case-control study</i> —Give the eligibility criteria, and the sources and methods of case ascertainment and control selection. Give the rationale for the choice of cases and controls<br><i>Cross-sectional study</i> —Give the eligibility criteria, and the sources and methods of selection of participants | P4/5 |
|                              |         | (b) <i>Cohort study</i> —For matched studies, give matching criteria and number of exposed and unexposed<br><i>Case-control study</i> —For matched studies, give matching criteria and the number of controls per case                                                                                                                                                                                                                                                 | P4/5 |
| Variables                    | 7       | Clearly define all outcomes, exposures, predictors, potential confounders, and effect modifiers. Give diagnostic criteria, if applicable                                                                                                                                                                                                                                                                                                                               | P5   |
| Data sources/<br>measurement | 8*      | For each variable of interest, give sources of data and details of methods of assessment (measurement). Describe comparability of assessment methods if there is more than one group                                                                                                                                                                                                                                                                                   | P4/5 |
| Bias                         | 9       | Describe any efforts to address potential sources of bias                                                                                                                                                                                                                                                                                                                                                                                                              | P5   |
| Study size                   | 10      | Explain how the study size was arrived at                                                                                                                                                                                                                                                                                                                                                                                                                              | P5   |
| Quantitative variables       | 11      | Explain how quantitative variables were handled in the analyses. If applicable, describe which groupings were chosen and why                                                                                                                                                                                                                                                                                                                                           | P5   |
| Statistical methods          | 12      | (a) Describe all statistical methods, including those used to control for confounding                                                                                                                                                                                                                                                                                                                                                                                  | P5/6 |
|                              |         | (b) Describe any methods used to examine subgroups and interactions                                                                                                                                                                                                                                                                                                                                                                                                    | P5   |
|                              |         | (c) Explain how missing data were addressed                                                                                                                                                                                                                                                                                                                                                                                                                            | P5/6 |
|                              |         | (d) <i>Cohort study</i> —If applicable, explain how loss to follow-up was addressed<br><i>Case-control study</i> —If applicable, explain how matching of cases and controls was addressed<br><i>Cross-sectional study</i> —If applicable, describe analytical methods taking account of sampling strategy                                                                                                                                                              | P5   |
|                              |         | (e) Describe any sensitivity analyses                                                                                                                                                                                                                                                                                                                                                                                                                                  | N/A  |

Continued on next page

| <b>Results</b>           |     |                                                                                                                                                                                                                                                                                                                                                                                                               |                                                            |                                                                                                |     |
|--------------------------|-----|---------------------------------------------------------------------------------------------------------------------------------------------------------------------------------------------------------------------------------------------------------------------------------------------------------------------------------------------------------------------------------------------------------------|------------------------------------------------------------|------------------------------------------------------------------------------------------------|-----|
| Participants             | 13* | (a) Report numbers of individuals at each stage of study—eg numbers potentially eligible, examined for eligibility, confirmed eligible, included in the study, completing follow-up, and analysed<br>(b) Give reasons for non-participation at each stage<br>(c) Consider use of a flow diagram                                                                                                               | P6, Table 1<br><br>N/A                                     |                                                                                                |     |
| Descriptive data         | 14* | (a) Give characteristics of study participants (eg demographic, clinical, social) and information on exposures and potential confounders                                                                                                                                                                                                                                                                      | P6, Table 1                                                |                                                                                                |     |
|                          |     | (b) Indicate number of participants with missing data for each variable of interest                                                                                                                                                                                                                                                                                                                           | P6, Table 1                                                |                                                                                                |     |
|                          |     | (c) <i>Cohort study</i> —Summarise follow-up time (eg, average and total amount)                                                                                                                                                                                                                                                                                                                              | N/A                                                        |                                                                                                |     |
| Outcome data             | 15* | <i>Cohort study</i> —Report numbers of outcome events or summary measures over time                                                                                                                                                                                                                                                                                                                           |                                                            |                                                                                                |     |
|                          |     | <i>Case-control study</i> —Report numbers in each exposure category, or summary measures of exposure                                                                                                                                                                                                                                                                                                          |                                                            |                                                                                                |     |
|                          |     | <i>Cross-sectional study</i> —Report numbers of outcome events or summary measures                                                                                                                                                                                                                                                                                                                            | P6-8                                                       |                                                                                                |     |
| Main results             | 16  | (a) Give unadjusted estimates and, if applicable, confounder-adjusted estimates and their precision (eg, 95% confidence interval). Make clear which confounders were adjusted for and why they were included<br>(b) Report category boundaries when continuous variables were categorized<br>(c) If relevant, consider translating estimates of relative risk into absolute risk for a meaningful time period | P6-8, Tables 2-4, Figure 1, Web appendices of full results |                                                                                                |     |
|                          |     | Other analyses                                                                                                                                                                                                                                                                                                                                                                                                | 17                                                         | Report other analyses done—eg analyses of subgroups and interactions, and sensitivity analyses | N/A |
|                          |     | <b>Discussion</b>                                                                                                                                                                                                                                                                                                                                                                                             |                                                            |                                                                                                |     |
| Key results              | 18  | Summarise key results with reference to study objectives                                                                                                                                                                                                                                                                                                                                                      | P8                                                         |                                                                                                |     |
| Limitations              | 19  | Discuss limitations of the study, taking into account sources of potential bias or imprecision. Discuss both direction and magnitude of any potential bias                                                                                                                                                                                                                                                    | P9                                                         |                                                                                                |     |
| Interpretation           | 20  | Give a cautious overall interpretation of results considering objectives, limitations, multiplicity of analyses, results from similar studies, and other relevant evidence                                                                                                                                                                                                                                    | P9                                                         |                                                                                                |     |
| Generalisability         | 21  | Discuss the generalisability (external validity) of the study results                                                                                                                                                                                                                                                                                                                                         | P9                                                         |                                                                                                |     |
| <b>Other information</b> |     |                                                                                                                                                                                                                                                                                                                                                                                                               |                                                            |                                                                                                |     |
| Funding                  | 22  | Give the source of funding and the role of the funders for the present study and, if applicable, for the original study on which the present article is based                                                                                                                                                                                                                                                 | P12/13                                                     |                                                                                                |     |

\*Give information separately for cases and controls in case-control studies and, if applicable, for exposed and unexposed groups in cohort and cross-sectional studies.



1  
2 **Note:** An Explanation and Elaboration article discusses each checklist item and gives methodological background and  
3 published examples of transparent reporting. The STROBE checklist is best used in conjunction with this article (freely  
4 available on the Web sites of PLoS Medicine at <http://www.plosmedicine.org/>, Annals of Internal Medicine at  
5 <http://www.annals.org/>, and Epidemiology at <http://www.epidem.com/>). Information on the STROBE Initiative is  
6 available at [www.strobe-statement.org](http://www.strobe-statement.org).  
7  
8  
9  
10  
11  
12  
13  
14  
15  
16  
17  
18  
19  
20  
21  
22  
23  
24  
25  
26  
27  
28  
29  
30  
31  
32  
33  
34  
35  
36  
37  
38  
39  
40  
41  
42  
43  
44  
45  
46  
47  
48  
49  
50  
51  
52  
53  
54  
55  
56  
57  
58  
59  
60

For peer review only

# BMJ Open

## Public acceptability of financial incentives for smoking cessation in pregnancy and breastfeeding: a survey of the British public

|                                 |                                                                                                                                                                                                                                                                                                                                                                                                                                                                                                                                                                                                                                                                                                                                          |
|---------------------------------|------------------------------------------------------------------------------------------------------------------------------------------------------------------------------------------------------------------------------------------------------------------------------------------------------------------------------------------------------------------------------------------------------------------------------------------------------------------------------------------------------------------------------------------------------------------------------------------------------------------------------------------------------------------------------------------------------------------------------------------|
| Journal:                        | <i>BMJ Open</i>                                                                                                                                                                                                                                                                                                                                                                                                                                                                                                                                                                                                                                                                                                                          |
| Manuscript ID:                  | bmjopen-2014-005524.R1                                                                                                                                                                                                                                                                                                                                                                                                                                                                                                                                                                                                                                                                                                                   |
| Article Type:                   | Research                                                                                                                                                                                                                                                                                                                                                                                                                                                                                                                                                                                                                                                                                                                                 |
| Date Submitted by the Author:   | 22-Jun-2014                                                                                                                                                                                                                                                                                                                                                                                                                                                                                                                                                                                                                                                                                                                              |
| Complete List of Authors:       | Hoddinott, Pat; University of Stirling, Nursing, Midwifery and Allied Health Professional Research Unit<br>Morgan, Heather; University of Aberdeen, Health Services Research Unit<br>Maclennan, Graeme; University of Aberdeen; University of Aberdeen, Health Services Research Unit<br>Sewel, Kate; Ipsos MORI Scotland,<br>Thomson, Gillian; University of Central Lancashire, Maternal and Infant Nutrition and Nurture Unit<br>Bauld, Linda; University of Stirling, Health Policy and Social Marketing<br>Yi, Deokhee; University of Aberdeen, Health Economics Research Unit<br>Ludbrook, Anne; University of Aberdeen, Health Economics Research Unit<br>Campbell, Marion; University of Aberdeen, Health Services Research Unit |
| <b>Primary Subject Heading</b>: | Public health                                                                                                                                                                                                                                                                                                                                                                                                                                                                                                                                                                                                                                                                                                                            |
| Secondary Subject Heading:      | Public health, Smoking and tobacco, Paediatrics, Obstetrics and gynaecology, Nutrition and metabolism                                                                                                                                                                                                                                                                                                                                                                                                                                                                                                                                                                                                                                    |
| Keywords:                       | PREVENTIVE MEDICINE, PUBLIC HEALTH, SOCIAL MEDICINE                                                                                                                                                                                                                                                                                                                                                                                                                                                                                                                                                                                                                                                                                      |
|                                 |                                                                                                                                                                                                                                                                                                                                                                                                                                                                                                                                                                                                                                                                                                                                          |

SCHOLARONE™  
Manuscripts

**Title: Public acceptability of financial incentives for smoking cessation in pregnancy and breastfeeding: a survey of the British public**

**Authors:** Pat Hoddinott, Heather Morgan, Graeme MacLennan, Kate Sewel, Gill Thomson, Linda Bauld, Deokhee Yi, Anne Ludbrook, Marion K Campbell.

Nursing, Midwifery and Allied Health Professions Research Unit, University of Stirling, Stirling FK9 4LA, UK.

Pat Hoddinott, Chair in Primary Care

Health Services Research Unit, University of Aberdeen, Aberdeen AB25 2ZD, UK.

Heather Morgan, Research Fellow in Social Science

Health Services Research Unit, University of Aberdeen, Aberdeen AB25 2ZD, UK.

Graeme MacLennan, Senior Research Fellow in Statistics

Ipsos MORI Scotland, Edinburgh, EH3 6DH, UK.

Kate Sewel, Senior Researcher

Maternal and Infant Nutrition and Nurture Unit, University of Central Lancashire, Preston PR1 2HE, UK

Gill Thomson, Senior Research Fellow in Social Science

Health Policy and Social Marketing, University of Stirling, Stirling FK9 4LA, UK

Linda Bauld, Professor of Health Policy

Health Economics Research Unit, University of Aberdeen, Aberdeen AB25 2ZD, UK

Deokhee Yi, Research Fellow in Health Economics

Health Economics Research Unit, University of Aberdeen, Aberdeen AB25 2ZD, UK

Anne Ludbrook, Professor of Health Economics

Health Services Research Unit, University of Aberdeen, Aberdeen AB25 2ZD, UK.

Marion K Campbell, Director & Professor of Health Services Research

**Correspondence to:** [p.m.hoddinott@stir.ac.uk](mailto:p.m.hoddinott@stir.ac.uk)

**Copyright:** The Corresponding Author has the right to grant on behalf of all authors and does grant on behalf of all authors, ***a worldwide licence*** to the Publishers and its licensees in perpetuity, in all forms, formats and media (whether known now or created in the future), to i) publish, reproduce, distribute, display and store the Contribution, ii) translate the Contribution into other languages, create adaptations, reprints, include within collections and create summaries, extracts and/or, abstracts of the Contribution, iii) create any other derivative work(s) based on the Contribution, iv) to exploit all subsidiary rights in the Contribution, v) the inclusion of electronic links from the Contribution to third party material where-ever it may be located; and, vi) licence any third party to do any or all of the above."

## Abstract

### Objective

To survey public attitudes about incentives for smoking cessation in pregnancy and for breastfeeding to inform trial design

### Design

Cross sectional survey

### Setting and participants

British general public

### Methods

Seven promising incentive strategies had been identified from evidence syntheses and qualitative interview data from service users and providers. These were shopping vouchers for: (i) validated smoking cessation in pregnancy and (ii) after birth; (iii) for a smoke-free home; (iv) for proven breastfeeding; (v) a free breast pump; (vi) payments to health services for reaching smoking cessation in pregnancy targets and (vii) breastfeeding targets. Ipsos MORI used area quota sampling and home-administered computer-assisted questionnaires, with randomised question order to assess agreement with different incentives (measured on a 5-point scale). Demographic data and target behaviour experience were recorded. Analysis used multivariable ordered logit models.

### Results

Agreement with incentives was mixed (ranging from 34-46%) among a representative sample of 1144 British adults. Mean agreement score was highest for a free breast pump; and lowest for incentives for smoking abstinence after birth. More women disagreed with shopping vouchers than men. Those with lower levels of education disagreed more with smoking cessation incentives and a breast pump. Those aged 44 or under agreed more with all incentive strategies compared to those aged 65 and over, particularly provider targets for smoking cessation. Non-white ethnic groups agreed particularly with breastfeeding incentives. Current smokers with previous stop attempts and respondents who had breastfed children agreed with providing vouchers for the respective behaviours. Up to £40 per month vouchers for behaviour change were acceptable (>85%).

### Conclusion

Women and the less educated were more likely to disagree, but men and women of child-bearing age to agree, with incentives designed for their benefit. Trials evaluating reach, impact on health inequalities and ethnic groups are required prior to implementing incentive interventions.

**Prospero Registration:** CRD42012001980 for the systematic reviews informing the survey design.

## Article summary

### Strengths and limitations of this study

This large cross sectional survey of attitudes to incentives for smoking cessation around pregnancy and for breastfeeding was conducted by an internationally recognised independent company using rigorous methods to achieve a representative sample of the British general public.

Our multi-disciplinary mixed methods approach to survey design and to investigating two behaviours concurrently, used an innovative participatory approach to incorporate service user perspectives.

Original findings show that women and those with fewer educational qualifications are more likely to disagree with incentives, raising concerns about the implications for health inequalities, as these are intended target populations for behaviour change.

Important limitations relate to the unknown generalisability to other countries; non-responder and selection biases; potential confounding between smoking cessation and breastfeeding and other unknown confounders.

Although we randomised the order of smoking and breastfeeding questions, further framing effects are possible particularly for the introductory statements.

## Introduction

Government interventions to change lifestyle behaviours are increasingly incorporating incentives to encourage healthy choices<sup>1</sup>, but directly paying people is seen to be the least acceptable approach<sup>2</sup>, with minimally intrusive interventions deemed more acceptable.<sup>1</sup> Experimental studies investigating incentives for smoking cessation in a general population show that incentive acceptability increases with effectiveness.<sup>3</sup> Media coverage of incentive interventions tends to focus on a range of concerns including perceived unfairness to those who already make healthy choices; appearing to reward unhealthy behaviours; potential for abuse; opportunity costs; the need to monitor and safeguard; and “Big Brother” or “nanny state” authoritarianism. However, incentives can demonstrate to people that they are worthy of being helped and can facilitate connections between recipients and care providers.<sup>4</sup> Incentives addressing outcomes for children appear more acceptable than outcomes for adults.<sup>1,5</sup>

In the UK there are marked inequalities in health between social groups. Incentives are one strategy that could be used to redistribute resources through targeting or proportionate universalism,<sup>6</sup> as lifestyle behaviours that compromise health around childbirth are socially patterned<sup>7</sup> and cluster in more disadvantaged communities.<sup>8</sup> For example, pregnant mothers aged 20 or under are: more than five times less likely to be breastfeeding at four months; three times more likely to smoke before or during pregnancy and are less likely to stop smoking compared to mothers aged 35 or over.<sup>7</sup> In 2010 in the UK, the breastfeeding initiation rate was 90% for mothers in managerial and professional occupations, compared with 74% of mothers in routine and manual occupations, with a difference in smoking before or during pregnancy of 14% and 40% respectively.<sup>7</sup> In 2010, 32% of pregnant women lived in a household where at least one other person smoked during pregnancy.<sup>7</sup>

There is promising evidence supporting financial incentives for smoking cessation in pregnancy:<sup>9-11</sup> interventions that include incentives are more effective than pharmacotherapy and/or psycho-social interventions alone.<sup>9</sup> However, the level of the incentive and the nature of accompanying behaviour change techniques provided alongside incentives, are likely to be confounders.<sup>9,11</sup> Reported trials to date have small samples.<sup>9-11</sup> In addition, important concerns about limited reach, particularly to the more marginalised in society, have been raised.<sup>12,13</sup> There are fewer incentive trials of interventions to initiate or maintain breastfeeding<sup>14</sup> and generalisability of support interventions to predominantly formula feeding cultures like the UK is uncertain.<sup>15</sup>

1  
2  
3 This survey aimed to investigate the public acceptability of a shortlist of promising incentive  
4 strategies for stopping smoking in pregnancy or for breastfeeding. This is particularly  
5 important in countries where health care is state funded. The ultimate study aim was to  
6 inform the design of incentive intervention trials for smoking in pregnancy and for  
7 breastfeeding and to improve understanding of the mechanisms of action of incentives. As  
8 this is a relatively new field of research, a broad definition of incentive was applied (Box 1).  
9  
10  
11

## 12 13 **Methods**

### 14 ***Survey design***

15  
16 A shortlist of seven promising incentive strategies (Box 2) had been developed prior to the  
17 survey administration, informed by evidence syntheses, input from mother and baby group  
18 members who were partners in the research and qualitative research with a range of  
19 stakeholders.<sup>16</sup> A wide range of incentives were considered to inform the shortlist, including  
20 food vouchers, baby related items, such as diapers, gifts, beauty treatments for the mother  
21 and incentives aimed at the partner e.g football tickets. Incentives provided for preparatory  
22 behaviours, for example, attending a support group or one-to-one session, and  
23 unpredictable incentives like raffles, were also considered. A justification for our selected  
24 shortlist is described in detail elsewhere.<sup>16</sup> In the survey (Web 1, p1-4), acceptability of the  
25 shortlisted interventions was measured on a 5-point Likert style scale from strongly agree to  
26 strongly disagree. The subgroup responding strongly agree, agree or neither agree nor  
27 disagree to voucher incentives were asked whether incentives should be universally  
28 provided or to low income women only and to choose an acceptable value (£2, £10, £20,  
29 £40, £60, £80) for shopping vouchers provided monthly to women who prove that they have  
30 stopped smoking or are breastfeeding. The values were selected to represent the range  
31 identified in the evidence syntheses. Careful consideration was given to framing effects, as  
32 greater acceptability is reported for a *reward* rather than *payment*<sup>17</sup> and with increased  
33 effectiveness.<sup>3</sup>  
34  
35  
36  
37  
38  
39  
40  
41  
42  
43  
44  
45

### 46 ***Data collection***

47 Ipsos MORI used a controlled form of random location sampling to identify 161 geographical  
48 sites (Web 2, p5-6) using a method of quota sampling which has been independently  
49 evaluated<sup>18</sup>. Trained field researchers were asked to interview five people at home from 250  
50 addresses at each site, to obtain a nationally and regionally representative sample of adults  
51 aged 18 or over between 22 March 2013 – 15 April 2013. Interlocking quotas were set for  
52 age, sex, working status, and tenure based on the known profile of Great Britain (from ONS  
53 2011 estimates for England and Wales and from General Register Office for Scotland 2011  
54 mid-year estimates, and from National Readership Survey data. National Readership Survey  
55  
56  
57  
58  
59  
60

1  
2  
3 profiles are commonly used for this purpose they provide a basis for interlocking quotas e.g.  
4 sex within working status. Interviewers used Computer Assisted Personal Interviewing  
5 (CAPI) with randomisation of the order for smoking and breastfeeding incentive questions  
6 generated independently and automated using CAPI software, to investigate question order  
7 framing effects. Incentive questions were asked after the demographic questions, but before  
8 the parent, smoking and breastfeeding status questions.  
9  
10  
11

### 12 13 **Statistical analysis**

14 An *a priori* target sample size of 1000 was set to allow us to estimate proportions to within  
15 3% margin of error with 95% level of confidence. A priori questions asked:  
16  
17

- 18 1. Is the acceptability of the seven shortlisted incentive strategies influenced according  
19 to age (categories 18-24, 25-34, 35-44, 45-54, 55-59, 60-64, 65 and over); sex;  
20 social grade (A and B, C1, C2, D, E); region (North, North West, Yorkshire and  
21 Humberside, East Midlands, West Midlands, East Anglia, South East, South West,  
22 London, Wales, Scotland); ethnicity (White British, Other Ethnicity); education  
23 (University, GCSE or equivalent, A-level or equivalent, no formal qualifications, still  
24 studying or other qualifications, or don't know); having children (yes, no); personal  
25 experience of smoking (never smoked, ex-smoker, current smoker - failed to stop, or  
26 no attempts to stop); had a child ever been breastfed (even if for only a day or two)?  
27  
28 2. What are the independent predictors of acceptability of the shortlist of incentive  
29 strategies?  
30  
31 3. What value of incentive is most acceptable and what are the independent predictors  
32 of the preferred incentive value?  
33  
34 4. Are universal incentives preferred to incentives targeted at low income women and  
35 what are the independent predictors for preference?  
36  
37  
38  
39  
40

41 Data were described using the appropriate summary statistics where relevant. Responses to  
42 the Likert style outcome survey items were summarised by number, percentage and mean,  
43 and graphed using bar charts. Responses to these outcome items were tabulated, broken  
44 down by the independent predictor variables specified above. Net agreement (agree and  
45 strongly agree) and net disagreement (disagree and strongly disagree) were also reported  
46 as number and percentage. Simple and multiple ordered logit regression models were used  
47 to determine the independent predictors of acceptability for the shortlist. The relationship  
48 between predictor and outcomes variables was summarised using the odds ratio and 95%  
49 confidence intervals. For the financial value and targeting of incentives to low income women  
50 only (research questions 3 and 4) two part models were used. For research question 3, the  
51 value of incentives, a probit model was used to estimate a 'positive' response (i.e. strongly  
52 agree, agree, or neither agree nor disagree) and then linear regression was used to model  
53  
54  
55  
56  
57  
58  
59  
60



1  
2  
3 the amount of shopping voucher acceptable conditional on a positive response. For research  
4 question 4, targeting low income women only, a similar model was used but as the  
5 conditional response here was dichotomous a probit model was used instead of linear  
6 regression. In all models the most affluent status was used as the reference category where  
7 appropriate (i.e. male; white ethnicity; university qualification; Social grade A or B; resident in  
8 London; no children; never smoked; child breastfed). Age was entered as 5-year categories.  
9 All analyses were done in Stata 13 (StataCorp. 2013. Stata Statistical Software: Release 13.  
10 College Station, TX: StataCorp LP).  
11  
12  
13  
14

### 15 16 17 ***Role of the funding source***

18 The funders had no role in the data collection, analysis, interpretation, the writing of the  
19 manuscript or the decision to submit.  
20  
21

### 22 23 **Findings**

24 The characteristics of the 1144 representatives of the British public who participated in the  
25 CAPIBUS survey and any variables with missing data are detailed in Table 1. Detailed tables  
26 reporting weighted with un-weighted data are available (Web 3).  
27  
28  
29

### 30 31 ***Overall acceptability of incentives***

32 The acceptability of the seven promising incentive strategies was mixed (Figure 1 and Table  
33 2). Between 34-46% agreed with these incentives. Overall, the most acceptable incentive,  
34 with net agreement of 46% and net disagreement of 28%, was to provide a breast pump  
35 worth £40 to help women continue breastfeeding. The least acceptable incentives were  
36 shopping vouchers given to women who continue to stop smoking after birth (net agreement  
37 37% and net disagreement 47%) or given to women to maintain a smoke-free home (net  
38 agreement 34% and net disagreement 46%). The general public expressed collective  
39 uncertainty about providing funding to local health service providers to meet smoking  
40 cessation in pregnancy or breastfeeding targets: just over a third of the respondents agreed  
41 and a third disagreed. Framing effects with question randomisation were observed (Web 4,  
42 p7-8). Significantly higher agreement with all breastfeeding incentive strategies was  
43 observed when breastfeeding questions were asked before the smoking questions: vouchers  
44 for breastfeeding OR 2.00 (95% CI 1.61, 2.46; p< 0.001); a free breast pump OR 1.32 (95%  
45 CI, 1.08, 1.62; p<0.008); and provider incentives for breastfeeding targets OR 1.44 (95% CI,  
46 1.17, 1.77; p<0.001). Differences in agreement for all smoking cessation incentive strategies  
47 were non-significant when the smoking questions were asked before the breastfeeding  
48 questions.  
49  
50  
51  
52  
53  
54  
55  
56  
57  
58  
59  
60

### ***Independent predictors of agreement with incentives***

Table 3 describes the independent predictors of agreement with incentives. For aid of interpretation and comparison, we have summarised the odds ratios (ORs) into groups (OR <0.5, >=0.5 to <1.0, >=1.0 to <1.5, >=1.5 to <2.0, and >=2.0). Full results tables are available (Web 5, p9-44). Being of childbearing age (44 and under) was an independent predictor of agreement with all seven incentive strategies, with agreement generally decreasing with increased age. Agreement amongst the 44 and under age group compared to the 65 and over age group was strongest for provider targets for smoking cessation in pregnancy (OR>=2.0).

Women who are (or would have been when younger) the intended recipients of the vouchers, were less likely to agree with any shopping vouchers for: smoking cessation during pregnancy OR 0.71 (95% CI 0.57, 0.88; p = 0.002), after birth OR 0.68 (95% CI 0.55, 0.85; p=0.001), smoke-free homes OR 0.72 (95% CI 0.58, 0.90; p=0.003) or breastfeeding OR 0.77 (95% CI 0.62, 0.95; p = 0.016) when compared to men.

Respondents with lower educational level, when compared to those with degree level qualifications, were more likely to disagree ( $0.5 \leq \text{OR} < 1.0$ ) with shopping voucher incentives given to women for smoking cessation before or after birth, a free breast pump, or for additional funding to local health services for meeting smoking cessation targets. There was no evidence of difference across education groups for vouchers for breastfeeding or additional payments to local health services for meeting breastfeeding targets.

The associations with lower social grade when compared to social grade A and B combined were less clear. Social grade E predicted agreement with shopping vouchers for smoking cessation in pregnancy (OR 1.74; 95% CI 1.12, 2.70; p = 0.014) and a free breast pump (OR 1.57; 95% CI 1.00, 2.46; p = 0.05); social grade C2 predicted agreement with vouchers for continued smoking cessation after birth (OR 1.64; 95% CI 1.18, 2.27 p = 0.003); but in contrast social grade C1 predicted disagreement with additional funding to local health services for meeting smoking cessation targets (OR 0.68; 95% CI 0.50, 0.94 p = 0.019).

Being from a non-white British ethnic group, when compared to being white British, was a strong predictor of agreeing with breastfeeding vouchers (OR 2.03; 95% CI 1.43, 2.88; p< 0.001) and with additional funding to local health services for meeting breastfeeding targets (OR 2.31; 95% CI 1.63, 3.29; p< 0.001) but not for a free breast pump. Being from a non-white British group also predicted agreement with vouchers for stopping smoking in

1  
2  
3 pregnancy (OR 1.42; 95% CI 1.01, 1.99;  $p = 0.047$ ) and a smoke-free home (OR 1.49; 95%  
4 CI 1.06, 2.08;  $p = 0.021$ ).  
5  
6

7  
8 Current smokers who had tried stopping in the past were more likely to agree with vouchers  
9 for stopping smoking in pregnancy (OR 1.63; 95% CI 1.18, 2.26;  $p = 0.003$ ) and for  
10 maintaining a smoke-free home after birth (OR 1.48; 95% CI 1.08, 2.04;  $p = 0.016$ ), but not  
11 for continued smoking cessation after birth, or provider incentives to meet smoking cessation  
12 targets. Those with a breastfed child were more likely to agree with vouchers for  
13 breastfeeding OR 1.67 (95% CI 1.24, 2.25;  $p = 0.001$ ) and with a free breast pump OR 1.84  
14 (95% CI 1.36, 2.49;  $p = <0.001$ ), but not with provider incentives for meeting breastfeeding  
15 targets, when compared to those with children that had not been breastfed.  
16  
17  
18  
19

20  
21 Where respondents did not disagree (i.e. answered strongly agree, agree or neither agree  
22 nor disagree) with providing shopping vouchers as an incentive, up to £40 per month  
23 vouchers for behaviour change were acceptable (>85%) (Table 4). This was consistent for  
24 both smoking cessation and breastfeeding. For smoking cessation in pregnancy, being a  
25 current smoker who has tried to stop (compared to never smoked), or having a child  
26 previously breastfed (compared to no breastfed children) was correlated with a higher value  
27 of shopping voucher (Web 5, Table 15). For breastfeeding, having a child previously  
28 breastfed (compared to no breastfed children) was correlated with an increased value of  
29 shopping voucher (Web 5, Table 17).  
30  
31  
32  
33  
34  
35

36  
37 Universal provision rather than targeting low income women was preferred by 364 (55%) of  
38 the 660 who did not disagree with vouchers for smoking cessation in pregnancy, compared  
39 with 296 (44.9%) who thought that vouchers should be targeted at low income women only.  
40 Agreement with universal provision of vouchers for breastfeeding was similar: 367 (52.3%)  
41 compared to 330 (47.4%) thought that incentives should be provided to low income women  
42 only. Disagreement with vouchers being given to low income women only was associated  
43 with being a woman (Web 5, Tables 16 and 18) but this was only significant for  
44 breastfeeding.  
45  
46  
47  
48

## 49 Discussion

50  
51 In this representative British sample, public opinion regarding the acceptability of incentives  
52 for smoking cessation in pregnancy and breastfeeding was mixed. Men and women of child-  
53 bearing age (44 or under), and therefore a representative of the target population for this  
54 behaviour change strategy, was the only independent predictor of agreement with all seven  
55 incentive strategies. Of concern, women were significantly more likely to disagree with any of  
56  
57  
58  
59  
60

1  
2  
3 the shopping voucher incentive strategies compared to men. General public respondents  
4 with lower educational level were more likely to disagree with any voucher incentives to  
5 women for smoking cessation, or with a free breast pump. Agreement appears to be  
6 strongest in non-white ethnic groups. As reported by others,<sup>1</sup> people with direct experiences  
7 of attempting the target behaviours were more likely to agree with incentives.  
8  
9

10  
11  
12 This is the largest survey of public attitudes to incentive provision aiming to change lifestyle  
13 behaviours and was conducted by an independent company with an international reputation  
14 for conducting surveys of this type. Methodological research indicates that high quality, well  
15 controlled quota sampling in survey design has a negligible impact on the bias and precision  
16 of estimates compared to that in a simple random sample.<sup>18</sup> Our multi-disciplinary mixed  
17 methods approach to survey design and investigating two behaviours concurrently, with an  
18 innovative participatory approach to incorporating service user perspectives through co-  
19 applicant mother and baby groups located in disadvantaged areas, are novel.<sup>16,19</sup> Important  
20 limitations relate to the unknown generalisability to other countries; non-responder and  
21 selection biases; and other potential confounders. This research was commissioned to  
22 investigate two behaviours concurrently, and this may be considered as either a strength or  
23 a limitation. There is a tradition of researching lifestyle behaviours separately, but from an  
24 individual and a social network perspective they are often complexly inter-related.<sup>7,16</sup> In  
25 addition, smoking cessation and breastfeeding are associated and may confound each  
26 other, as women who stop smoking are more likely to breastfeed than those who continue to  
27 smoke.<sup>20,21</sup> The framing effects observed by randomising question order are important and  
28 further unknown framing effects could be present. In particular the introduction contained a  
29 stronger statement about the evidence for incentives changing smoking behaviour than for  
30 breastfeeding, as is consistent with current evidence<sup>9-11,14</sup> and evidence of effectiveness has  
31 been shown to impact on acceptability.<sup>3</sup> We propose that more research should investigate  
32 health related behaviours concurrently to understand their complex inter-relationships.  
33  
34  
35  
36  
37  
38  
39  
40  
41  
42  
43  
44

45  
46 The implications of our findings for efforts to reduce health inequalities are important. The  
47 disagreement with incentive strategies amongst those with lower educational level, which is  
48 considered the strongest predictor of disadvantage,<sup>6</sup> is unexpected and a concern as  
49 addressing health inequalities is a government priority. Smoking in pregnancy and not  
50 breastfeeding are highest amongst the less educated, the younger aged and white British  
51 women.<sup>7</sup> This data adds to reports of poor reach of incentive interventions, particularly to the  
52 most marginalised individuals.<sup>12,13</sup> Universal incentives were preferred to incentives targeted  
53 at low income women, with concerns about unintended consequences such as stigma and  
54 value judgments raised in linked qualitative data.<sup>16</sup> Differential uptake across educational  
55  
56  
57  
58  
59  
60

1  
2  
3 groups and the potential for health inequalities to increase is a concern, as noted for lifestyle  
4 behaviour change interventions.<sup>22</sup> Any assumption that incentives might redistribute  
5 resources and/or help to reduce health inequalities requires further testing.  
6  
7

8  
9 Women's disagreement with incentive strategies is particularly problematic due to the onus  
10 currently placed on women by health services and governments to change their health  
11 related behaviours. Similar disagreement with paying women to stop smoking in pregnancy  
12 was reported for a convenience sample of pregnant women attending an Australian  
13 antenatal clinic.<sup>23</sup> Some understanding of women's disagreement with shopping voucher  
14 incentives for individual or household behaviour change, which may seem counter-intuitive,  
15 is revealed in narratives of blame, pressure and stigma.<sup>16, 24-25</sup> In addition, psychological  
16 theory suggests that providing extrinsic motivation through financial incentives alone might  
17 be insufficient and meet with resistance, with intrinsic motivation required for more sustained  
18 behaviour change.<sup>26,27</sup> Qualitative data from this study highlights that the real life barriers  
19 and facilitators to living healthy lives need to be addressed concurrently with incentive  
20 interventions to optimise the likelihood of effectiveness.<sup>16</sup> For example, current smokers who  
21 reported failed attempts to stop were more likely to agree with shopping voucher incentives  
22 for a smoke-free home, but disagree with providing vouchers if the mother continues to  
23 abstain from smoking after birth. This fits with the evidence on relapse being associated with  
24 whether the partner and/or social network of a pregnant woman smokes.<sup>28</sup> Similarly, linked  
25 qualitative data suggest that a free breast pump is perceived to address more intrinsic and  
26 extrinsic barriers to continued breastfeeding than shopping vouchers, such as overcoming  
27 embarrassment with performing in public; resuming social lives; sharing the feeding-bonding  
28 experience with partners and relieving the mother as the sole supplier on demand.<sup>16</sup>  
29 However, breast pumps are an uncertain proxy outcome as the relationship between  
30 characteristics, use and feeding outcomes are uncertain.<sup>29</sup>  
31  
32  
33  
34  
35  
36  
37  
38  
39  
40  
41  
42  
43

44 Robust randomised controlled trials reporting reach, impact on health inequalities, ethnic  
45 groups, experience outcomes and any unintended consequences, in addition to the target  
46 behaviours, are required prior to any implementation or introduction of policy decisions  
47 around incentive interventions for smoking cessation in pregnancy, or breastfeeding.  
48  
49  
50

#### 51 **Acknowledgements:**

52 We would like to thank our co-applicants and research team: Mastrick Café Crèche,  
53 Aberdeen and St Cuthbert's and Palatine Children's Centre, Blackpool. Shelley Farrar and  
54 Nicola Crossland contributed to the survey design. Grant co-applicants Professor Fiona  
55 Dykes, Professor David Tappin and Dr Falko Sniehotta for their collaboration and input to  
56  
57  
58  
59  
60

1  
2  
3 the overall BIBS study design. We would like to thank the members of the public, the  
4 women, families and staff from health services, local government, voluntary sector and other  
5 organisations, who generously provided their time by participating in the BIBS study. Other  
6 members of the BIBS study team, in particular, Fiona Stewart and Cynthia Fraser for  
7 providing guidance with literature searching and reference management; Lara Kemp for  
8 providing secretarial support.  
9  
10  
11

12  
13  
14 **Prospero Registration:** CRD42012001980 for the systematic reviews informing the survey  
15 design.  
16  
17  
18  
19  
20  
21  
22  
23  
24  
25  
26  
27  
28  
29  
30  
31  
32  
33  
34  
35  
36  
37  
38  
39  
40  
41  
42  
43  
44  
45  
46  
47  
48  
49  
50  
51  
52  
53  
54  
55  
56  
57  
58  
59  
60

### Conflicts of interest

All authors have completed the Unified Competing Interest form at [www.icmje.org/coi\\_disclosure.pdf](http://www.icmje.org/coi_disclosure.pdf) (available on request from the corresponding author) and declare that (1) no authors have support from any company for the submitted work; (2) no authors have relationships with companies that might have an interest in the submitted work in the previous 3 years; (3) their spouses, partners, or children have no financial relationships that may be relevant to the submitted work; and (4) LB has non-financial interests that may be relevant to the submitted work. Ipsos Mori were commissioned to work with the research team by the University of Aberdeen.

### Contributions

Pat Hoddinott wrote the first draft of this paper and led the BIBS study. All co-authors have contributed to the design, analysis and paper writing and meet the ICMJE criteria for authorship. Heather Morgan co-ordinated service user co-applicant mother and baby group involvement in Aberdeen; contributed to the survey design, piloting, analysis decisions and wrote the first draft of the results. Graeme MacLennan led the statistical analysis of the survey data and contributed to writing the methods and results sections. Gill Thomson co-ordinated service user co-applicant mother and baby group involvement in Blackpool and contributed to the survey design, piloting and reporting of the results. Linda Bauld contributed to the survey design and reporting of the results. Kate Sewel, Lorraine Murray and their colleagues at Ipsos MORI, contributed to the survey design, collected the survey data, and provided the data as an SPSS file for further analysis. Anne Ludbrook contributed to the survey design and, with Deokhee Yi, analysed the incentive value and targeting questions in the survey and reported these sections of the results. Marion Campbell provided methodological and statistical input to the survey design, analysis and reporting of results.

### Ethics approvals

Full ethical approval for this study, including service user involvement, was obtained from the North of Scotland Research Ethics Committee (NOSRES, reference number: 12/NS/0041, 12<sup>th</sup> April 2012) and the BUSH (Built & Natural Environment, Sport and Health) Ethics Committee, University of Central Lancashire (BUSH064, 8<sup>th</sup> May 2012).

### Sources of funding

This project was commissioned by the NIHR Health Technology Assessment Programme (10/31/02) and will be published in full in *Health Technology Assessment*. Further information including the protocol is available at:



1  
2  
3 <http://www.nets.nihr.ac.uk/projects/hta/103102>. This report presents independent research  
4 commissioned by the National Institute for Health Research (NIHR). The views and opinions  
5 expressed by authors in this publication are those of the authors and do not necessarily  
6 reflect those of the NHS, the NIHR, MRC, CCF, NETSCC, the HTA programme or the  
7 Department of Health  
8  
9

10 The Nursing, Midwifery and Allied Health Professions Research Unit, University of Stirling,  
11 the Health Services Research Unit, and Health Economics Research Unit, Institute of  
12 Applied Health Sciences, University of Aberdeen are all core-funded by the Chief Scientist  
13 Office of the Scottish Government Health and Social Care Directorates.  
14  
15  
16

### 17 18 **Transparency statement**

19 All authors are independent of the funding bodies, had full access to all of the data reported  
20 in this paper and take responsibility for the integrity of the data and the accuracy of the data  
21 analysis. PH took the decision to submit for publication and is the guarantor. She affirms that  
22 the manuscript is an honest, accurate, and transparent account of the study being reported;  
23 and that no important aspects of the study have been omitted.  
24  
25  
26  
27

### 28 29 **Data sharing**

30 The full dataset is available from the corresponding author: p.m.hoddinott@stir.ac.uk.  
31  
32  
33  
34  
35  
36  
37  
38  
39  
40  
41  
42  
43  
44  
45  
46  
47  
48  
49  
50  
51  
52  
53  
54  
55  
56  
57  
58  
59  
60



## References

1. Diepeveen S, Ling T, Suhrcke M, et al. Public acceptability of government intervention to change health-related behaviours: A systematic review and narrative synthesis. *BMC Public Health*. 2013;13(1):756.
2. Park JD, Mitra N, Asch DA. Public opinion about financial incentives for smoking cessation. *Prev Med*. 2012;55, Supplement:S41-S45.
3. Promberger M, Dolan P, Marteau T. "Pay them if it works": Discrete choice experiments on the acceptability of financial incentives to change health related behaviour. *Soc Sci Med*. 2012;75(12):2509-2514.
4. Thomson G, Dykes F, Hurley M, et al. Incentives as connectors: Insights into a breastfeeding incentive intervention in a disadvantaged area of North-West England. *BMC Pregnancy and Childbirth*. 2012;12(1):22.
5. Jeffery RW. Financial incentives and weight control. *Prev Med*. 2012;55, Supplement:S61-S67.
6. Marmot M. *Fair society, healthy lives: The Marmot review. Strategic review of health inequalities in England post 2010*. [accessed March 2014]. Available from URL: <http://www.marmotreview.org/>.
7. McAndrew F, Thompson J, Fellows L, et al. *Infant feeding survey 2010*. [accessed March 2014]. Available from URL: <http://www.hscic.gov.uk/catalogue/PUB08694/ifs-uk-2010-sum.pdf>
8. Buck D, Frosini F. *Clustering of unhealthy behaviours over time: Implications for policy and practice*. London: The Kings Fund; 2012..
9. Chamberlain C, O'Mara-Eves A, Oliver S, et al. Psychosocial interventions for supporting women to stop smoking in pregnancy. *Cochrane Database of Syst Rev*, 2013;Issue10:CD001055.
10. Higgins ST, Washio Y, Heil SH, et al. Financial incentives for smoking cessation among pregnant and newly postpartum women. *Prev Med*. 2012;55, Supplement(0):S33-S40.
11. Hoddinott P, Hislop J, Morgan H, et al. Incentive interventions for smoking cessation in pregnancy: A mixed methods evidence synthesis. *The Lancet*. 2012;380, Supplement 3(0):S48.
12. Radley A, Ballard P, Eadie D, et al. Give it up for baby: Outcomes and factors influencing uptake of a pilot smoking cessation incentive scheme for pregnant women. *BMC Public Health*. 2013;13(1):343.

- 1  
2  
3 13. Schmidt H, Voigt K, Wikler D. Carrots, sticks, and health care reform — problems with  
4 wellness incentives. *N Engl J Med.* 2010;362(2):e3.  
5  
6 14. Renfrew MJ, McCormick FM, Wade A, et al. Support for healthy breastfeeding mothers  
7 with healthy term babies. *Cochrane Database of Syst Rev.* 2012;Issue 5:CD001141  
8  
9 15. Hoddinott P, Seyara R, Marais D. Global evidence synthesis and UK idiosyncrasy: Why  
10 have recent UK trials had no significant effects on breastfeeding rates? *Maternal & Child*  
11 *Nutrition.* 2011;7:221-227.  
12  
13 16. Morgan H, Hoddinott P, Thomson G, et al. Benefits of incentives for breastfeeding and  
14 smoking cessation in pregnancy (BIBS): a mixed methods study to inform trial design. [in  
15 press]. *Health Technology Assessment* 2014.  
16 [accessed March 2014]. Available from URL <http://www.nets.nihr.ac.uk/projects/hta/103102>.  
17  
18 17. Eunson J, Murray L. *The acceptability of carrots.* Edinburgh: Ipsos MORI Scotland; 2012  
19 [accessed March 2014]. Available from URL: [http://www.ipsos-](http://www.ipsos-mori.com/newsevents/ca/1233/The-acceptability-of-carrots.aspx)  
20 [mori.com/newsevents/ca/1233/The-acceptability-of-carrots.aspx](http://www.ipsos-mori.com/newsevents/ca/1233/The-acceptability-of-carrots.aspx).  
21  
22 18. Raab, G. (2009). Technical Annex to Davidson S., Martin C., Treanor S. Scottish  
23 Environmental Attitudes and Behaviours Survey 2008: Technical Report. Scottish  
24 Executive. [Accessed June 2014]. Available from URL:  
25 <http://www.scotland.gov.uk/Resource/Doc/265441/0079493.pdf>  
26  
27 19. Morgan H, Hoddinott P, Thomson G, et al. Service user groups as co-applicants on a  
28 platform study for a trial. *Trials:* 2013, 14(Suppl 1):O35.  
29  
30 20. Higgins TM, Higgins ST, Heil SH, et al. Effects of cigarette smoking cessation on  
31 breastfeeding duration. *Nicotine Tobacco Res* 2010;12:483-8.  
32  
33 21. Kendzor DE, Businelle MS, Costello TJ, et al. Breast feeding is associated with  
34 postpartum smoking abstinence among women who quit smoking due to pregnancy. *Nicotine*  
35 *Tobacco Res* 2010;12:983-8.  
36  
37 22. Jepson R, Harris F, Platt S, et al. The effectiveness of interventions to change six health  
38 behaviours: A review of reviews. *BMC Public Health.* 2010;10(1):538.  
39  
40 23. Lynagh M, Bonevski B, Symonds I, et al. Paying women to quit smoking during  
41 pregnancy? Acceptability among pregnant women. *Nicotine Tobacco Res* 2011;13:1029-36.  
42  
43 24. Ingall G, Cropley M. Exploring the barriers of quitting smoking during pregnancy: A  
44 systematic review of qualitative studies. *Women and Birth.* 2010;23(2):45-52.  
45  
46  
47  
48  
49  
50  
51  
52  
53  
54  
55  
56  
57  
58  
59  
60

- 1  
2  
3 25. Hoddinott P, Craig LCA, Britten J, et al. A serial qualitative interview study of infant  
4 feeding experiences: Idealism meets realism. *BMJ Open* 2012;2:e000504.  
5  
6 26. Frey B. *Not just for the money. An economic theory of personal motivation*. Brookfield  
7 VT: Edward Elgar Publishing; 1997.  
8  
9 27. Deci EL, Koestner R, Ryan RM. A meta-analytic review of experiments examining the  
10 effects of extrinsic rewards on intrinsic motivation. *Psychological bulletin*. 1999;125:627-668.  
11  
12 28. Graham H, Sowden A, Flemming K, et al. *Using qualitative research to inform*  
13 *interventions to reduce smoking in pregnancy in England: A systematic review of qualitative*  
14 *studies*. Public Health Research Consortium; 2012.  
15  
16 29. Becker GE, Cooney F, Smith HA. Methods of milk expression for lactating women.  
17 *Cochrane Database Syst Rev* 2011;Issue 12:CD006170.  
18  
19  
20  
21  
22  
23  
24  
25  
26  
27  
28  
29  
30  
31  
32  
33  
34  
35  
36  
37  
38  
39  
40  
41  
42  
43  
44  
45  
46  
47  
48  
49  
50  
51  
52  
53  
54  
55  
56  
57  
58  
59  
60

**Box 1 (to go in main paper). Definition of an incentive**

Incentives include financial (positive or negative) and non-financial tangible incentives or rewards. This includes free or reduced cost items that have a monetary value or an exchange value, like refreshments, baby products or services like child care or ironing. The definition excludes intangible incentives such as supportive, motivational or persuasive relationships with professionals or peers. Incentives may be delivered directly or indirectly at local, regional or national level by organisations.

**Box 2 (to go in main paper). Shortlist of seven promising incentive strategies**

1. Shopping vouchers for women who prove that they have stopped smoking during pregnancy
2. Shopping vouchers for a woman for two months after the birth of her baby if she proves that she is still not smoking
3. Shopping vouchers for a woman for two months after the birth of her baby if she never lets anyone smoke in her home
4. Shopping vouchers for women who prove that they are breastfeeding for the first 6 months after birth
5. A breast pump costing around £40 provided for free by the health service
6. Additional funding for local health services if they reach targets for the number of women who prove that they have stopped smoking during pregnancy
7. Additional funding for local health services if they reach targets for the number of women who prove that they are breastfeeding

**Table 1. Characteristics of the general public sample (n=1144)**

| Variable           | Categories                                | Sample (%) |
|--------------------|-------------------------------------------|------------|
| Sex                | Male                                      | 540 (47.2) |
|                    | Female                                    | 604 (52.7) |
| Age                | 18-24                                     | 170 (14.9) |
|                    | 25-34                                     | 175 (15.3) |
|                    | 35-44                                     | 181 (15.8) |
|                    | 45-54                                     | 159 (13.9) |
|                    | 55-59                                     | 72 (6.3)   |
|                    | 60-64                                     | 94 (8.2)   |
| Ethnicity          | 65<                                       | 293 (25.6) |
|                    | White                                     | 985 (86.1) |
|                    | BME                                       | 151 (13.2) |
|                    | Refused to answer                         | 8 (0.7)    |
|                    | <i>White British</i>                      | 914 (79.9) |
|                    | <i>White Irish</i>                        | 11 (1.0)   |
|                    | <i>White Gypsy/Traveller</i>              | -          |
|                    | <i>White Other</i>                        | 60 (5.2)   |
|                    | <i>Mixed W/B Caribbean</i>                | 3 (0.3)    |
|                    | <i>Mixed W/B African</i>                  | 1 (<0.1)   |
|                    | <i>Mixed White and Asian</i>              | 3 (0.3)    |
|                    | <i>Mixed Other</i>                        | 2 (0.2)    |
|                    | <i>Asian Indian</i>                       | 19 (1.7)   |
|                    | <i>Asian Pakistani</i>                    | 47 (4.1)   |
|                    | <i>Asian Bangladeshi</i>                  | 12 (1.1)   |
|                    | <i>Asian Chinese</i>                      | 7 (0.6)    |
| <i>Asian Other</i> | 13 (1.1)                                  |            |
| Smoking status     | <i>Black African</i>                      | 26 (2.3)   |
|                    | <i>Black Caribbean</i>                    | 7 (0.6)    |
|                    | <i>Black Other</i>                        | 2 (0.2)    |
|                    | <i>Arab</i>                               | 4 (0.4)    |
|                    | <i>Other</i>                              | 5 (0.4)    |
|                    | <i>Refused</i>                            | 8 (0.7)    |
|                    | Never smoked                              | 573 (50.1) |
|                    | Current smoker, tried to stop smoking     | 175 (15.3) |
| Any children       | Current smoker, not tried to stop smoking | 63 (5.5)   |
|                    | Ex-smoker                                 | 281 (24.6) |
| Breastfeeding      | Declined to answer                        | 52 (4.6)   |
|                    | Yes                                       | 742 (64.9) |
| Education          | No                                        | 402 (35.1) |
|                    | Any children breastfed                    | 512 (47.3) |
|                    | No children breastfed                     | 632 (52.5) |
| Social grade       | GCSE/O-level/CSE/NVQ                      | 342 (29.9) |
|                    | A-level or equivalent                     | 193 (16.9) |
|                    | Degree/Masters/PhD                        | 295 (25.9) |
|                    | No formal qualifications                  | 197 (17.2) |
| Survey region      | Other/Don't know/ Still studying          | 117 (10.2) |
|                    | A                                         | 36 (3.2)   |
|                    | B                                         | 203 (17.7) |
|                    | C1                                        | 370 (32.3) |
|                    | C2                                        | 236 (20.6) |
|                    | D                                         | 162 (14.2) |
| Survey region      | E                                         | 137 (12.0) |
|                    | North                                     | 77 (6.7)   |
|                    | North West                                | 142 (12.4) |
|                    | Yorks & Humberside                        | 104 (9.1)  |
|                    | West Midlands                             | 109 (6.5)  |
|                    | East Midlands                             | 66 (5.8)   |
|                    | East Anglia                               | 41 (3.6)   |
|                    | South West                                | 81 (7.1)   |
|                    | South East                                | 200 (17.5) |
|                    | Greater London                            | 149 (13)   |
| Wales              | 66 (5.8)                                  |            |
| Scotland           | 109 (9.3)                                 |            |

**Table 2. Summary of general public agreement with seven incentive strategies**

| Incentive strategy                                                                                                                                   | % Disagree | % Neither | % Agree | Mean |
|------------------------------------------------------------------------------------------------------------------------------------------------------|------------|-----------|---------|------|
| Shopping vouchers for women who prove that they have stopped smoking during pregnancy                                                                | 42.3       | 17.2      | 40.5    | 2.9  |
| Shopping vouchers for a woman for two months after the birth of her baby if she proves that she is still not smoking                                 | 46.4       | 17.3      | 36.5    | 2.7  |
| Shopping vouchers for a woman for two months after the birth of her baby if she never lets anyone smoke in her home                                  | 46.0       | 19.6      | 34.4    | 2.7  |
| Shopping vouchers for women who prove that they are breastfeeding for the first 6 months after birth                                                 | 39.1       | 26.8      | 34.2    | 2.9  |
| A breast pump costing around £40 provided for free on the NHS                                                                                        | 27.8       | 27.0      | 45.8    | 3.2  |
| Additional funding for local health services if they reach targets for the number of women who prove that they have stopped smoking during pregnancy | 37.2       | 23.3      | 39.4    | 2.9  |
| Additional funding for local health services if they reach targets for the number of women who prove that they are breastfeeding                     | 38.6       | 25.1      | 36.4    | 2.9  |

Table 3 alternative. Summary of the independent predictors of general public agreement with incentive strategies

|                                                                                                                                                                 | Age <=44 | Female | Lower education level | Social grade C or below | Non white ethnicity | Current smoker who have attempted to stop | Children breastfed |
|-----------------------------------------------------------------------------------------------------------------------------------------------------------------|----------|--------|-----------------------|-------------------------|---------------------|-------------------------------------------|--------------------|
| Shopping vouchers should be provided to women who prove that they have stopped smoking during pregnancy                                                         | ++       | -      | -                     | ++ (Grade E)            | +                   | ++                                        |                    |
| It is acceptable to provide shopping vouchers to a woman for two months after the birth of her baby if she proves that she is still not smoking                 | ++       | -      | -                     | ++ (Grade C2)           |                     |                                           |                    |
| It is acceptable to provide shopping vouchers to a woman for two months after the birth of her baby if she never lets anyone smoke in her home                  | ++       | -      | -                     |                         | +                   | +                                         |                    |
| Shopping vouchers should be provided to women who breastfeed for the first six months after the birth of their child                                            | ++       | -      |                       |                         | +++                 |                                           | ++                 |
| A breast pump costing around £40 should be available for free on the NHS, to help women to continue breastfeeding.                                              | ++       |        | -                     | ++ (Grade E)            |                     |                                           | ++                 |
| Local health services should receive additional funding if they reach targets for the number of women who prove that they have stopped smoking during pregnancy | +++      |        | -                     | - (Grade C1)            |                     |                                           |                    |
| Local health services should receive additional funding if they reach targets for the number of women who reach targets for the number of women who breastfeed  | ++       |        |                       |                         | +++                 |                                           |                    |

Odds Ratios (OR) for agreement: + represents  $1.0 \leq OR < 1.5$ ; ++ represents  $1.5 \leq OR < 2.0$ ; +++ represents  $OR \geq 2.0$ ; - represents  $0.5 \leq OR < 1.0$ .

**Table 4. Highest acceptable value of shopping voucher for women who stop smoking during pregnancy or are breastfeeding**

| Value | Smoking in pregnancy |         | Breastfeeding        |         |
|-------|----------------------|---------|----------------------|---------|
|       | Number<br>(N = 660*) | Percent | Number<br>(N = 697*) | Percent |
| £2    | 116                  | 17.6    | 146                  | 20.95   |
| £10   | 146                  | 22.1    | 150                  | 21.52   |
| £20   | 193                  | 29.2    | 199                  | 28.55   |
| £40   | 115                  | 17.4    | 110                  | 15.78   |
| £60   | 36                   | 5.5     | 36                   | 5.16    |
| £80   | 54                   | 8.2     | 56                   | 8.03    |

\* Respondents from the 1144 British public participants who strongly agreed, agreed or neither agreed nor disagreed with shopping vouchers incentives

**Figure 1. Bar charts of general public agreement with the shortlist of incentive strategies**

SD: Strongly disagree  
 D: Disagree  
 N: Neither agree nor disagree  
 A: Agree  
 SA: Strongly agree  
 BF: Breastfeeding  
 SS: Stop smoking



**Title: Public acceptability of financial incentives for smoking cessation in pregnancy and breastfeeding: a survey of the British public**

**Authors:** Pat Hoddinott, Heather Morgan, Graeme MacLennan, Kate Sewel, Gill Thomson, Linda Bauld, Deokhee Yi, Anne Ludbrook, Marion K Campbell.

Nursing, Midwifery and Allied Health Professions Research Unit, University of Stirling, Stirling FK9 4LA, UK.

Pat Hoddinott, Chair in Primary Care

Health Services Research Unit, University of Aberdeen, Aberdeen AB25 2ZD, UK.

Heather Morgan, Research Fellow in Social Science

Health Services Research Unit, University of Aberdeen, Aberdeen AB25 2ZD, UK.

Graeme MacLennan, Senior Research Fellow in Statistics

Ipsos MORI Scotland, Edinburgh, EH3 6DH, UK.

Kate Sewel, Senior Researcher

Maternal and Infant Nutrition and Nurture Unit, University of Central Lancashire, Preston PR1 2HE, UK

Gill Thomson, Senior Research Fellow in Social Science

Health Policy and Social Marketing, University of Stirling, Stirling FK9 4LA, UK

Linda Bauld, Professor of Health Policy

Health Economics Research Unit, University of Aberdeen, Aberdeen AB25 2ZD, UK

Deokhee Yi, Research Fellow in Health Economics

Health Economics Research Unit, University of Aberdeen, Aberdeen AB25 2ZD, UK

Anne Ludbrook, Professor of Health Economics

Health Services Research Unit, University of Aberdeen, Aberdeen AB25 2ZD, UK.

Marion K Campbell, Director & Professor of Health Services Research

**Correspondence to:** [p.m.hoddinott@stir.ac.uk](mailto:p.m.hoddinott@stir.ac.uk)

**Copyright:** The Corresponding Author has the right to grant on behalf of all authors and does grant on behalf of all authors, **a worldwide licence** to the Publishers and its licensees in perpetuity, in all forms, formats and media (whether known now or created in the future), to i) publish, reproduce, distribute, display and store the Contribution, ii) translate the Contribution into other languages, create adaptations, reprints, include within collections and create summaries, extracts and/or, abstracts of the Contribution, iii) create any other derivative work(s) based on the Contribution, iv) to exploit all subsidiary rights in the Contribution, v) the inclusion of electronic links from the Contribution to third party material where-ever it may be located; and, vi) licence any third party to do any or all of the above."

## Abstract

### Objective

To survey public attitudes about incentives for smoking cessation in pregnancy and [for](#) breastfeeding to inform trial design

### Design

Cross sectional survey

### Setting and participants

[UK-British](#) general public

### Methods

Seven promising incentive strategies had been identified from evidence syntheses and qualitative interview data from service users and providers. These were shopping vouchers for: (i) validated smoking cessation in pregnancy and (ii) after birth; (iii) for a smoke-free home; (iv) for proven breastfeeding; (v) a free breast pump; (vi) payments to health services for reaching smoking cessation in pregnancy targets and (vii) breastfeeding targets. Ipsos MORI used area quota sampling and home-administered computer-assisted questionnaires, with randomised question order to assess agreement with different incentives (measured on a 5-point scale). Demographic data and target behaviour experience were recorded. Analysis used multivariable ordered logit models.

### Results

Agreement with incentives was mixed (ranging from 34-46%) among a representative sample of 1144 [UK-British](#) adults. Mean agreement score was highest for a free breast pump; and lowest for incentives for smoking abstinence after birth. More women disagreed with shopping vouchers than men. Those with lower levels of education disagreed more with smoking cessation incentives and a breast pump. Those aged 44 or under agreed more with all incentive strategies compared to those aged 65 and over, particularly provider targets for smoking cessation. Non-white ethnic groups agreed particularly with breastfeeding incentives. Current smokers with previous stop attempts and respondents who had breastfed children agreed with providing vouchers for the respective behaviours. Up to £40 per month vouchers for behaviour change were acceptable (>85%).

### Conclusion

Women and the less educated were more likely to disagree, but [these men and women](#) of child-bearing age to agree, with incentives designed for their benefit. Trials evaluating reach, impact on health inequalities and ethnic groups are required prior to implementing incentive interventions.

**Prospero Registration:** CRD42012001980 [for the systematic reviews informing the survey design.](#)

1  
2  
3  
4  
5  
6  
7  
8  
9  
10  
11  
12  
13  
14  
15  
16  
17  
18  
19  
20  
21  
22  
23  
24  
25  
26  
27  
28  
29  
30  
31  
32  
33  
34  
35  
36  
37  
38  
39  
40  
41  
42  
43  
44  
45  
46  
47  
48  
49  
50  
51  
52  
53  
54  
55  
56  
57  
58  
59  
60

For peer review only

## Article summary

### Strengths and limitations of this study

This large cross sectional survey of attitudes to incentives for smoking cessation around pregnancy and for breastfeeding was conducted by an internationally recognised independent company using rigorous methods to achieve a representative sample of the ~~UK~~ British general public.

Our multi-disciplinary mixed methods approach to survey design and to investigating two behaviours concurrently, used an innovative participatory approach to incorporate service user perspectives.

Original findings show that women and those with fewer educational qualifications are more likely to disagree with incentives, raising concerns about the implications for health inequalities, as these are intended target populations for behaviour change.

Important limitations relate to the unknown generalisability to other countries; non-responder and selection biases; potential confounding between smoking cessation and breastfeeding and other unknown confounders.

Although we randomised the order of smoking and breastfeeding questions, further framing effects are possible particularly for the introductory statements.

## Introduction

Government interventions to change lifestyle behaviours are increasingly incorporating incentives to encourage healthy choices<sup>1</sup>, but directly paying people is seen to be the least acceptable approach<sup>2</sup>, with minimally intrusive interventions deemed more acceptable.<sup>1</sup> Experimental studies investigating incentives for smoking cessation in a general population show that incentive acceptability increases with effectiveness.<sup>3</sup> Media coverage of incentive interventions tends to focus on a range of concerns including perceived unfairness to those who already make healthy choices; appearing to reward unhealthy behaviours; potential for abuse; opportunity costs; the need to monitor and safeguard; and “Big Brother” or “nanny state” authoritarianism. However, incentives can demonstrate to people that they are worthy of being helped and can facilitate connections between recipients and care providers.<sup>4</sup> Incentives addressing outcomes for children appear more acceptable than outcomes for adults.<sup>1,5</sup>

In the UK there are marked inequalities in health between social groups. Incentives are one strategy that could be used to redistribute resources through targeting or proportionate universalism,<sup>6</sup> as lifestyle behaviours that compromise health around childbirth are socially patterned<sup>7</sup> and cluster in more disadvantaged communities.<sup>8</sup> For example, pregnant mothers aged 20 or under are: more than five times less likely to be breastfeeding at four months; three times more likely to smoke before or during pregnancy and are less likely to stop smoking compared to mothers aged 35 or over.<sup>7</sup> In 2010 in the UK, the breastfeeding initiation rate was 90% for mothers in managerial and professional occupations, compared with 74% of mothers in routine and manual occupations, with a difference in smoking before or during pregnancy of 14% and 40% respectively.<sup>7</sup> In 2010, 32% of pregnant women lived in a household where at least one other person smoked during pregnancy.<sup>7</sup>

There is promising evidence supporting financial incentives for smoking cessation in pregnancy:<sup>9-11</sup> interventions that include incentives are more effective than pharmacotherapy and/or psycho-social interventions alone.<sup>9</sup> However, the level of the incentive and the nature of accompanying behaviour change techniques provided alongside incentives, are likely to be confounders.<sup>9,11</sup> Reported trials to date have small samples.<sup>9-11</sup> In addition, important concerns about limited reach, particularly to the more marginalised in society, have been raised.<sup>12,13</sup> There are fewer incentive trials of interventions to initiate or maintain breastfeeding<sup>14</sup> and generalisability of support interventions to predominantly formula feeding cultures like the UK is uncertain.<sup>15</sup>

1  
2  
3 This survey aimed to investigate the public acceptability of a shortlist of promising incentive  
4 strategies for stopping smoking in pregnancy or for breastfeeding. This is particularly  
5 important in countries where health care is state funded. The ultimate study aim was to  
6 inform the design of incentive intervention trials for smoking in pregnancy and for  
7 breastfeeding and to improve understanding of the mechanisms of action of incentives. As  
8 this is a relatively new field of research, a broad definition of incentive was applied (Panel 1).  
9  
10  
11

## 12 13 **Methods**

### 14 **Survey design**

15  
16 A shortlist of seven promising incentive strategies (Panel 2) had been developed prior to the  
17 survey administration, informed by evidence syntheses, input from mother and baby group  
18 members who were partners in the research and qualitative research with a range of  
19 stakeholders.<sup>16</sup> A wide range of incentives were considered to inform the shortlist, including  
20 food vouchers, baby related items, such as diapers, gifts, beauty treatments for the mother  
21 and incentives aimed at the partner e.g football tickets. Incentives provided for preparatory  
22 behaviours, for example, attending a support group or one-to-one session, and  
23 unpredictable incentives like raffles, were also considered. A justification for our selected  
24 shortlist is described in detail elsewhere.<sup>16</sup> In the survey (Web\_1, p1-4), acceptability of the  
25 shortlisted interventions was measured on a 5-point Likert style scale from strongly agree to  
26 strongly disagree. These subgroup responding strongly agree, agree or neither agree nor  
27 disagree to voucher incentives were asked whether incentives should be universally  
28 provided or to low income women only and to choose an acceptable value (£2, £10, £20,  
29 £40, £60, £80) for shopping vouchers provided monthly to women who prove that they have  
30 stopped smoking or are breastfeeding. The values were selected to represent the range  
31 identified in the evidence syntheses. Careful consideration was given to framing effects, as  
32 greater acceptability is reported for a *reward* rather than *payment*<sup>17</sup> and with increased  
33 effectiveness.<sup>3</sup>  
34  
35  
36  
37  
38  
39  
40  
41  
42  
43  
44

### 45 **Data collection**

46  
47 Ipsos MORI used a controlled form of random location sampling to identify 161 geographical  
48 sites (Web\_2, p5-6) using a method of quota sampling which has been independently  
49 evaluated<sup>18</sup>. Trained field researchers were asked to interview five people at home from 250  
50 addresses at each site, to obtain a nationally and regionally representative sample of adults  
51 aged 18 or over between 22 March 2013 – 15 April 2013. Interlocking quotas were set for  
52 age, sex, working status, and tenure based on the known profile of Great Britain (from ONS  
53 2011 estimates for England and Wales and from General Register Office for Scotland 2011  
54 mid-year estimates, and from National Readership Survey data. National Readership Survey  
55  
56  
57  
58  
59  
60

1  
2  
3 profiles are commonly used for this purpose they provide a basis for interlocking quotas e.g.  
4 sex within working status. Quotas were set for age, sex, and region and the data weighted to  
5 the known profile of Great Britain using age, sex, government office region, social grade,  
6 taken a foreign holiday in the last three years, housing tenure, working status, and the  
7 number of cars in the household Interviewers used Computer Assisted Personal  
8  
9 Interviewing (CAPI) with randomisation of the order for smoking and breastfeeding incentive  
10 questions generated independently and automated using CAPI software, to investigate  
11 question order framing effects. Incentive questions were asked after the demographic  
12 questions, but before the parent, smoking and breastfeeding status questions.  
13  
14  
15  
16  
17

### 18 **Statistical analysis**

19 An *a priori* target sample size of 1000 was set to allow us to estimate proportions to within  
20 3% margin of error with 95% level of confidence. A priori questions asked:  
21  
22

- 23 1. Is the acceptability of the seven shortlisted incentive strategies influenced according  
24 to age (categories 18-24, 25-34, 35-44, 45-54, 55-59, 60-64, 65 and over); sex;  
25 social grade (A and B, C1, C2, D, E); region (North, North West, Yorkshire and  
26 Humberside, East Midlands, West Midlands, East Anglia, South East, South West,  
27 London, Wales, Scotland); ethnicity (White British, Other Ethnicity); education  
28 (University, GCSE or equivalent, A-level or equivalent, no formal qualifications, still  
29 studying or other qualifications, or don't know); having children (yes, no); personal  
30 experience of smoking (never smoked, ex-smoker, current smoker - failed to stop, or  
31 no attempts to stop); had a child ever been breastfed (even if for only a day or two)?  
32  
33 2. What are the independent predictors of acceptability of the shortlist of incentive  
34 strategies?  
35  
36 3. What value of incentive is most acceptable and what are the independent predictors  
37 of the preferred incentive value?  
38  
39 4. Are universal incentives preferred to incentives targeted at low income women and  
40 what are the independent predictors for preference?  
41  
42  
43  
44  
45

46 Data were described using the appropriate summary statistics where relevant. Responses to  
47 the Likert style outcome survey items were summarised by number, percentage and mean,  
48 and graphed using bar charts. Responses to these outcome items were tabulated, broken  
49 down by the independent predictor variables specified above. Net agreement (agree and  
50 strongly agree) and net disagreement (disagree and strongly disagree) were also reported  
51 as number and percentage. Simple and multiple ordered logit regression models were used  
52 to determine the independent predictors of acceptability for the shortlist. The relationship  
53 between predictor and outcomes variables was summarised using the odds ratio and 95%  
54 confidence intervals. For the financial value and targeting of incentives to low income women  
55  
56  
57  
58  
59  
60



1  
2  
3 only (research questions 3 and 4) two part models were used. For research question 3, the  
4 value of incentives, a probit model was used to estimate a 'positive' response (i.e. strongly  
5 agree, agree, or neither agree nor disagree) and then linear regression was used to model  
6 the amount of shopping voucher acceptable conditional on a positive response. For research  
7 question 4, targeting low income women only, a similar model was used but as the  
8 conditional response here was dichotomous a probit model was used instead of linear  
9 regression. In all models the most affluent status was used as the reference category where  
10 appropriate (i.e. male; white ethnicity; university qualification; Social grade A or B; resident in  
11 London; no children; never smoked; child breastfed). Age was entered as 5-year categories.  
12 All analyses were done in Stata 13 (StataCorp. 2013. Stata Statistical Software: Release 13.  
13 College Station, TX: StataCorp LP).

### 21 **Role of the funding source**

22 The funders had no role in the data collection, analysis, interpretation, the writing of the  
23 manuscript or the decision to submit.

### 27 **Findings**

28 The characteristics of the 1144 representatives of the [UK-British](#) public who participated in  
29 the CAPIBUS survey and any variables with missing data are detailed in Table 1. [Detailed](#)  
30 [tables reporting weighted with un-weighted data are available \(Web 3\).](#)

### 35 **Overall acceptability of incentives**

36 The acceptability of the seven promising incentive strategies was mixed (Figure 1 and Table  
37 2). Between 34-46% agreed with these incentives. Overall, the most acceptable incentive,  
38 with net agreement of 46% and net disagreement of 28%, was to provide a breast pump  
39 worth £40 to help women continue breastfeeding. The least acceptable incentives were  
40 shopping vouchers given to women who continue to stop smoking after birth (net agreement  
41 37% and net disagreement 47%) or given to women to maintain a smoke-free home (net  
42 agreement 34% and net disagreement 46%). The general public expressed collective  
43 uncertainty about providing funding to local health service providers to meet smoking  
44 cessation in pregnancy or breastfeeding targets: just over a third of the respondents agreed  
45 and a third disagreed. Framing effects with question randomisation were observed ([Web 3 4](#),  
46 p7-8). Significantly higher agreement with all breastfeeding incentive strategies was  
47 observed when breastfeeding questions were asked before the smoking questions: vouchers  
48 for breastfeeding OR 2.00 (95% CI 1.61, 2.46; p< 0.001); a free breast pump OR 1.32 (95%  
49 CI, 1.08, 1.62; p<0.008); and provider incentives for breastfeeding targets OR 1.44 (95% CI,  
50 1.17, 1.77; p<0.001). Differences in agreement for all smoking cessation incentive strategies  
51  
52  
53  
54  
55  
56  
57  
58  
59  
60



1  
2  
3 were non-significant when the smoking questions were asked before the breastfeeding  
4 questions.  
5  
6

### 7 ***Independent predictors of agreement with incentives***

8  
9 Table 3 describes the independent predictors of agreement with incentives. For aid of  
10 interpretation and comparison, we have summarised the odds ratios (ORs) into groups (OR  
11 <0.5, >=0.5 to <1.0, >=1.0 to <1.5, >=1.5 to <2.0, and >=2.0). Full results tables are  
12 available ([Web4Web 5](#), p9-44). Being of childbearing age (44 and under) was an  
13 independent predictor of agreement with all seven incentive strategies, with agreement  
14 generally decreasing with increased age. Agreement amongst the 44 and under age group  
15 compared to the 65 and over age group was strongest for provider targets for smoking  
16 cessation in pregnancy (OR>=2.0).  
17  
18  
19  
20  
21

22  
23 Women who are (or would have been when younger) the intended recipients of the  
24 vouchers, were less likely to agree with any shopping vouchers for: smoking cessation  
25 during pregnancy OR 0.71 (95% CI 0.57, 0.88; p = 0.002), after birth OR 0.68 (95% CI 0.55,  
26 0.85; p=0.001), smoke-free homes OR 0.72 (95% CI 0.58, 0.90; p=0.003) or breastfeeding  
27 OR 0.77 (95% CI 0.62, 0.95; p = 0.016) when compared to men.  
28  
29  
30  
31

32 Respondents with lower educational level, when compared to those with degree level  
33 qualifications, were more likely to disagree ( $0.5 \leq \text{OR} < 1.0$ ) with shopping voucher incentives  
34 given to women for smoking cessation before or after birth, a free breast pump, or for  
35 additional funding to local health services for meeting smoking cessation targets. There was  
36 no evidence of difference across education groups for vouchers for breastfeeding or  
37 additional payments to local health services for meeting breastfeeding targets.  
38  
39  
40  
41

42 The associations with lower social grade when compared to social grade A and B combined  
43 were less clear. Social grade E predicted agreement with shopping vouchers for smoking  
44 cessation in pregnancy (OR 1.74; 95% CI 1.12, 2.70; p = 0.014) and a free breast pump (OR  
45 1.57; 95% CI 1.00, 2.46; p = 0.05); social grade C2 predicted agreement with vouchers for  
46 continued smoking cessation after birth (OR 1.64; 95% CI 1.18, 2.27 p = 0.003); but in  
47 contrast social grade C1 predicted disagreement with additional funding to local health  
48 services for meeting smoking cessation targets (OR 0.68; 95% CI 0.50, 0.94 p = 0.019).  
49  
50  
51  
52  
53

54  
55 Being from a non-white British ethnic group, when compared to being white British, was a  
56 strong predictor of agreeing with breastfeeding vouchers (OR 2.03; 95% CI 1.43, 2.88; p<  
57 0.001) and with additional funding to local health services for meeting breastfeeding targets  
58  
59  
60

(OR 2.31; 95% CI 1.63, 3.29;  $p < 0.001$ ) but not for a free breast pump. Being from a non-white British group also predicted agreement with vouchers for stopping smoking in pregnancy (OR 1.42; 95% CI 1.01, 1.99;  $p = 0.047$ ) and a smoke-free home (OR 1.49; 95% CI 1.06, 2.08;  $p = 0.021$ ).

Current smokers who had tried stopping in the past were more likely to agree with vouchers for stopping smoking in pregnancy (OR 1.63; 95% CI 1.18, 2.26;  $p = 0.003$ ) and for maintaining a smoke-free home after birth (OR 1.48; 95% CI 1.08, 2.04;  $p = 0.016$ ), but not for continued smoking cessation after birth, or provider incentives to meet smoking cessation targets. Those with a breastfed child were more likely to agree with vouchers for breastfeeding OR 1.67 (95% CI 1.24, 2.25;  $p = 0.001$ ) and with a free breast pump OR 1.84 (95% CI 1.36, 2.49;  $p = <0.001$ ), but not with provider incentives for meeting breastfeeding targets, when compared to those with children that had not been breastfed.

Where respondents did not disagree (i.e. answered strongly agree, agree or neither agree nor disagree) with providing shopping vouchers as an incentive, up to £40 per month vouchers for behaviour change were acceptable (>85%) (Table 4).<sup>27</sup> This was consistent for both smoking cessation and breastfeeding. For smoking cessation in pregnancy, being a current smoker who has tried to stop (compared to never smoked), or having a child previously breastfed (compared to no breastfed children) was correlated with a higher value of shopping voucher (Web 45, Table 15). For breastfeeding, having a child previously breastfed (compared to no breastfed children) was correlated with an increased value of shopping voucher (Web 45, Table 17).

Universal provision rather than targeting low income women was preferred by 364 (55%) of the 660 who did not disagree with vouchers for smoking cessation in pregnancy, compared with 296 (44.9%) who thought that vouchers should be targeted at low income women only. Agreement with universal provision of vouchers for breastfeeding was similar: 367 (52.3%) compared to 330 (47.4%) thought that incentives should be provided to low income women only. Disagreement with vouchers being given to low income women only was associated with being a woman (Web 45, Tables 16 and 18) but this was only significant for breastfeeding.

## Discussion

In this representative UK-British sample, public opinion regarding the acceptability of incentives for smoking cessation in pregnancy and breastfeeding was mixed. Being Men and women of child-bearing age (44 or under), and therefore a representative of the target

1  
2  
3 population for this behaviour change strategy, was the only independent predictor of  
4 agreement with all seven incentive strategies. Of concern, women were significantly more  
5 likely to disagree with any of the shopping voucher incentive strategies compared to men.  
6 General public respondents with lower educational level were more likely to disagree with  
7 any voucher incentives to women for smoking cessation, or with a free breast pump.  
8 Agreement appears to be strongest in non-white ethnic groups. As reported by others,<sup>1</sup>  
9 people with direct experiences of attempting the target behaviours were more likely to agree  
10 with incentives.  
11  
12  
13  
14

15  
16  
17 This is the largest survey of public attitudes to incentive provision aiming to change lifestyle  
18 behaviours and was conducted by an independent company with an international reputation  
19 for conducting surveys of this type. Methodological research indicates that high quality, well  
20 controlled quota sampling in survey design has a negligible impact on the bias and precision  
21 of estimates compared to that in a simple random sample.<sup>18</sup> Our multi-disciplinary mixed  
22 methods approach to survey design and investigating two behaviours concurrently, with an  
23 innovative participatory approach to incorporating service user perspectives through co-  
24 applicant mother and baby groups located in disadvantaged areas, are novel.<sup>16,19<sup>8</sup></sup> Important  
25 limitations relate to the unknown generalisability to other countries; non-responder and  
26 selection biases; and other potential confounders. This research was commissioned to  
27 investigate two behaviours concurrently, and this may be considered as either a strength or  
28 a limitation. There is a tradition of researching lifestyle behaviours separately, but from an  
29 individual and a social network perspective they are often complexly inter-related.<sup>7,16</sup> In  
30 addition, smoking cessation and breastfeeding are associated and may confound each  
31 other, as women who stop smoking are more likely to breastfeed than those who continue to  
32 smoke.<sup>20,21</sup> The framing effects observed by randomising question order are important and  
33 further unknown framing effects could be present. In particular the introduction contained a  
34 stronger statement about the evidence for incentives changing smoking behaviour than for  
35 breastfeeding, as is consistent with current evidence<sup>9-11,14</sup> and evidence of effectiveness has  
36 been shown to impact on acceptability.<sup>3</sup> We propose that more research should investigate  
37 health related behaviours concurrently to understand their complex inter-relationships.  
38  
39  
40  
41  
42  
43  
44  
45  
46  
47  
48  
49

50 The implications of our findings for efforts to reduce health inequalities are important. The  
51 disagreement with incentive strategies amongst those with lower educational level, which is  
52 considered the strongest predictor of disadvantage,<sup>6</sup> is unexpected and a concern as  
53 addressing health inequalities is a government priority. Smoking in pregnancy and not  
54 breastfeeding are highest amongst the less educated, the younger aged and white British  
55 women.<sup>7</sup> This data adds to reports of poor reach of incentive interventions, particularly to the  
56  
57  
58  
59  
60

1  
2  
3 most marginalised individuals.<sup>12,13</sup> Universal incentives were preferred to incentives targeted  
4 at low income women, with concerns about unintended consequences such as stigma and  
5 value judgments raised in linked qualitative data.<sup>16</sup> Differential uptake across educational  
6 groups and the potential for health inequalities to increase is a concern, as noted for lifestyle  
7 behaviour change interventions.<sup>4922</sup> Any assumption that incentives might redistribute  
8 resources and/or help to reduce health inequalities requires further testing.  
9  
10  
11

12  
13  
14 Women's disagreement with incentive strategies is particularly problematic due to the onus  
15 currently placed on women by health services and governments to change their health  
16 related behaviours. [Similar disagreement with paying women to stop smoking in pregnancy  
17 was reported for a convenience sample of pregnant women attending an Australian  
18 antenatal clinic.](#)<sup>23</sup> Some understanding of women's disagreement with shopping voucher  
19 incentives for individual or household behaviour change, which may seem counter-intuitive,  
20 is revealed in narratives of blame, pressure and stigma.<sup>16, 249-254</sup> In addition, psychological  
21 theory suggests that providing extrinsic motivation through financial incentives alone might  
22 be insufficient and meet with resistance, with intrinsic motivation required for more sustained  
23 behaviour change.<sup>263,247</sup> Qualitative data from this study highlights that the real life barriers  
24 and facilitators to living healthy lives need to be addressed concurrently with incentive  
25 interventions to optimise the likelihood of effectiveness.<sup>16</sup> For example, current smokers who  
26 reported failed attempts to stop were more likely to agree with shopping voucher incentives  
27 for a smoke-free home, but disagree with providing vouchers if the mother continues to  
28 abstain from smoking after birth. This fits with the evidence on relapse being associated with  
29 whether the partner and/or social network of a pregnant woman smokes.<sup>282</sup> Similarly, linked  
30 qualitative data suggest that a free breast pump is perceived to address more intrinsic and  
31 extrinsic barriers to continued breastfeeding than shopping vouchers, such as overcoming  
32 embarrassment with performing in public; resuming social lives; sharing the feeding-bonding  
33 experience with partners and relieving the mother as the sole supplier on demand.<sup>16</sup>  
34 However, breast pumps are an uncertain proxy outcome as the relationship between  
35 characteristics, use and feeding outcomes are uncertain.<sup>295</sup>  
36  
37  
38  
39  
40  
41  
42  
43  
44  
45  
46  
47

48  
49 Robust randomised controlled trials reporting reach, impact on health inequalities, ethnic  
50 groups, experience outcomes and any unintended consequences, in addition to the target  
51 behaviours, are required prior to any implementation or introduction of policy decisions  
52 around incentive interventions for smoking cessation in pregnancy, or breastfeeding.  
53  
54  
55

#### 56 **Acknowledgements:**

57  
58  
59  
60

1  
2  
3 We would like to thank our co-applicants and research team: Mastrick Café Crèche,  
4 Aberdeen and St Cuthbert's and Palatine Children's Centre, Blackpool. Shelley Farrar and  
5 Nicola Crossland contributed to the survey design. Grant co-applicants Professor Fiona  
6 Dykes, Professor David Tappin and Dr Falko Sniehotta for their collaboration and input to  
7 the overall BIBS study design. We would like to thank the members of the public, the  
8 women, families and staff from health services, local government, voluntary sector and other  
9 organisations, who generously provided their time by participating in the BIBS study. Other  
10 members of the BIBS study team, in particular, Fiona Stewart and Cynthia Fraser for  
11 providing guidance with literature searching and reference management; Lara Kemp for  
12 providing secretarial support.  
13  
14  
15  
16  
17

18  
19  
20 [Prospero Registration: CRD42012001980 for the systematic reviews informing the survey](https://doi.org/10.1136/bmjopen-2019-025180)  
21 [design.](https://doi.org/10.1136/bmjopen-2019-025180)  
22  
23  
24  
25  
26  
27  
28  
29  
30  
31  
32  
33  
34  
35  
36  
37  
38  
39  
40  
41  
42  
43  
44  
45  
46  
47  
48  
49  
50  
51  
52  
53  
54  
55  
56  
57  
58  
59  
60

### Conflicts of interest

All authors have completed the Unified Competing Interest form at [www.icmje.org/coi\\_disclosure.pdf](http://www.icmje.org/coi_disclosure.pdf) (available on request from the corresponding author) and declare that (1) no authors have support from any company for the submitted work; (2) no authors have relationships with companies that might have an interest in the submitted work in the previous 3 years; (3) their spouses, partners, or children have no financial relationships that may be relevant to the submitted work; and (4) LB has non-financial interests that may be relevant to the submitted work. Ipsos Mori were commissioned to work with the research team by the University of Aberdeen.

### Contributions

Pat Hoddinott wrote the first draft of this paper and led the BIBS study. All co-authors have contributed to the design, analysis and paper writing and meet the ICMJE criteria for authorship. Heather Morgan co-ordinated service user co-applicant mother and baby group involvement in Aberdeen; contributed to the survey design, piloting, analysis decisions and wrote the first draft of the results. Graeme MacLennan led the statistical analysis of the survey data and contributed to writing the methods and results sections. Gill Thomson co-ordinated service user co-applicant mother and baby group involvement in Blackpool and contributed to the survey design, piloting and reporting of the results. Linda Bauld contributed to the survey design and reporting of the results. Kate Sewel, Lorraine Murray and their colleagues at Ipsos MORI, contributed to the survey design, collected the survey data, and provided the data as an SPSS file for further analysis. Anne Ludbrook contributed to the survey design and, with Deokhee Yi, analysed the incentive value and targeting questions in the survey and reported these sections of the results. Marion Campbell provided methodological and statistical input to the survey design, analysis and reporting of results.

### Ethics approvals

Full ethical approval for this study, including service user involvement, was obtained from the North of Scotland Research Ethics Committee (NOSRES, reference number: 12/NS/0041, 12<sup>th</sup> April 2012) and the BUSH (Built & Natural Environment, Sport and Health) Ethics Committee, University of Central Lancashire (BUSH064, 8<sup>th</sup> May 2012).

### Sources of funding

This project was commissioned by the NIHR Health Technology Assessment Programme (10/31/02) and will be published in full in *Health Technology Assessment*. Further information including the protocol is available at:

<http://www.nets.nihr.ac.uk/projects/hta/103102>. This report presents independent research commissioned by the National Institute for Health Research (NIHR). The views and opinions expressed by authors in this publication are those of the authors and do not necessarily reflect those of the NHS, the NIHR, MRC, CCF, NETSCC, the HTA programme or the Department of Health

The Nursing, Midwifery and Allied Health Professions Research Unit, University of Stirling, the Health Services Research Unit, and Health Economics Research Unit, Institute of Applied Health Sciences, University of Aberdeen are all core-funded by the Chief Scientist Office of the Scottish Government Health and Social Care Directorates.

### Transparency statement

All authors are independent of the funding bodies, had full access to all of the data reported in this paper and take responsibility for the integrity of the data and the accuracy of the data analysis. PH took the decision to submit for publication and is the guarantor. She affirms that the manuscript is an honest, accurate, and transparent account of the study being reported; and that no important aspects of the study have been omitted.

### Data sharing

The full dataset is available from the corresponding author: [p.m.hoddinott@stir.ac.uk](mailto:p.m.hoddinott@stir.ac.uk).

### Figure 1. Bar charts of general public agreement with the shortlist of incentive strategies

SD: Strongly disagree  
D: Disagree  
N: Neither agree nor disagree  
A: Agree  
SA: Strongly agree  
BF: Breastfeeding  
SS: Stop smoking

### References

1. Diepeveen S, Ling T, Suhrcke M, Roland M, Marteau T. Public acceptability of government intervention to change health-related behaviours: A systematic review and narrative synthesis. *BMC Public Health*. 2013;13(1):756.



- 1  
2  
3 2. Park JD, Mitra N, Asch DA. Public opinion about financial incentives for smoking  
4 cessation. *Prev Med*. 2012;55, Supplement:S41-S45.  
5
- 6 3. Promberger M, Dolan P, Marteau T. "Pay them if it works": Discrete choice experiments  
7 on the acceptability of financial incentives to change health related behaviour. *Soc Sci Med*.  
8 2012;75(12):2509-2514.  
9
- 10 4. Thomson G, Dykes F, Hurley M, Hoddinott P. Incentives as connectors: Insights into a  
11 breastfeeding incentive intervention in a disadvantaged area of North-West England. *BMC*  
12 *Pregnancy and Childbirth*. 2012;12(1):22.  
13
- 14 5. Jeffery RW. Financial incentives and weight control. *Prev Med*. 2012;55, Supplement:S61-  
15 S67.  
16
- 17 6. Marmot M. *Fair society, healthy lives: The Marmot review. Strategic review of health*  
18 *inequalities in England post 2010*. [accessed March 2014]. Available from URL:  
19 <http://www.marmotreview.org/>.  
20
- 21 7. McAndrew F, Thompson J, Fellows L, Large A, Speed M, Renfrew MJ. *Infant feeding*  
22 *survey 2010*. [accessed March 2014]. Available from URL:  
23 <http://www.hscic.gov.uk/catalogue/PUB08694/ifs-uk-2010-sum.pdf>  
24
- 25 8. Buck D, Frosini F. *Clustering of unhealthy behaviours over time: Implications for policy*  
26 *and practice*. London: The Kings Fund; 2012..  
27
- 28 9. Chamberlain C, O'Mara-Eves A, Oliver S, et al. Psychosocial interventions for supporting  
29 women to stop smoking in pregnancy. *Cochrane Database of Syst Rev*,  
30 2013;Issue10:CD001055.  
31
- 32 10. Higgins ST, Washio Y, Heil SH, et al. Financial incentives for smoking cessation among  
33 pregnant and newly postpartum women. *Prev Med*. 2012;55, Supplement(0):S33-S40.  
34
- 35 11. Hoddinott P, Hislop J, Morgan H, et al. Incentive interventions for smoking cessation in  
36 pregnancy: A mixed methods evidence synthesis. *The Lancet*. 2012;380, Supplement  
37 3(0):S48.  
38
- 39 12. Radley A, Ballard P, Eadie D, MacAskill S, Donnelly L, Tappin D. Give it up for baby:  
40 Outcomes and factors influencing uptake of a pilot smoking cessation incentive scheme for  
41 pregnant women. *BMC Public Health*. 2013;13(1):343.  
42
- 43 13. Schmidt H, Voigt K, Wikler D. Carrots, sticks, and health care reform — problems with  
44 wellness incentives. *N Engl J Med*. 2010;362(2):e3.  
45  
46  
47  
48  
49  
50  
51  
52  
53  
54  
55  
56  
57  
58  
59  
60



- 1  
2  
3 14. Renfrew MJ, McCormick FM, Wade A, Quinn B, Dowswell T. Support for healthy  
4 breastfeeding mothers with healthy term babies. *Cochrane Database of Syst Rev*.  
5 2012;Issue 5:CD001141  
6  
7  
8 15. Hoddinott P, Seyara R, Marais D. Global evidence synthesis and UK idiosyncrasy: Why  
9 have recent UK trials had no significant effects on breastfeeding rates? *Maternal & Child*  
10 *Nutrition*. 2011;7:221-227.  
11  
12  
13 16. [Morgan H, Hoddinott P, Thomson G, Crossland N, Farrar S, Yi D, Hislop J, Hall Moran](#)  
14 [V, MacLennan G, Dombrowski SU, Rothnie K, Stewart F, Bauld L, Ludbrook A, Dykes F,](#)  
15 [Sniehotta FF, Tappin D, Campbell M. Benefits of incentives for breastfeeding and smoking](#)  
16 [cessation in pregnancy \(BIBS\): a mixed methods study to inform trial design. \[in press\].](#)  
17 [Health Technology Assessment 2014.](#)  
18 [\\_HTA—10/31/02. BIBS: Benefits of incentives for breastfeeding and smoking cessation: A](#)  
19 [platform study for a trial.](#) [accessed March 2014]. Available from URL  
20 <http://www.nets.nihr.ac.uk/projects/hta/103102>.  
21  
22  
23  
24  
25  
26 17. Eunson J, Murray L. *The acceptability of carrots*. Edinburgh: Ipsos MORI Scotland; 2012  
27 [accessed March 2014]. Available from URL: <http://www.ipsos->  
28 [mori.com/newsevents/ca/1233/The-acceptability-of-carrots.aspx](http://www.ipsos-mori.com/newsevents/ca/1233/The-acceptability-of-carrots.aspx).  
29  
30  
31 18. Raab, G. (2009). [Technical Annex to Davidson S., Martin C., Treanor S. Scottish](#)  
32 [Environmental Attitudes and Behaviours Survey 2008: Technical Report. Scottish](#)  
33 [Executive. \[Accessed June 2014\]. Available from URL:](#)  
34 <http://www.scotland.gov.uk/Resource/Doc/265441/0079493.pdf>  
35  
36  
37 189. Morgan H, **Hoddinott P**, Thomson G, Crossland N, Dykes F, McCann S, Campbell MK.  
38 Service user groups as co-applicants on a platform study for a trial. *Trials*: 2013, 14(Suppl  
39 1):O35.  
40  
41  
42 20. Higgins TM, Higgins ST, Heil SH, Badger GJ, Skelly JM, Bernstein IM et al. Effects of  
43 [cigarette smoking cessation on breastfeeding duration. \*Nicotine Tobacco Res\* 2010;12:483-8.](#)  
44  
45  
46 21. Kendzor DE, Businelle MS, Costello TJ, Castro Y, Reitzel LR, Vidrine JI et al. Breast  
47 [feeding is associated with postpartum smoking abstinence among women who quit smoking](#)  
48 [due to pregnancy. \*Nicotine Tobacco Res\* 2010;12:983-8.](#)  
49  
50  
51 4922. Jepson R, Harris F, Platt S, Tannahill C. The effectiveness of interventions to change  
52 six health behaviours: A review of reviews. *BMC Public Health*. 2010;10(1):538.  
53  
54  
55  
56  
57  
58  
59  
60

- 1  
2  
3 | [293. Lynagh M, Bonevski B, Symonds I, Sanson-Fisher RW. Paying women to quit smoking](#)  
4 | [during pregnancy? Acceptability among pregnant women. \*Nicotine Tobacco Res\*](#)  
5 | [2011;13:1029-36.](#)
- 6  
7  
8 | [24.](#) Ingall G, Cropley M. Exploring the barriers of quitting smoking during pregnancy: A  
9 | systematic review of qualitative studies. *Women and Birth*. 2010;23(2):45-52.
- 10  
11 | [245.](#) Hoddinott P, Craig LCA, Britten J, McInnes RM. A serial qualitative interview study of  
12 | infant feeding experiences: Idealism meets realism. *BMJ Open* 2012;2:e000504.
- 13  
14 | [236.](#) Frey B. *Not just for the money. An economic theory of personal motivation*. Brookfield  
15 | VT: Edward Elgar Publishing; 1997.
- 16  
17 | [247.](#) Deci EL, Koestner R, Ryan RM. A meta-analytic review of experiments examining the  
18 | effects of extrinsic rewards on intrinsic motivation. *Psychological bulletin*. 1999;125:627-668.
- 19  
20 | [228.](#) Graham H, Sowden A, Flemming K, Heirs M, Fox D. *Using qualitative research to*  
21 | *inform interventions to reduce smoking in pregnancy in England: A systematic review of*  
22 | *qualitative studies*. Public Health Research Consortium; 2012.
- 23  
24 | [259.](#) Becker GE, Cooney F, Smith HA. Methods of milk expression for lactating women.  
25 | *Cochrane Database Syst Rev* 2011;Issue 12:CD006170.
- 26  
27  
28  
29  
30  
31  
32  
33  
34  
35  
36  
37  
38  
39  
40  
41  
42  
43  
44  
45  
46  
47  
48  
49  
50  
51  
52  
53  
54  
55  
56  
57  
58  
59  
60

**Panel-Box 1 (to be included in main paper). Definition of an incentive**

Incentives include financial (positive or negative) and non-financial tangible incentives or rewards. This includes free or reduced cost items that have a monetary value or an exchange value, like refreshments, baby products or services like child care or ironing. The definition excludes intangible incentives such as supportive, motivational or persuasive relationships with professionals or peers. Incentives may be delivered directly or indirectly at local, regional or national level by organisations.

**Panel-Box 2. (to be included in main paper) Shortlist of seven promising incentive strategies**

1. Shopping vouchers for women who prove that they have stopped smoking during pregnancy
2. Shopping vouchers for a woman for two months after the birth of her baby if she proves that she is still not smoking
3. Shopping vouchers for a woman for two months after the birth of her baby if she never lets anyone smoke in her home
4. Shopping vouchers for women who prove that they are breastfeeding for the first 6 months after birth
5. A breast pump costing around £40 provided for free by the health service
6. Additional funding for local health services if they reach targets for the number of women who prove that they have stopped smoking during pregnancy
7. Additional funding for local health services if they reach targets for the number of women who prove that they are breastfeeding

**Table 1. Characteristics of the general public sample (n=1144)**

| Variable                                  | Categories                       | Sample (%) |
|-------------------------------------------|----------------------------------|------------|
| Sex                                       | Male                             | 540 (47.2) |
|                                           | Female                           | 604 (52.7) |
| Age                                       | 18-24                            | 170 (14.9) |
|                                           | 25-34                            | 175 (15.3) |
|                                           | 35-44                            | 181 (15.8) |
|                                           | 45-54                            | 159 (13.9) |
|                                           | 55-59                            | 72 (6.3)   |
|                                           | 60-64                            | 94 (8.2)   |
| Ethnicity                                 | 65<                              | 293 (25.6) |
|                                           | White                            | 985 (86.1) |
|                                           | BME                              | 151 (13.2) |
|                                           | Refused to answer                | 8 (0.7)    |
|                                           | <i>White British</i>             | 914 (79.9) |
|                                           | <i>White Irish</i>               | 11 (1.0)   |
|                                           | <i>White Gypsy/Traveller</i>     | -          |
|                                           | <i>White Other</i>               | 60 (5.2)   |
|                                           | <i>Mixed W/B Caribbean</i>       | 3 (0.3)    |
|                                           | <i>Mixed W/B African</i>         | 1 (<0.1)   |
|                                           | <i>Mixed White and Asian</i>     | 3 (0.3)    |
|                                           | <i>Mixed Other</i>               | 2 (0.2)    |
|                                           | <i>Asian Indian</i>              | 19 (1.7)   |
|                                           | <i>Asian Pakistani</i>           | 47 (4.1)   |
|                                           | <i>Asian Bangladeshi</i>         | 12 (1.1)   |
|                                           | <i>Asian Chinese</i>             | 7 (0.6)    |
| <i>Asian Other</i>                        | 13 (1.1)                         |            |
| Smoking status                            | <i>Black African</i>             | 26 (2.3)   |
|                                           | <i>Black Caribbean</i>           | 7 (0.6)    |
|                                           | <i>Black Other</i>               | 2 (0.2)    |
|                                           | <i>Arab</i>                      | 4 (0.4)    |
|                                           | <i>Other</i>                     | 5 (0.4)    |
|                                           | <i>Refused</i>                   | 8 (0.7)    |
|                                           | Never smoked                     | 573 (50.1) |
| Current smoker, tried to stop smoking     | 175 (15.3)                       |            |
| Current smoker, not tried to stop smoking | 63 (5.5)                         |            |
| Any children                              | Ex-smoker                        | 281 (24.6) |
|                                           | Declined to answer               | 52 (4.6)   |
| Breastfeeding                             | Yes                              | 742 (64.9) |
|                                           | No                               | 402 (35.1) |
| Education                                 | Any children breastfed           | 512 (47.3) |
|                                           | No children breastfed            | 632 (52.5) |
| Social grade                              | GCSE/O-level/CSE/NVQ             | 342 (29.9) |
|                                           | A-level or equivalent            | 193 (16.9) |
|                                           | Degree/Masters/PhD               | 295 (25.9) |
|                                           | No formal qualifications         | 197 (17.2) |
| Survey region                             | Other/Don't know/ Still studying | 117 (10.2) |
|                                           | A                                | 36 (3.2)   |
|                                           | B                                | 203 (17.7) |
|                                           | C1                               | 370 (32.3) |
|                                           | C2                               | 236 (20.6) |
|                                           | D                                | 162 (14.2) |
| Survey region                             | E                                | 137 (12.0) |
|                                           | North                            | 77 (6.7)   |
|                                           | North West                       | 142 (12.4) |
|                                           | Yorks & Humberside               | 104 (9.1)  |
|                                           | West Midlands                    | 109 (6.5)  |
|                                           | East Midlands                    | 66 (5.8)   |
|                                           | East Anglia                      | 41 (3.6)   |
|                                           | South West                       | 81 (7.1)   |
|                                           | South East                       | 200 (17.5) |
|                                           | Greater London                   | 149 (13)   |
| Wales                                     | 66 (5.8)                         |            |
| Scotland                                  | 109 (9.3)                        |            |

**Figure 1. Bar charts of general public agreement with the shortlist of incentive strategies**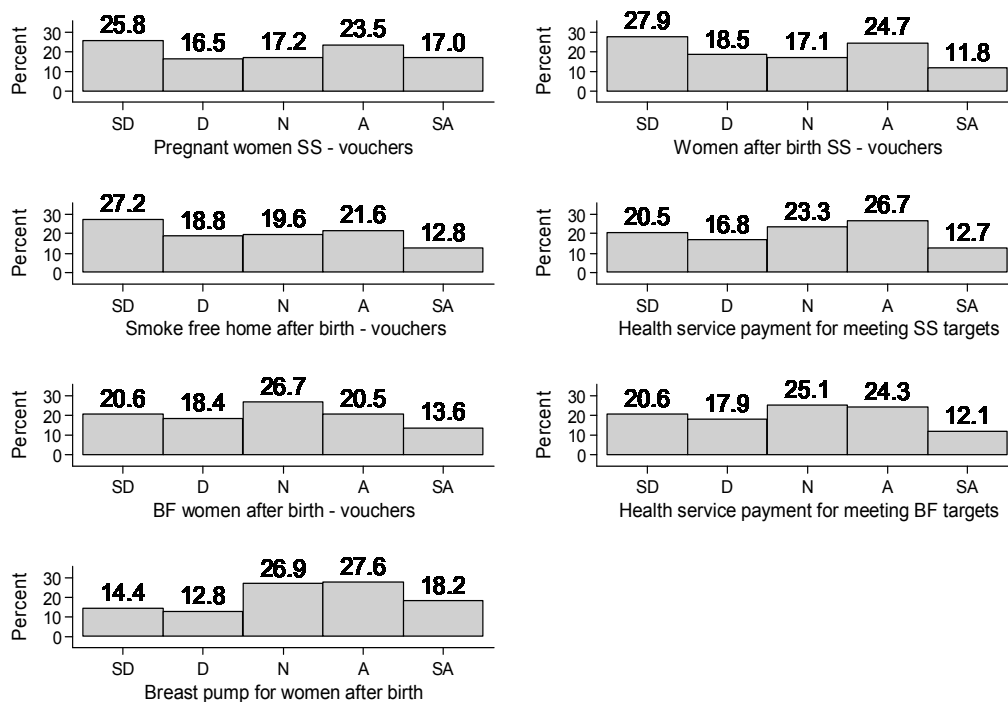

SD: Strongly disagree

D: Disagree

N: Neither agree nor disagree

A: Agree

SA: Strongly agree

BF: Breastfeeding

SS: Stop smoking

**Table 2. Summary of general public agreement with seven incentive strategies**

| Incentive strategy                                                                                                                                   | % Disagree | % Neither | % Agree | Mean |
|------------------------------------------------------------------------------------------------------------------------------------------------------|------------|-----------|---------|------|
| Shopping vouchers for women who prove that they have stopped smoking during pregnancy                                                                | 42.3       | 17.2      | 40.5    | 2.9  |
| Shopping vouchers for a woman for two months after the birth of her baby if she proves that she is still not smoking                                 | 46.4       | 17.3      | 36.5    | 2.7  |
| Shopping vouchers for a woman for two months after the birth of her baby if she never lets anyone smoke in her home                                  | 46.0       | 19.6      | 34.4    | 2.7  |
| Shopping vouchers for women who prove that they are breastfeeding for the first 6 months after birth                                                 | 39.1       | 26.8      | 34.2    | 2.9  |
| A breast pump costing around £40 provided for free on the NHS                                                                                        | 27.8       | 27.0      | 45.8    | 3.2  |
| Additional funding for local health services if they reach targets for the number of women who prove that they have stopped smoking during pregnancy | 37.2       | 23.3      | 39.4    | 2.9  |
| Additional funding for local health services if they reach targets for the number of women who prove that they are breastfeeding                     | 38.6       | 25.1      | 36.4    | 2.9  |

1  
2  
3  
4  
5  
6  
7  
8  
9  
10  
11  
12  
13  
14  
15  
16  
17  
18  
19  
20  
21  
22  
23  
24  
25  
26  
27  
28  
29  
30  
31  
32  
33  
34  
35  
36  
37  
38  
39  
40  
41  
42  
43  
44  
45  
46  
47  
48  
49

Table 3. Summary of the independent predictors of general public agreement **and disagreement** with incentive strategies

|                                                                                                                      | Age <= 44   | Female      | Lower education level | Social grade C or below | Non-white ethnicity | Current smokers who have attempted to stop | Children breastfed |
|----------------------------------------------------------------------------------------------------------------------|-------------|-------------|-----------------------|-------------------------|---------------------|--------------------------------------------|--------------------|
| Shopping vouchers for women who prove that they have stopped smoking during pregnancy                                | 1.5<=OR<2.0 | 0.5<=OR<1.0 | 0.5<=OR<1.0           | 1.5<=OR<2.0 (Grade E)   | 1.0<=OR<1.5         | 1.5<=OR<2.0                                |                    |
| Shopping vouchers for a woman for two months after the birth of her baby if she proves that she is still not smoking | 1.5<=OR<2.0 | 0.5<=OR<1.0 | 0.5<=OR<1.0           | 1.5<=OR<2.0 (Grade C2)  |                     |                                            |                    |
| Shopping vouchers for a woman for two months after the birth of her baby if she never lets anyone smoke in her home  | 1.5<=OR<2.0 | 0.5<=OR<1.0 | 0.5<=OR<1.0           |                         | 1.0<=OR<1.5         | 1.0<=OR<1.5                                |                    |
| Shopping vouchers for women who prove that they are breastfeeding for the first 6 months after birth                 | 1.5<=OR<2.0 | 0.5<=OR<1.0 |                       |                         | OR>=2.0             |                                            | 1.5<=OR<2.0        |
| A breast pump costing around £40 provided for free on the NHS                                                        | 1.5<=OR<2.0 |             | 0.5<=OR<1.0           | 1.5<=OR<2.0 (Grade E)   |                     |                                            | 1.5<=OR<2.0        |
| Additional funding for local health services if they reach targets stopping smoking during pregnancy                 | OR>=2.0     |             | 0.5<=OR<1.0           | 0.5<=OR<1.0 (Grade C1)  |                     |                                            |                    |
| Additional funding for local health services if they reach targets for breastfeeding                                 | 1.5<=OR<2   |             |                       |                         | OR>=2.0             |                                            |                    |

**Table 3 alternative. Summary of the independent predictors of general public agreement with incentive strategies**

|                                                                                                                                                                        | <u>Age &lt;=44</u> | <u>Female</u> | <u>Lower education level</u> | <u>Social grade C or below</u> | <u>Non white ethnicity</u> | <u>Current smoker who have attempted to stop</u> | <u>Children breastfed</u> |
|------------------------------------------------------------------------------------------------------------------------------------------------------------------------|--------------------|---------------|------------------------------|--------------------------------|----------------------------|--------------------------------------------------|---------------------------|
| <u>Shopping vouchers should be provided to women who prove that they have stopped smoking during pregnancy</u>                                                         | ++                 | =             | =                            | ++ (Grade E)                   | ±                          | ++                                               |                           |
| <u>It is acceptable to provide shopping vouchers to a woman for two months after the birth of her baby if she proves that she is still not smoking</u>                 | ++                 | =             | =                            | ++ (Grade C2)                  |                            |                                                  |                           |
| <u>It is acceptable to provide shopping vouchers to a woman for two months after the birth of her baby if she never lets anyone smoke in her home</u>                  | ++                 | =             | =                            |                                | ±                          | ±                                                |                           |
| <u>Shopping vouchers should be provided to women who breastfeed for the first six months after the birth of their child</u>                                            | ++                 | =             |                              |                                | +++                        |                                                  | ++                        |
| <u>A breast pump costing around £40 should be available for free on the NHS, to help women to continue breastfeeding.</u>                                              | ++                 |               | =                            | ++ (Grade E)                   |                            |                                                  | ++                        |
| <u>Local health services should receive additional funding if they reach targets for the number of women who prove that they have stopped smoking during pregnancy</u> | +++                |               | =                            | - (Grade C1)                   |                            |                                                  |                           |
| <u>Local health services should receive additional funding if they reach targets for the number of women who reach targets for the number of women who breastfeed</u>  | ++                 |               |                              |                                | +++                        |                                                  |                           |

*Odds Ratios (OR) for agreement: + represents  $1.0 \leq OR < 1.5$ ; ++ represents  $1.5 \leq OR < 2.0$ ; +++ represents  $OR \geq 2.0$ ; - represents  $0.5 \leq OR < 1.0$ .*



**Table 4. Highest acceptable value of shopping voucher for women who stop smoking during pregnancy or are breastfeeding**

| Value | Smoking in pregnancy |         | Breastfeeding        |         |
|-------|----------------------|---------|----------------------|---------|
|       | Number<br>(N = 660*) | Percent | Number<br>(N = 697*) | Percent |
| £2    | 116                  | 17.6    | 146                  | 20.95   |
| £10   | 146                  | 22.1    | 150                  | 21.52   |
| £20   | 193                  | 29.2    | 199                  | 28.55   |
| £40   | 115                  | 17.4    | 110                  | 15.78   |
| £60   | 36                   | 5.5     | 36                   | 5.16    |
| £80   | 54                   | 8.2     | 56                   | 8.03    |

\* Respondents from the 1144 [UK-British](#) public participants who strongly agreed, agreed or neither agreed nor disagreed with shopping vouchers incentives

For peer review only

1  
2  
3  
4  
5  
6  
7  
8  
9  
10  
11  
12  
13  
14  
15  
16  
17  
18  
19  
20  
21  
22  
23  
24  
25  
26  
27  
28  
29  
30  
31  
32  
33  
34  
35  
36  
37  
38  
39  
40  
41  
42  
43  
44  
45  
46  
47  
48  
49  
50  
51  
52  
53  
54  
55  
56  
57  
58  
59  
60

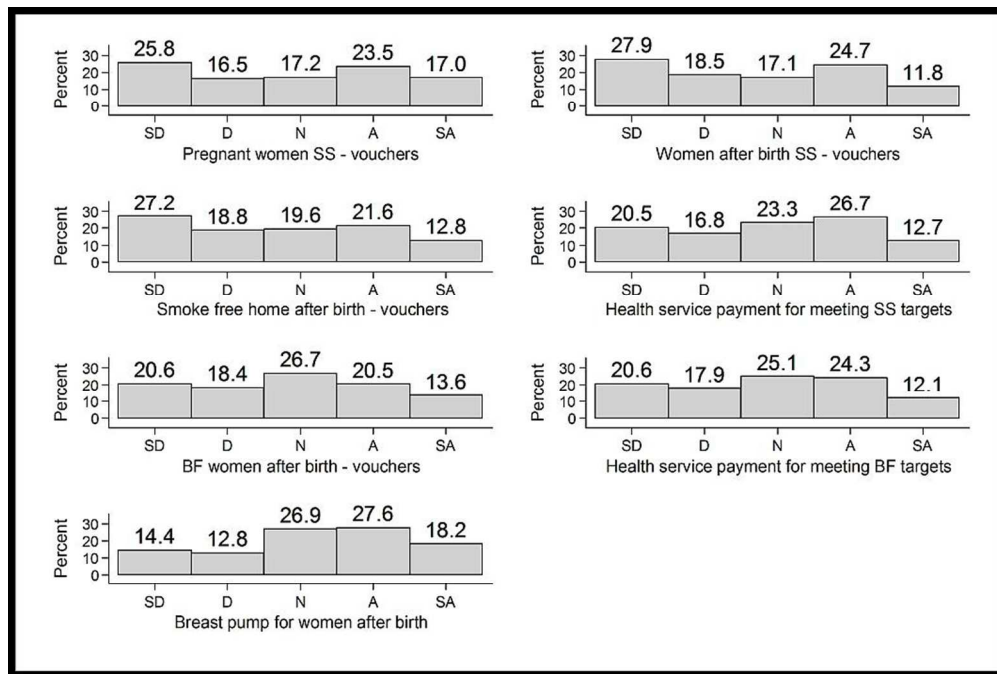

Figure 1. Bar charts of general public agreement with the shortlist of incentive strategies

Footnote:  
 SD: Strongly disagree  
 D: Disagree  
 N: Neither agree nor disagree  
 A: Agree  
 SA: Strongly agree  
 BF: Breastfeeding  
 SS: Stop smoking

90x60mm (300 x 300 DPI)

only

**WEB 1 MORI survey of the general public**LIFESTYLE SURVEY – CS MODULE CAPIBUS WEEK 12

(SAMPLE = ADULTS AGED 18+)

(COMPUTING, PLEASE ROTATE SO THAT ½ SAMPLE ARE ASKED SMOKING QUESTIONS (SMOKING INTRO PLUS CS01 – 05) FIRST AND ½ SAMPLE ARE ASKED BREASTFEEDING QUESTIONS (BREASTFEEDING INTRO PLUS CS06 – CS10) FIRST)

(COMPUTING: PLEASE ENSURE ALL DK, REF AND NULL ARE TREATED AS HIDDEN RESPONSES)

INTERVIEWER THIS SECTION DOES NOT HAVE SHOWCARDS. ON SCREEN INSTRUCTIONS WILL INDICATE WHEN TO SHOW AND WHEN NOT TO SHOW SCREEN TO THE RESPONDENT. PLEASE NOTE: THERE MAY BE QUESTIONS THAT ALLOW DON'T KNOW, NONE OF THESE OR REFUSED. PLEASE TYPE DK FOR DON'T KNOW, REF FOR REFUSED AND NULL FOR NONE OF THESE

(New Screen)

INTERVIEWER: PLEASE SHOW SCREEN UNTIL OTHERWISE INSTRUCTED.

I would now like to ask you some questions about smoking during pregnancy...

CS01. Stopping smoking in pregnancy benefits the health of the baby and the mother. Research shows that providing shopping vouchers to women who prove that they have stopped smoking during pregnancy increases the number of women who stop. While some people feel that providing vouchers is appropriate, others feel that it is wrong or unfair.

Do you agree or disagree that shopping vouchers should be provided to women who prove that they have stopped smoking during pregnancy?

(SINGLE CODE; REVERSE ORDER BETWEEN INTERVIEWS)

Strongly agree

Tend to agree

Neither agree nor disagree

Tend to disagree

Strongly disagree

IF CODE STRONGLY AGREE, TEND TO AGREE OR NEITHER AGREE NOR DISAGREE AT CS01, ASK:

CS02. What is the highest amount of shopping voucher you think it would be acceptable to provide a woman who proves that she has stopped smoking during pregnancy?

(SINGLE CODE; REVERSE ORDER BETWEEN INTERVIEWS)

A. £2 per month

B. £10 per month

C. £20 per month

D. £40 per month

E. £60 per month

F. £80 per month

IF CODE STRONGLY AGREE, TEND TO AGREE OR NEITHER AGREE NOR DISAGREE AT CS01, ASK:

CS03. Do you think that it is acceptable to provide shopping vouchers to women who prove that they have stopped smoking during pregnancy, regardless of their income, or only to women on low incomes?

(SINGLE CODE)

To all women, regardless of income

Only to women on low incomes

1  
2  
3 ASK ALL

4 CS04. Some women start smoking again after the birth of their baby, particularly if their partner or  
5 someone at home smokes. Please tell me whether you agree or disagree with each of the following  
6 statements.  
7

8 Statements:

9 It is acceptable to provide shopping vouchers to a woman for two months after the birth of her baby if  
10 she proves that she is still not smoking

11 It is acceptable to provide shopping vouchers to a woman for two months after the birth of her baby if  
12 she never lets anyone smoke in her home

13 (SINGLE CODE FOR EACH STATEMENT. REVERSE ORDER OF LIST BETWEEN  
14 INTERVIEWS.)  
15

16 Precode list:

17 Strongly agree

18 Tend to agree

19 Neither agree nor disagree

20 Tend to disagree

21 Strongly disagree  
22

23 CS05. Do you agree or disagree that local health services should receive additional funding if they  
24 reach targets for the number of women who prove that they have stopped smoking during pregnancy?  
25 (SINGLE CODE. REVERSE ORDER OF LIST BETWEEN INTERVIEWS.)  
26

27 Precode list:

28 Strongly agree

29 Tend to agree

30 Neither agree nor disagree

31 Tend to disagree

32 Strongly disagree  
33

34 I would now like to ask you some questions about breastfeeding...

35  
36 CS06. Breastfeeding benefits the health of the baby and the mother. While some people feel it is  
37 appropriate to provide shopping vouchers to encourage breastfeeding, other people feel it is wrong or  
38 unfair.

39 Do you agree or disagree that shopping vouchers should be provided to women who breastfeed for the  
40 first six months after the birth of their child?  
41 (SINGLE CODE. REVERSE ORDER OF LIST BETWEEN INTERVIEWS.)  
42

43 Precode list:

44 Strongly agree

45 Tend to agree

46 Neither agree nor disagree

47 Tend to disagree

48 Strongly disagree  
49

50 IF CODE STRONGLY AGREE, TEND TO AGREE OR NEITHER AGREE NOR DISAGREE AT  
51 CS06, ASK:

52 CS07. What is the highest amount of shopping voucher you would consider acceptable for women who  
53 breastfeed? (SINGLE CODE; REVERSE ORDER BETWEEN INTERVIEWS)  
54

- 55 A. £2 per month  
56 B. £10 per month  
57 C. £20 per month  
58 D. £40 per month  
59 E. £60 per month  
60 F. £80 per month

1  
2  
3 IF CODE STRONGLY AGREE, TEND TO AGREE OR NEITHER AGREE NOR DISAGREE AT  
4 CS06, ASK:  
5

6 CS08. Do you agree or disagree that shopping vouchers should be provided to all women who  
7 breastfeed, regardless of their income, or only to women on low incomes?  
8 (SINGLE CODE)  
9

10 To all women, regardless of income  
11 Only to women on low incomes  
12

13 ASK ALL

14 CS09. Do you agree or disagree that local health services should receive additional funding if they  
15 reach targets for the number of women who breastfeed?  
16 (SINGLE CODE. REVERSE ORDER OF LIST BETWEEN INTERVIEWS.)  
17

18 Precode list:

19 Strongly agree

20 Tend to agree

21 Neither agree nor disagree

22 Tend to disagree

23 Strongly disagree  
24

25 NEW SCREEN

26 INTERVIEWER: THE WORDING OF THE NEXT QUESTION IS A BIT SENSITIVE, ABOUT  
27 BREASTFEEDING. PLEASE COULD YOU TURN THE NEXT SCREEN TO THE RESPONDENT  
28 AND ASK THEM TO READ THE QUESTION THEMSELVES. THEY CAN JUST GIVE YOU  
29 THEIR ANSWER FOR YOU TO INPUT.  
30

31 ASK ALL

32 CS10. Some women who breastfeed like to express milk. This allows babies to receive breast milk  
33 when mother and baby are apart.

34 To express milk, some women find a breast pump useful. Women can buy breast pumps ranging from  
35 £20 to over £100. Do you agree or disagree that a breast pump costing around £40 should be available  
36 for free on the NHS, to help women to continue breastfeeding?  
37 (SINGLE CODE. REVERSE ORDER OF LIST BETWEEN INTERVIEWS.)  
38

39 Precode list:

40 Strongly agree

41 Tend to agree

42 Neither agree nor disagree

43 Tend to disagree

44 Strongly disagree  
45

46 TO FIT WITH OMNIBUS DEMOG QUESTIONS, IF NOT RECORDED ANY CHILDREN IN  
47 OMNIBUS DEMOG QUESTIONS, ASK...

48 CS11. Do you have any children? Please include any children who are grown up now, and any children  
49 who do not live with you.  
50 (SINGLE CODE)  
51

52 Yes

53 No  
54

55 IF HAVE CHILDREN (FROM OMNIBUS DEMOGS OR CS11), ASK:

56 CS12. Have any of your children ever been breastfed or received breast milk, even if only for a day or  
57 two?  
58 (SINGLE CODE, ALLOW DK AND REF)  
59

60 Yes

No

1  
2  
3 ASK ALL

4 CS13. Do you currently smoke or have you ever smoked?  
5

6 Yes, I currently smoke every day

7 Yes, I currently smoke, but not every day

8 Yes, I used to smoke but have quit

9 No, I have never smoked

10 I prefer not to answer  
11

12 IF CODE 1 OR 2 AT CS13:

13 CS14. Have you ever tried to stop smoking?

14 (SINGLE CODE)  
15

16 Yes

17 No  
18

19 CLOSE  
20  
21  
22  
23  
24  
25  
26  
27  
28  
29  
30  
31  
32  
33  
34  
35  
36  
37  
38  
39  
40  
41  
42  
43  
44  
45  
46  
47  
48  
49  
50  
51  
52  
53  
54  
55  
56  
57  
58  
59  
60

For peer review only

## Web 2. Ipsos MORI Computer Assisted Personal Interviewing (CAPI)

### background

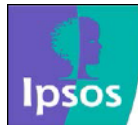

Ipsos MORI  
Global Omnibus Services

#### Background to Capibus

Ipsos MORI's weekly face-to-face omnibus, *Capibus*, is well-established; it was launched in 1992 and was the **first omnibus** of its kind to use 'computer assisted personal interviewing' (CAPI) to administer the questionnaire. This new approach instantly improved the quality and accuracy of the information collected and has become a quality standard in the omnibus industry worldwide.

*Capibus* is run every week with fieldwork lasting one week in total. The length of time allocated to complete Ipsos MORI's omnibus, combined with the *Capibus* interviewing style of completing the survey **in home** instead of the on the doorstep, or in a hall, ensures that interviewers spend time with the respondents, building a rapport. This in turn engages respondents and fundamentally improves the quality of responses.

The key advantages that *Capibus* has over other face-to-face omnibus surveys available in Britain is the high quality sample design which incorporates a range of variables to ensure a robust, representative and consistent sample is achieved on a weekly basis. Factored in to the design is the larger number of sampling points to underpin coverage, the week's fieldwork allocated to the interviewing period and the interviewing style. Our demographics are also designed to enhance any research required by both our public and private sector clients - to do this we are pleased to be able to offer a comprehensive list of more than 30 demographics free of charge.

*Capibus* therefore provides you with **considerable flexibility** and means that we have no problem whatsoever in running tracker questions when required nor ad hoc needs as and when they may potentially arise.

#### The Sample

*Capibus* uses a unique and rigorous sampling method - a controlled form of random location sampling (known as 'random locale', a dual stage sampling design). Ipsos MORI uses a control method applied to field region and sub-region over a robust number of sample points (typically 155-180) to ensure we get a good geographical spread. We then set our interviewer quotas for sex, age, working status and tenure to ensure our sample is nationally representative - we use the CACI ACORN geo-demographic system in the selection process.

The use of ACORN ensures all types of area are fully represented and that selection of respondents is largely taken out of the hands of the interviewers, helping to eliminate any possible bias in the sample caused by interviewing people all with the same background.

On Ipsos MORI Face-to-Face Omnibus the interviewer is required to achieve interviews with respondents from a small set of homogenous streets, selected with probability proportional to population after stratification by ACORN characteristics and region

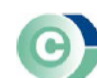



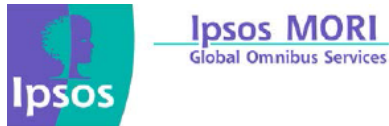

Because the sampling process is repeated every week, the Capibus sample is matched wave on wave, making it ideal for taking successive measurements on the same issue so there should be no concerns about running questions over a number of weeks.

Ipsos MORI's reputation has largely been built on our high-profile political and other opinion research over several decades. We have a strong image among the public, the media and other key opinion formers for conducting rigorous, independent research to high standards. As a result, we do believe that the Ipsos MORI name adds value to the research projects we conduct and assists significantly in maximising response rates and in the publication and dissemination of findings.

### Quality Plan

There are dozens of quality issues which make the difference between robust and unreliable data. These will have a direct impact on your ability to make the right decisions with confidence and to maximise the value of the resources you invest in the research you have in mind.

Ipsos MORI can guarantee securing robust data because we have to undergo stringent independent audits of our quality systems. As a result, we have a proven record on **quality and industry leadership** in this area. Our clients tell us that this is what sets us apart from other agencies and this is upheld by our record in terms of independent assessments.

MRS Company Partnership - In 2005 we were the first market research company to sign our organisation up to the rigours of the Market Research Society (MRS) Code. With the increasing importance of self-regulation, we wanted to be at the forefront of supporting the ethics and quality of our industry by applying the industry's professional Code to our entire organisation including all our interviewers. Previous to this, the Code applied solely to individuals who are members.

There are now over 350 MRS company partners who have followed our lead.

In 1996, MORI became **one of just two** companies to achieve accreditation under MRQSA (Market Research Quality Standards Association). This sets out minimum standards for each stage of a market research project and is designed to enable accredited companies to provide a superior service to their clients. We have passed a series of inspections since then with flying colours.

We are also a member of the Market Research Society and ESOMAR (the European Society for Opinion and Marketing Research), and as such, adhere to their Codes of Conduct.

Ipsos MORI was the **first company in the world** to gain ISO 20252:2006 accreditation - the international market research specific standard that supersedes BS 7911 / MRQSA and incorporates IQCS (Interviewer Quality Control Scheme); it covers the five stages of a Market Research project.

ISO 27001:2005 - International standard for information security designed to ensure the selection of adequate and proportionate security controls. Ipsos MORI was the **first research company in the UK** to be awarded this in August 2008.

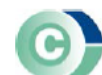



## Web 3

The data was weighted to correct for the minor differences between the achieved sample and the target sample. A 'rim weighting' system was used to provide the 'best weighting', or least distorting, by using a weighting matrix to run a large number of solutions from which the best is chosen. Thus 'Rim weighting' is superior to the more common system of 'Cell weighting'. The data required minimal weighting and the differences between the unweighted and weighted sample are shown in the Table 3.1 below.

Table 3.1. Weighted and unweighted sample characteristics

|                                  |                                                 | COUNTS      |             |             |             |
|----------------------------------|-------------------------------------------------|-------------|-------------|-------------|-------------|
|                                  |                                                 | UNWEIGHTED  | WEIGHTED    | UNWEIGHTED  | WEIGHTED    |
| <b>SEX</b>                       | SEX                                             |             |             |             |             |
|                                  | <b>BASE</b>                                     | <b>1144</b> | <b>1164</b> | <b>1144</b> | <b>1164</b> |
|                                  | MALE                                            | 540         | 542         | 47%         | 47%         |
|                                  | FEMALE                                          | 604         | 622         | 53%         | 53%         |
| <b>AGE</b>                       | AGE                                             |             |             |             |             |
|                                  | <b>BASE</b>                                     | <b>1144</b> | <b>1164</b> | <b>1144</b> | <b>1164</b> |
|                                  | 15 - 17                                         | -           | -           | -           | -           |
|                                  | 18 - 24                                         | 170         | 179         | 15%         | 15%         |
|                                  | 25 - 34                                         | 175         | 193         | 15%         | 17%         |
|                                  | 35 - 44                                         | 181         | 207         | 16%         | 18%         |
|                                  | 45 - 54                                         | 159         | 174         | 14%         | 15%         |
|                                  | 55 - 64                                         | 166         | 157         | 15%         | 14%         |
| 65+                              | 293                                             | 253         | 26%         | 22%         |             |
| <b>GOVERNMENT OFFICE REGION</b>  | <b>BASE</b>                                     | <b>1144</b> | <b>1164</b> | <b>1144</b> | <b>1164</b> |
|                                  | EAST MIDLANDS                                   | 80          | 91          | 7%          | 8%          |
|                                  | EASTERN                                         | 78          | 89          | 7%          | 8%          |
|                                  | LONDON                                          | 162         | 162         | 14%         | 14%         |
|                                  | NORTH EAST                                      | 57          | 49          | 5%          | 4%          |
|                                  | NORTH WEST                                      | 156         | 113         | 14%         | 10%         |
|                                  | SCOTLAND                                        | 109         | 105         | 10%         | 9%          |
|                                  | SOUTH EAST                                      | 137         | 151         | 12%         | 13%         |
|                                  | SOUTH WEST                                      | 94          | 126         | 8%          | 11%         |
|                                  | WALES                                           | 66          | 63          | 6%          | 5%          |
|                                  | WEST MIDLANDS                                   | 95          | 107         | 8%          | 9%          |
| YORKS AND HUMBR                  | 110                                             | 107         | 10%         | 9%          |             |
| <b>WORKING STATUS RESPONDENT</b> | WORKING STATUS RESPONDENT                       |             |             |             |             |
|                                  | <b>BASE</b>                                     | <b>1144</b> | <b>1164</b> | <b>1144</b> | <b>1164</b> |
|                                  | HAVE PAID JOB - FULL TIME (30+ HOURS PER WEEK)  | 354         | 430         | 31%         | 37%         |
|                                  | HAVE PAID JOB - PART TIME (8-29 HOURS PER WEEK) | 111         | 131         | 10%         | 11%         |

|  |                                                             |             |             |             |             |
|--|-------------------------------------------------------------|-------------|-------------|-------------|-------------|
|  | HAVE PAID JOB - PART TIME (UNDER 8 HOURS PER WEEK)          | 11          | 14          | 1%          | 1%          |
|  | SELF-EMPLOYED                                               | 49          | 60          | 4%          | 5%          |
|  | FULL TIME STUDENT                                           | 83          | 75          | 7%          | 6%          |
|  | STILL AT SCHOOL                                             | -           | -           | -           | -           |
|  | UNEMPLOYED AND SEEKING WORK                                 | 74          | 56          | 6%          | 5%          |
|  | RETIRED                                                     | 339         | 287         | 30%         | 25%         |
|  | NOT IN PAID WORK FOR OTHER REASON                           | 25          | 22          | 2%          | 2%          |
|  | NOT IN PAID WORK BECAUSE OF LONG TERM ILLNESS OR DISABILITY | 36          | 27          | 3%          | 2%          |
|  | NOT WORKING - HOUSEWIFE                                     | 62          | 62          | 5%          | 5%          |
|  | TENURE                                                      |             |             |             |             |
|  | <b>BASE</b>                                                 | <b>1144</b> | <b>1164</b> | <b>1144</b> | <b>1164</b> |
|  | BEING BOUGHT ON A MORTGAGE                                  | 260         | 374         | 23%         | 32%         |
|  | OWNED OUTRIGHT BY HOUSEHOLD                                 | 426         | 398         | 37%         | 34%         |
|  | RENTED FROM LOCAL AUTHORITY                                 | 138         | 87          | 12%         | 7%          |
|  | RENTED FROM A PRIVATE LANDLORD                              | 230         | 239         | 20%         | 21%         |
|  | BELONGS TO HOUSING ASSOCIATION                              | 83          | 57          | 7%          | 5%          |
|  | OTHER                                                       | 2           | 3           | *           | *           |
|  | OWNED NET                                                   | 686         | 773         | 60%         | 66%         |
|  | RENTED NET                                                  | 451         | 383         | 39%         | 33%         |
|  | REFUSED                                                     | 5           | 5           | *           | *           |
|  | ETHNICITY                                                   |             |             |             |             |
|  | <b>BASE</b>                                                 | <b>1144</b> | <b>1164</b> | <b>1144</b> | <b>1164</b> |
|  | WHITE                                                       | 985         | 1032        | 86%         | 89%         |
|  | NON- WHITE                                                  | 151         | 121         | 13%         | 10%         |

**Web 4 Framing effects in the MORI survey**

| Variable                                            | Topic covered first     | SD            | D               | N             | A             | SA            |
|-----------------------------------------------------|-------------------------|---------------|-----------------|---------------|---------------|---------------|
| Pregnant women<br>SC – vouchers                     | Smoking                 | 154<br>(26.3) | 94<br>(16.0)    | 103<br>(17.6) | 131<br>(22.4) | 104<br>(17.7) |
|                                                     | Breastfeeding           | 141<br>(25.3) | 95<br>(17.0)    | 94<br>(16.8)  | 138<br>(24.7) | 90<br>(16.1)  |
|                                                     | OR (95% CI) p<br>value  | 1.00          | (0.82,<br>1.23) | 0.98          |               |               |
| Women after birth<br>SC – vouchers                  | Smoking                 | 167<br>(28.5) | 113<br>(19.3)   | 98<br>(16.7)  | 135<br>(23.0) | 73<br>(12.5)  |
|                                                     | Breastfeeding           | 152<br>(27.2) | 99<br>(17.7)    | 98<br>(17.6)  | 147<br>(26.3) | 62<br>(11.1)  |
|                                                     | OR (95% CI; p<br>value) | 1.06          | (0.86,<br>1.31) | 0.57          |               |               |
| Smoke free home<br>after birth –<br>vouchers        | Smoking                 | 162<br>(27.6) | 113<br>(19.3)   | 113<br>(19.3) | 121<br>(20.6) | 77<br>(13.1)  |
|                                                     | Breastfeeding           | 149<br>(26.7) | 102<br>(18.3)   | 111<br>(19.9) | 126<br>(22.6) | 70<br>(12.5)  |
|                                                     | OR (95% CI; p<br>value) | 1.05          | (0.85,<br>1.29) | 0.65          |               |               |
| Health service<br>payment for<br>meeting SC targets | Smoking                 | 127<br>(21.7) | 95<br>(16.2)    | 130<br>(22.2) | 155<br>(26.5) | 79<br>(13.5)  |
|                                                     | Breastfeeding           | 107<br>(19.2) | 97<br>(17.4)    | 137<br>(24.6) | 151<br>(27.1) | 66<br>(11.8)  |
|                                                     | OR (95% CI; p<br>value) | 1.01          | (0.82,<br>1.24) | 0.93          |               |               |
| BF women after                                      | Smoking                 | 152           | 134             | 138           | 99            | 63            |

| Variable                                      | Topic                | SD     | D            | N      | A      | SA     |
|-----------------------------------------------|----------------------|--------|--------------|--------|--------|--------|
|                                               | <b>covered first</b> |        |              |        |        |        |
| birth – vouchers                              |                      | (25.9) | (22.9)       | (23.5) | (16.9) | (10.8) |
|                                               | Breastfeeding        | 84     | 77           | 168    | 136    | 93     |
|                                               |                      | (15.1) | (13.8)       | (30.1) | (24.4) | (16.7) |
|                                               | OR (95% CI; p value) | 2.00   | (1.61, 2.46) | <0.001 |        |        |
| Health service payment for meeting BF targets | Smoking              | 145    | 113          | 134    | 125    | 69     |
|                                               |                      | (24.7) | (19.3)       | (22.9) | (21.3) | (11.8) |
|                                               | Breastfeeding        | 91     | 92           | 153    | 153    | 69     |
|                                               |                      | (16.3) | (16.5)       | (27.4) | (27.4) | (12.4) |
|                                               | OR (95% CI; p value) | 1.44   | (1.17, 1.77) | 0.001  |        |        |
| Breast pumps                                  | Smoking              | 105    | 76           | 150    | 157    | 98     |
|                                               |                      | (17.9) | (13.0)       | (25.6) | (26.8) | (16.7) |
|                                               | Breastfeeding        | 60     | 71           | 158    | 159    | 110    |
|                                               |                      | (10.8) | (12.7)       | (28.3) | (28.5) | (19.7) |
|                                               | OR (95% CI; p value) | 1.32   | (1.08, 1.62) | 0.008  |        |        |

*Note: An odds ratio >1 indicates that respondents asked the about breastfeeding incentive first were more likely to agree than respondents asked about smoking cessation incentives first.*

*SC = smoking cessation; BF = breastfeeding*

## Web 5. Detailed results tables

**Table 1** Response to “Shopping vouchers for women who prove that they have stopped smoking during pregnancy” by independent variables

| Variable                          | SD         | D          | N          | A          | SA         |
|-----------------------------------|------------|------------|------------|------------|------------|
| <b>Age category</b>               |            |            |            |            |            |
| 18 – 24                           | 30 (17.6)  | 34 (20.0)  | 34 (20.0)  | 48 (28.2)  | 24 (14.1)  |
| 25 – 34                           | 32 (18.3)  | 32 (18.3)  | 27 (15.4)  | 50 (28.6)  | 34 (19.4)  |
| 35 – 44                           | 31 (17.1)  | 29 (16.0)  | 33 (18.2)  | 46 (25.4)  | 42 (23.2)  |
| 45 – 54                           | 44 (27.7)  | 28 (17.6)  | 29 (18.2)  | 32 (20.1)  | 26 (16.4)  |
| 55 – 59                           | 23 (31.9)  | 13 (18.1)  | 12 (16.7)  | 16 (22.2)  | 8 (11.1)   |
| 60 – 64                           | 28 (29.8)  | 13 (13.8)  | 13 (13.8)  | 24 (25.5)  | 16 (17.0)  |
| 65+                               | 107 (36.5) | 40 (13.7)  | 49 (16.7)  | 53 (18.1)  | 44 (15.0)  |
| <b>Breastfeeding</b>              |            |            |            |            |            |
| Children not breastfed            | 154 (24.4) | 113 (17.9) | 135 (21.4) | 138 (21.8) | 92 (14.6)  |
| Children breastfed                | 141 (27.5) | 76 (14.8)  | 62 (12.1)  | 131 (25.6) | 102 (19.9) |
| <b>Children</b>                   |            |            |            |            |            |
| No children                       | 90 (22.4)  | 79 (19.7)  | 81 (20.1)  | 98 (24.4)  | 54 (13.4)  |
| Have children                     | 205 (27.6) | 110 (14.8) | 116 (15.6) | 171 (23.0) | 140 (18.9) |
| <b>Ethnicity</b>                  |            |            |            |            |            |
| White                             | 280 (28.4) | 163 (16.5) | 167 (17.0) | 212 (21.5) | 163 (16.5) |
| Other ethnicity                   | 15 (9.4)   | 26 (16.4)  | 30 (18.9)  | 57 (35.8)  | 31 (19.5)  |
| <b>Sex</b>                        |            |            |            |            |            |
| Male                              | 120 (22.2) | 83 (15.4)  | 106 (19.6) | 128 (23.7) | 103 (19.1) |
| Female                            | 175 (29.0) | 106 (17.5) | 91 (15.1)  | 141 (23.3) | 91 (15.1)  |
| <b>Education</b>                  |            |            |            |            |            |
| University                        | 65 (22.0)  | 46 (15.6)  | 44 (14.9)  | 77 (26.1)  | 63 (21.4)  |
| GCSE                              | 98 (28.7)  | 54 (15.8)  | 57 (16.7)  | 80 (23.4)  | 53 (15.5)  |
| A-level                           | 48 (24.9)  | 43 (22.3)  | 32 (16.6)  | 36 (18.7)  | 34 (17.6)  |
| No Formal qualification           | 59 (29.9)  | 24 (12.2)  | 47 (23.9)  | 45 (22.8)  | 22 (11.2)  |
| Other, still studying, don't know | 25 (21.4)  | 22 (18.8)  | 17 (14.5)  | 31 (26.5)  | 22 (18.8)  |

| Variable                     | SD         | D          | N         | A          | SA        |
|------------------------------|------------|------------|-----------|------------|-----------|
| <b>Social Grade</b>          |            |            |           |            |           |
| AB                           | 71 (29.7)  | 37 (15.5)  | 30 (12.6) | 59 (24.7)  | 42 (17.6) |
| C1                           | 103 (27.8) | 67 (18.1)  | 68 (18.4) | 73 (19.7)  | 59 (15.9) |
| C2                           | 57 (24.2)  | 38 (16.1)  | 44 (18.6) | 55 (23.3)  | 42 (17.8) |
| D                            | 40 (24.7)  | 29 (17.9)  | 28 (17.3) | 38 (23.5)  | 27 (16.7) |
| E                            | 24 (17.5)  | 18 (13.1)  | 27 (19.7) | 44 (32.1)  | 24 (17.5) |
| <b>Smoking Status</b>        |            |            |           |            |           |
| Never smoked                 | 147 (25.7) | 102 (17.8) | 97 (16.9) | 144 (25.1) | 83 (14.5) |
| Previous smoker              | 84 (29.9)  | 49 (17.4)  | 43 (15.3) | 64 (22.8)  | 41 (14.6) |
| Current (tried quitting)     | 38 (21.7)  | 22 (12.6)  | 31 (17.7) | 34 (19.4)  | 50 (28.6) |
| Current (not tried quitting) | 15 (23.8)  | 9 (14.3)   | 10 (15.9) | 16 (25.4)  | 13 (20.6) |
| Refused to answer            | 11 (21.2)  | 7 (13.5)   | 16 (30.8) | 11 (21.2)  | 7 (13.5)  |
| <b>Area</b>                  |            |            |           |            |           |
| North                        | 24 (31.2)  | 17 (22.1)  | 11 (14.3) | 10 (13.0)  | 15 (19.5) |
| North West                   | 19 (13.4)  | 25 (17.6)  | 38 (26.8) | 41 (28.9)  | 19 (13.4) |
| Yorks Hum                    | 40 (38.5)  | 11 (10.6)  | 13 (12.5) | 22 (21.2)  | 18 (17.3) |
| East Midlands                | 25 (22.9)  | 28 (25.7)  | 14 (12.8) | 29 (26.6)  | 13 (11.9) |
| West Midlands                | 22 (33.3)  | 10 (15.2)  | 12 (18.2) | 12 (18.2)  | 10 (15.2) |
| East Anglia                  | 10 (24.4)  | 6 (14.6)   | 5 (12.2)  | 10 (24.4)  | 10 (24.4) |
| South East                   | 20 (24.7)  | 9 (11.1)   | 17 (21.0) | 15 (18.5)  | 20 (24.7) |
| South West                   | 55 (27.5)  | 26 (13.0)  | 40 (20.0) | 47 (23.5)  | 32 (16.0) |
| London                       | 17 (11.4)  | 31 (20.8)  | 19 (12.8) | 59 (39.6)  | 23 (15.4) |
| Wales                        | 29 (43.9)  | 9 (13.6)   | 6 (9.1)   | 10 (15.2)  | 12 (18.2) |
| Scotland                     | 34 (31.2)  | 17 (15.6)  | 22 (20.2) | 14 (12.8)  | 22 (20.2) |

*SD = strongly disagree, D = disagree, N = neither agree nor disagree, A = agree, SA = strongly agree; cells are number (row percentages).*

**Table 2** Simple univariable and multiple ordered logit regression models for response to “Shopping vouchers for women who prove that they have stopped smoking during pregnancy”

| Variable                          | Simple regression model |              |         | Multiple regression model |              |         |
|-----------------------------------|-------------------------|--------------|---------|---------------------------|--------------|---------|
|                                   | OR                      | 95% CI       | P value | OR                        | 95% CI       | P value |
| <b>Age category</b>               |                         |              |         |                           |              |         |
| 18 - 24                           | 1.66                    | (1.19, 2.31) | 0.003   | 1.67                      | (1.10, 2.54) | 0.016   |
| 25 - 34                           | 1.92                    | (1.37, 2.69) | < 0.001 | 1.71                      | (1.17, 2.49) | 0.006   |
| 35 - 44                           | 2.15                    | (1.54, 3.00) | < 0.001 | 1.88                      | (1.30, 2.72) | 0.001   |
| 45 - 54                           | 1.29                    | (0.91, 1.82) | 0.16    | 1.27                      | (0.87, 1.84) | 0.21    |
| 55 - 59                           | 1.04                    | (0.66, 1.65) | 0.87    | 1.03                      | (0.63, 1.66) | 0.91    |
| 60 - 64                           | 1.39                    | (0.91, 2.12) | 0.13    | 1.42                      | (0.92, 2.20) | 0.12    |
| <b>Breastfeeding</b>              |                         |              |         |                           |              |         |
| Children breastfed                | 1.15                    | (0.94, 1.42) | 0.18    | 1.26                      | (0.94, 1.69) | 0.12    |
| <b>Children</b>                   |                         |              |         |                           |              |         |
| Have children                     | 1.05                    | (0.85, 1.30) | 0.67    | 1.17                      | (0.86, 1.59) | 0.33    |
| <b>Ethnicity</b>                  |                         |              |         |                           |              |         |
| Other ethnicity                   | 1.94                    | (1.46, 2.59) | < 0.001 | 1.42                      | (1.01, 1.99) | 0.047   |
| <b>Sex</b>                        |                         |              |         |                           |              |         |
| Female                            | 0.75                    | (0.61, 0.92) | 0.006   | 0.71                      | (0.57, 0.88) | 0.002   |
| <b>Education</b>                  |                         |              |         |                           |              |         |
| GCSE                              | 0.70                    | (0.53, 0.93) | 0.014   | 0.59                      | (0.43, 0.81) | 0.001   |
| A-level                           | 0.72                    | (0.52, 0.99) | 0.042   | 0.63                      | (0.44, 0.90) | 0.010   |
| No Formal qualification           | 0.64                    | (0.46, 0.87) | 0.005   | 0.63                      | (0.42, 0.95) | 0.029   |
| Other, still studying, don't know | 0.92                    | (0.63, 1.34) | 0.66    | 0.84                      | (0.55, 1.28) | 0.41    |
| <b>Social Grade</b>               |                         |              |         |                           |              |         |
| C1                                | 0.92                    | (0.68, 1.23) | 0.57    | 1.03                      | (0.75, 1.42) | 0.87    |

| Variable                     | Simple regression model |              |         | Multiple regression model |              |         |
|------------------------------|-------------------------|--------------|---------|---------------------------|--------------|---------|
|                              | OR                      | 95% CI       | P value | OR                        | 95% CI       | P value |
| C2                           | 1.12                    | (0.81, 1.55) | 0.48    | 1.25                      | (0.85, 1.83) | 0.26    |
| D                            | 1.06                    | (0.74, 1.51) | 0.75    | 1.27                      | (0.83, 1.94) | 0.27    |
| E                            | 1.48                    | (1.03, 2.15) | 0.036   | 1.74                      | (1.12, 2.70) | 0.014   |
| <b>Smoking Status</b>        |                         |              |         |                           |              |         |
| Previous smoker              | 0.88                    | (0.68, 1.13) | 0.32    | 0.97                      | (0.74, 1.28) | 0.83    |
| Current (tried quitting)     | 1.59                    | (1.17, 2.16) | 0.003   | 1.63                      | (1.18, 2.26) | 0.003   |
| Current (not tried quitting) | 1.28                    | (0.80, 2.04) | 0.30    | 1.31                      | (0.81, 2.12) | 0.28    |
| Refused to answer            | 1.08                    | (0.66, 1.74) | 0.77    | 0.93                      | (0.56, 1.55) | 0.78    |
| <b>Area</b>                  |                         |              |         |                           |              |         |
| North                        | 0.50                    | (0.30, 0.81) | 0.005   | 0.66                      | (0.39, 1.10) | 0.11    |
| North West                   | 0.82                    | (0.56, 1.21) | 0.33    | 1.03                      | (0.69, 1.56) | 0.87    |
| Yorks Hum                    | 0.49                    | (0.31, 0.76) | 0.002   | 0.62                      | (0.38, 1.01) | 0.054   |
| East Midlands                | 0.58                    | (0.38, 0.89) | 0.012   | 0.70                      | (0.45, 1.09) | 0.12    |
| West Midlands                | 0.49                    | (0.29, 0.81) | 0.006   | 0.68                      | (0.39, 1.16) | 0.16    |
| East Anglia                  | 0.86                    | (0.46, 1.60) | 0.63    | 1.06                      | (0.56, 2.01) | 0.86    |
| South East                   | 0.82                    | (0.51, 1.33) | 0.42    | 1.26                      | (0.75, 2.11) | 0.38    |
| South West                   | 0.63                    | (0.44, 0.92) | 0.015   | 0.97                      | (0.64, 1.45) | 0.86    |
| Wales                        | 0.37                    | (0.22, 0.64) | < 0.001 | 0.55                      | (0.31, 0.97) | 0.040   |
| Scotland                     | 0.54                    | (0.35, 0.84) | 0.006   | 0.78                      | (0.49, 1.26) | 0.31    |

*OR is odds ratio; CI is confidence interval; simple univariable regression models included only the categories for that variable; multiple regression include all variables. Reference categories were 65 and over (age), no children breastfed, no children, white ethnicity, male sex, university education social grade A and B combined, never smoked, and London.*



**Table 3** Responses to “Shopping vouchers for a woman for two months after the birth of her baby if she proves that she is still not smoking” broken down by independent variables

| Variable                          | SD         | D          | N          | A          | SA         |
|-----------------------------------|------------|------------|------------|------------|------------|
| <b>Age category</b>               |            |            |            |            |            |
| 18 – 24                           | 31 (18.2)  | 36 (21.2)  | 37 (21.8)  | 47 (27.6)  | 19 (11.2)  |
| 25 – 34                           | 33 (18.9)  | 41 (23.4)  | 32 (18.3)  | 46 (26.3)  | 23 (13.1)  |
| 35 – 44                           | 36 (19.9)  | 38 (21.0)  | 28 (15.5)  | 52 (28.7)  | 27 (14.9)  |
| 45 – 54                           | 44 (27.7)  | 33 (20.8)  | 26 (16.4)  | 40 (25.2)  | 16 (10.1)  |
| 55 – 59                           | 29 (40.3)  | 14 (19.4)  | 6 (8.3)    | 16 (22.2)  | 7 (9.7)    |
| 60 – 64                           | 28 (29.8)  | 12 (12.8)  | 15 (16.0)  | 25 (26.6)  | 14 (14.9)  |
| 65+                               | 118 (40.3) | 38 (13.0)  | 52 (17.7)  | 56 (19.1)  | 29 (9.9)   |
| <b>Breastfeeding</b>              |            |            |            |            |            |
| Children not breastfed            | 160 (25.3) | 123 (19.5) | 141 (22.3) | 138 (21.8) | 70 (11.1)  |
| Children breastfed                | 159 (31.1) | 89 (17.4)  | 55 (10.7)  | 144 (28.1) | 65 (12.7)  |
| <b>Children</b>                   |            |            |            |            |            |
| No children                       | 89 (22.1)  | 82 (20.4)  | 91 (22.6)  | 100 (24.9) | 40 (10.0)  |
| Have children                     | 230 (31.0) | 130 (17.5) | 105 (14.2) | 182 (24.5) | 95 (12.8)  |
| <b>Ethnicity</b>                  |            |            |            |            |            |
| White                             | 302 (30.7) | 184 (18.7) | 162 (16.4) | 227 (23.0) | 110 (11.2) |
| Other ethnicity                   | 17 (10.7)  | 28 (17.6)  | 34 (21.4)  | 55 (34.6)  | 25 (15.7)  |
| <b>Sex</b>                        |            |            |            |            |            |
| Male                              | 123 (22.8) | 97 (18.0)  | 109 (20.2) | 138 (25.6) | 73 (13.5)  |
| Female                            | 196 (32.5) | 115 (19.0) | 87 (14.4)  | 144 (23.8) | 62 (10.3)  |
| <b>Education</b>                  |            |            |            |            |            |
| University                        | 68 (23.1)  | 54 (18.3)  | 49 (16.6)  | 79 (26.8)  | 45 (15.3)  |
| GCSE                              | 102 (29.8) | 68 (19.9)  | 57 (16.7)  | 75 (21.9)  | 40 (11.7)  |
| A-level                           | 55 (28.5)  | 37 (19.2)  | 30 (15.5)  | 52 (26.9)  | 19 (9.8)   |
| No Formal qualification           | 67 (34.0)  | 29 (14.7)  | 44 (22.3)  | 43 (21.8)  | 14 (7.1)   |
| Other, still studying, don't know | 27 (23.1)  | 24 (20.5)  | 16 (13.7)  | 33 (28.2)  | 17 (14.5)  |

| Variable                     | SD         | D          | N          | A          | SA        |
|------------------------------|------------|------------|------------|------------|-----------|
| <b>Social Grade</b>          |            |            |            |            |           |
| AB                           | 71 (29.7)  | 41 (17.2)  | 36 (15.1)  | 59 (24.7)  | 32 (13.4) |
| C1                           | 110 (29.7) | 85 (23.0)  | 52 (14.1)  | 83 (22.4)  | 40 (10.8) |
| C2                           | 58 (24.6)  | 41 (17.4)  | 47 (19.9)  | 57 (24.2)  | 33 (14.0) |
| D                            | 48 (29.6)  | 26 (16.0)  | 32 (19.8)  | 42 (25.9)  | 14 (8.6)  |
| E                            | 32 (23.4)  | 19 (13.9)  | 29 (21.2)  | 41 (29.9)  | 16 (11.7) |
| <b>Smoking Status</b>        |            |            |            |            |           |
| Never smoked                 | 154 (26.9) | 110 (19.2) | 100 (17.5) | 151 (26.4) | 58 (10.1) |
| Previous smoker              | 100 (35.6) | 54 (19.2)  | 41 (14.6)  | 58 (20.6)  | 28 (10.0) |
| Current (tried quitting)     | 39 (22.3)  | 31 (17.7)  | 28 (16.0)  | 41 (23.4)  | 36 (20.6) |
| Current (not tried quitting) | 13 (20.6)  | 11 (17.5)  | 15 (23.8)  | 17 (27.0)  | 7 (11.1)  |
| Refused to answer            | 13 (25.0)  | 6 (11.5)   | 12 (23.1)  | 15 (28.8)  | 6 (11.5)  |
| <b>Area</b>                  |            |            |            |            |           |
| North                        | 24 (31.2)  | 18 (23.4)  | 11 (14.3)  | 13 (16.9)  | 11 (14.3) |
| North West                   | 21 (14.8)  | 22 (15.5)  | 40 (28.2)  | 41 (28.9)  | 18 (12.7) |
| Yorks Hum                    | 42 (40.4)  | 11 (10.6)  | 15 (14.4)  | 21 (20.2)  | 15 (14.4) |
| East Midlands                | 30 (27.5)  | 27 (24.8)  | 18 (16.5)  | 26 (23.9)  | 8 (7.3)   |
| West Midlands                | 25 (37.9)  | 14 (21.2)  | 6 (9.1)    | 16 (24.2)  | 5 (7.6)   |
| East Anglia                  | 10 (24.4)  | 7 (17.1)   | 4 (9.8)    | 11 (26.8)  | 9 (22.0)  |
| South East                   | 24 (29.6)  | 7 (8.6)    | 17 (21.0)  | 20 (24.7)  | 13 (16.0) |
| South West                   | 56 (28.0)  | 36 (18.0)  | 43 (21.5)  | 47 (23.5)  | 18 (9.0)  |
| London                       | 16 (10.7)  | 38 (25.5)  | 17 (11.4)  | 55 (36.9)  | 23 (15.4) |
| Wales                        | 29 (43.9)  | 9 (13.6)   | 5 (7.6)    | 15 (22.7)  | 8 (12.1)  |
| Scotland                     | 42 (38.5)  | 23 (21.1)  | 20 (18.3)  | 17 (15.6)  | 7 (6.4)   |

*SD = strongly disagree, D = disagree, N = neither agree nor disagree, A = agree, SA = strongly agree; cells are number (row percentages).*

**Table 4** Simple univariable and multiple ordered logit regression models for response to “Shopping vouchers for a woman for two months after the birth of her baby if she proves that she is still not smoking”

| Variable                          | Simple regression model |              |         | Multiple regression model |              |         |
|-----------------------------------|-------------------------|--------------|---------|---------------------------|--------------|---------|
|                                   | OR                      | 95% CI       | P value | OR                        | 95% CI       | P value |
| <b>Age category</b>               |                         |              |         |                           |              |         |
| 18 - 24                           | 1.89                    | (1.35, 2.64) | < 0.001 | 1.51                      | (1.00, 2.30) | 0.053   |
| 25 - 34                           | 1.88                    | (1.34, 2.62) | < 0.001 | 1.42                      | (0.97, 2.08) | 0.068   |
| 35 - 44                           | 2.04                    | (1.46, 2.85) | < 0.001 | 1.65                      | (1.14, 2.39) | 0.007   |
| 45 - 54                           | 1.42                    | (1.00, 2.01) | 0.048   | 1.26                      | (0.87, 1.84) | 0.23    |
| 55 - 59                           | 0.95                    | (0.59, 1.54) | 0.85    | 0.95                      | (0.58, 1.56) | 0.83    |
| 60 - 64                           | 1.70                    | (1.11, 2.61) | 0.015   | 1.65                      | (1.05, 2.57) | 0.028   |
| <b>Breastfeeding</b>              |                         |              |         |                           |              |         |
| Children breastfed                | 1.00                    | (0.81, 1.23) | 0.98    | 1.16                      | (0.86, 1.56) | 0.34    |
| <b>Children</b>                   |                         |              |         |                           |              |         |
| Have children                     | 0.88                    | (0.71, 1.09) | 0.24    | 1.02                      | (0.75, 1.39) | 0.90    |
| <b>Ethnicity</b>                  |                         |              |         |                           |              |         |
| Other ethnicity                   | 2.12                    | (1.59, 2.83) | < 0.001 | 1.39                      | (0.98, 1.95) | 0.062   |
| <b>Sex</b>                        |                         |              |         |                           |              |         |
| Female                            | 0.69                    | (0.56, 0.85) | 0.001   | 0.68                      | (0.55, 0.85) | 0.001   |
| <b>Education</b>                  |                         |              |         |                           |              |         |
| GCSE                              | 0.71                    | (0.53, 0.93) | 0.014   | 0.62                      | (0.45, 0.85) | 0.003   |
| A-level                           | 0.75                    | (0.55, 1.04) | 0.084   | 0.68                      | (0.48, 0.96) | 0.028   |
| No Formal qualification           | 0.60                    | (0.44, 0.83) | 0.002   | 0.64                      | (0.42, 0.96) | 0.032   |
| Other, still studying, don't know | 0.98                    | (0.67, 1.43) | 0.90    | 0.93                      | (0.61, 1.43) | 0.75    |

| Variable                     | Simple regression model |              |         | Multiple regression model |              |         |
|------------------------------|-------------------------|--------------|---------|---------------------------|--------------|---------|
|                              | OR                      | 95% CI       | P value | OR                        | 95% CI       | P value |
| <b>Social Grade</b>          |                         |              |         |                           |              |         |
| C1                           | 0.73                    | (0.56, 0.94) | 0.016   | 0.87                      | (0.66, 1.14) | 0.32    |
| C2                           | 1.45                    | (1.07, 1.97) | 0.017   | 1.64                      | (1.18, 2.27) | 0.003   |
| D                            | 1.22                    | (0.78, 1.92) | 0.38    | 1.31                      | (0.82, 2.10) | 0.26    |
| E                            | 1.22                    | (0.74, 2.01) | 0.43    | 1.18                      | (0.70, 1.99) | 0.54    |
| <b>Smoking Status</b>        |                         |              |         |                           |              |         |
| Previous smoker              | 0.85                    | (0.64, 1.14) | 0.28    | 0.94                      | (0.68, 1.29) | 0.69    |
| Current (tried quitting)     | 1.15                    | (0.83, 1.58) | 0.40    | 1.23                      | (0.84, 1.81) | 0.28    |
| Current (not tried quitting) | 0.92                    | (0.64, 1.31) | 0.64    | 1.11                      | (0.73, 1.70) | 0.62    |
| Refused to answer            | 1.25                    | (0.86, 1.81) | 0.24    | 1.37                      | (0.87, 2.15) | 0.17    |
| <b>Area</b>                  |                         |              |         |                           |              |         |
| North                        | 0.46                    | (0.28, 0.75) | 0.002   | 0.60                      | (0.36, 1.01) | 0.054   |
| North West                   | 0.84                    | (0.57, 1.25) | 0.38    | 1.02                      | (0.67, 1.55) | 0.92    |
| Yorks Hum                    | 0.42                    | (0.27, 0.67) | < 0.001 | 0.51                      | (0.31, 0.83) | 0.007   |
| East Midlands                | 0.46                    | (0.30, 0.71) | < 0.001 | 0.56                      | (0.36, 0.88) | 0.012   |
| West Midlands                | 0.36                    | (0.21, 0.61) | < 0.001 | 0.49                      | (0.28, 0.85) | 0.011   |
| East Anglia                  | 0.85                    | (0.45, 1.61) | 0.62    | 1.13                      | (0.58, 2.20) | 0.71    |
| South East                   | 0.67                    | (0.41, 1.08) | 0.10    | 1.01                      | (0.60, 1.70) | 0.97    |
| South West                   | 0.51                    | (0.35, 0.74) | < 0.001 | 0.73                      | (0.49, 1.10) | 0.14    |
| Wales                        | 0.35                    | (0.21, 0.61) | < 0.001 | 0.51                      | (0.29, 0.91) | 0.022   |
| Scotland                     | 0.31                    | (0.20, 0.49) | < 0.001 | 0.44                      | (0.28, 0.71) | 0.001   |

*OR is odds ratio; CI is confidence interval; simple univariable regression models included only the categories for that variable; multiple regression include all variables. Reference categories were 65 and over (age), no children breastfed, no children, white ethnicity, male sex, university education social grade A and B combined, never smoked, and London.*

**Table 5** Response to “Shopping vouchers for a woman for two months after the birth of her baby if she never lets anyone smoke in her home” by independent variables

| Variable                          | SD         | D          | N          | A          | SA         |
|-----------------------------------|------------|------------|------------|------------|------------|
| <b>Age category</b>               |            |            |            |            |            |
| 18 – 24                           | 27 (15.9)  | 35 (20.6)  | 43 (25.3)  | 49 (28.8)  | 16 (9.4)   |
| 25 – 34                           | 31 (17.7)  | 38 (21.7)  | 41 (23.4)  | 44 (25.1)  | 21 (12.0)  |
| 35 – 44                           | 38 (21.0)  | 37 (20.4)  | 35 (19.3)  | 41 (22.7)  | 30 (16.6)  |
| 45 – 54                           | 43 (27.0)  | 33 (20.8)  | 25 (15.7)  | 42 (26.4)  | 16 (10.1)  |
| 55 – 59                           | 30 (41.7)  | 14 (19.4)  | 6 (8.3)    | 11 (15.3)  | 11 (15.3)  |
| 60 – 64                           | 32 (34.0)  | 11 (11.7)  | 16 (17.0)  | 22 (23.4)  | 13 (13.8)  |
| 65+                               | 110 (37.5) | 47 (16.0)  | 58 (19.8)  | 38 (13.0)  | 40 (13.7)  |
| <b>Breastfeeding</b>              |            |            |            |            |            |
| Children not breastfed            | 161 (25.5) | 124 (19.6) | 146 (23.1) | 127 (20.1) | 74 (11.7)  |
| Children breastfed                | 150 (29.3) | 91 (17.8)  | 78 (15.2)  | 120 (23.4) | 73 (14.3)  |
| <b>Children</b>                   |            |            |            |            |            |
| No children                       | 90 (22.4)  | 81 (20.1)  | 94 (23.4)  | 91 (22.6)  | 46 (11.4)  |
| Have children                     | 221 (29.8) | 134 (18.1) | 130 (17.5) | 156 (21.0) | 101 (13.6) |
| <b>Ethnicity</b>                  |            |            |            |            |            |
| White                             | 296 (30.1) | 192 (19.5) | 183 (18.6) | 191 (19.4) | 123 (12.5) |
| Other ethnicity                   | 15 (9.4)   | 23 (14.5)  | 41 (25.8)  | 56 (35.2)  | 24 (15.1)  |
| <b>Sex</b>                        |            |            |            |            |            |
| Male                              | 128 (23.7) | 92 (17.0)  | 125 (23.1) | 116 (21.5) | 79 (14.6)  |
| Female                            | 183 (30.3) | 123 (20.4) | 99 (16.4)  | 131 (21.7) | 68 (11.3)  |
| <b>Education</b>                  |            |            |            |            |            |
| University                        | 66 (22.4)  | 50 (16.9)  | 58 (19.7)  | 74 (25.1)  | 47 (15.9)  |
| GCSE                              | 102 (29.8) | 62 (18.1)  | 63 (18.4)  | 75 (21.9)  | 40 (11.7)  |
| A-level                           | 55 (28.5)  | 42 (21.8)  | 40 (20.7)  | 37 (19.2)  | 19 (9.8)   |
| No Formal qualification           | 64 (32.5)  | 32 (16.2)  | 44 (22.3)  | 36 (18.3)  | 21 (10.7)  |
| Other, still studying, don't know | 24 (20.5)  | 29 (24.8)  | 19 (16.2)  | 25 (21.4)  | 20 (17.1)  |

| Variable                     | SD         | D          | N          | A          | SA        |
|------------------------------|------------|------------|------------|------------|-----------|
| <b>Social Grade</b>          |            |            |            |            |           |
| AB                           | 66 (27.6)  | 48 (20.1)  | 39 (16.3)  | 49 (20.5)  | 37 (15.5) |
| C1                           | 111 (30.0) | 81 (21.9)  | 68 (18.4)  | 73 (19.7)  | 37 (10.0) |
| C2                           | 57 (24.2)  | 41 (17.4)  | 48 (20.3)  | 56 (23.7)  | 34 (14.4) |
| D                            | 48 (29.6)  | 24 (14.8)  | 39 (24.1)  | 32 (19.8)  | 19 (11.7) |
| E                            | 29 (21.2)  | 21 (15.3)  | 30 (21.9)  | 37 (27.0)  | 20 (14.6) |
| <b>Smoking Status</b>        |            |            |            |            |           |
| Never smoked                 | 147 (25.7) | 108 (18.8) | 112 (19.5) | 142 (24.8) | 64 (11.2) |
| Previous smoker              | 100 (35.6) | 55 (19.6)  | 48 (17.1)  | 48 (17.1)  | 30 (10.7) |
| Current (tried quitting)     | 38 (21.7)  | 33 (18.9)  | 32 (18.3)  | 36 (20.6)  | 36 (20.6) |
| Current (not tried quitting) | 13 (20.6)  | 10 (15.9)  | 19 (30.2)  | 10 (15.9)  | 11 (17.5) |
| Refused to answer            | 13 (25.0)  | 9 (17.3)   | 13 (25.0)  | 11 (21.2)  | 6 (11.5)  |
| <b>Area</b>                  |            |            |            |            |           |
| North                        | 21 (27.3)  | 19 (24.7)  | 10 (13.0)  | 14 (18.2)  | 13 (16.9) |
| North West                   | 21 (14.8)  | 21 (14.8)  | 44 (31.0)  | 35 (24.6)  | 21 (14.8) |
| Yorks Hum                    | 38 (36.5)  | 15 (14.4)  | 23 (22.1)  | 14 (13.5)  | 14 (13.5) |
| East Midlands                | 29 (26.6)  | 30 (27.5)  | 22 (20.2)  | 19 (17.4)  | 9 (8.3)   |
| West Midlands                | 28 (42.4)  | 11 (16.7)  | 8 (12.1)   | 11 (16.7)  | 8 (12.1)  |
| East Anglia                  | 10 (24.4)  | 7 (17.1)   | 6 (14.6)   | 9 (22.0)   | 9 (22.0)  |
| South East                   | 23 (28.4)  | 8 (9.9)    | 18 (22.2)  | 22 (27.2)  | 10 (12.3) |
| South West                   | 54 (27.0)  | 41 (20.5)  | 47 (23.5)  | 35 (17.5)  | 23 (11.5) |
| London                       | 15 (10.1)  | 35 (23.5)  | 22 (14.8)  | 55 (36.9)  | 22 (14.8) |
| Wales                        | 29 (43.9)  | 9 (13.6)   | 6 (9.1)    | 12 (18.2)  | 10 (15.2) |
| Scotland                     | 43 (39.4)  | 19 (17.4)  | 18 (16.5)  | 21 (19.3)  | 8 (7.3)   |

*SD = strongly disagree, D = disagree, N = neither agree nor disagree, A = agree, SA = strongly agree; cells are number (row percentages).*

**Table 6** Simple univariable and multiple ordered logit regression models for response to “Shopping vouchers for a woman for two months after the birth of her baby if she never lets anyone smoke in her home”

| Variable                          | Simple regression model |              |         | Multiple regression model |              |         |
|-----------------------------------|-------------------------|--------------|---------|---------------------------|--------------|---------|
|                                   | OR                      | 95% CI       | P value | OR                        | 95% CI       | P value |
| <b>Age category</b>               |                         |              |         |                           |              |         |
| 18 - 24                           | 1.87                    | (1.34, 2.60) | < 0.001 | 1.55                      | (1.02, 2.35) | 0.040   |
| 25 - 34                           | 1.80                    | (1.29, 2.50) | 0.001   | 1.42                      | (0.97, 2.07) | 0.068   |
| 35 - 44                           | 1.83                    | (1.31, 2.56) | < 0.001 | 1.51                      | (1.04, 2.17) | 0.028   |
| 45 - 54                           | 1.40                    | (0.99, 1.98) | 0.058   | 1.26                      | (0.86, 1.83) | 0.23    |
| 55 - 59                           | 0.89                    | (0.54, 1.44) | 0.63    | 0.88                      | (0.53, 1.46) | 0.62    |
| 60 - 64                           | 1.36                    | (0.88, 2.09) | 0.16    | 1.28                      | (0.82, 2.00) | 0.28    |
| <b>Breastfeeding</b>              |                         |              |         |                           |              |         |
| Children breastfed                | 1.03                    | (0.83, 1.26) | 0.81    | 1.27                      | (0.95, 1.71) | 0.11    |
| <b>Children</b>                   |                         |              |         |                           |              |         |
| Have children                     | 0.87                    | (0.70, 1.08) | 0.21    | 0.96                      | (0.70, 1.31) | 0.78    |
| <b>Ethnicity</b>                  |                         |              |         |                           |              |         |
| Other ethnicity                   | 2.26                    | (1.70, 3.01) | < 0.001 | 1.49                      | (1.06, 2.08) | 0.021   |
| <b>Sex</b>                        |                         |              |         |                           |              |         |
| Female                            | 0.75                    | (0.61, 0.92) | 0.005   | 0.72                      | (0.58, 0.90) | 0.003   |
| <b>Education</b>                  |                         |              |         |                           |              |         |
| GCSE                              | 0.70                    | (0.53, 0.92) | 0.012   | 0.60                      | (0.44, 0.83) | 0.002   |
| A-level                           | 0.64                    | (0.47, 0.89) | 0.007   | 0.56                      | (0.39, 0.79) | 0.001   |
| No Formal qualification           | 0.62                    | (0.45, 0.86) | 0.004   | 0.66                      | (0.44, 1.00) | 0.048   |
| Other, still studying, don't know | 0.93                    | (0.64, 1.37) | 0.73    | 0.90                      | (0.59, 1.38) | 0.64    |

| Variable                     | Simple regression model |              |         | Multiple regression model |              |         |
|------------------------------|-------------------------|--------------|---------|---------------------------|--------------|---------|
|                              | OR                      | 95% CI       | P value | OR                        | 95% CI       | P value |
| <b>Social Grade</b>          |                         |              |         |                           |              |         |
| C1                           | 0.80                    | (0.60, 1.07) | 0.13    | 0.84                      | (0.61, 1.16) | 0.29    |
| C2                           | 1.15                    | (0.83, 1.59) | 0.39    | 1.22                      | (0.83, 1.79) | 0.30    |
| D                            | 0.91                    | (0.64, 1.31) | 0.62    | 1.05                      | (0.69, 1.61) | 0.81    |
| E                            | 1.33                    | (0.92, 1.93) | 0.13    | 1.37                      | (0.88, 2.15) | 0.17    |
| <b>Smoking Status</b>        |                         |              |         |                           |              |         |
| Previous smoker              | 0.67                    | (0.52, 0.87) | 0.002   | 0.79                      | (0.60, 1.04) | 0.089   |
| Current (tried quitting)     | 1.33                    | (0.98, 1.80) | 0.065   | 1.48                      | (1.08, 2.04) | 0.016   |
| Current (not tried quitting) | 1.22                    | (0.77, 1.92) | 0.40    | 1.31                      | (0.81, 2.11) | 0.27    |
| Refused to answer            | 1.00                    | (0.61, 1.64) | 0.99    | 0.95                      | (0.57, 1.59) | 0.85    |
| <b>Area</b>                  |                         |              |         |                           |              |         |
| North                        | 0.53                    | (0.32, 0.87) | 0.012   | 0.74                      | (0.44, 1.24) | 0.25    |
| North West                   | 0.84                    | (0.57, 1.25) | 0.39    | 1.06                      | (0.70, 1.60) | 0.80    |
| Yorks Hum                    | 0.40                    | (0.26, 0.63) | < 0.001 | 0.50                      | (0.31, 0.81) | 0.005   |
| East Midlands                | 0.43                    | (0.28, 0.65) | < 0.001 | 0.53                      | (0.34, 0.82) | 0.004   |
| West Midlands                | 0.32                    | (0.19, 0.55) | < 0.001 | 0.47                      | (0.27, 0.82) | 0.009   |
| East Anglia                  | 0.77                    | (0.41, 1.45) | 0.42    | 1.08                      | (0.57, 2.06) | 0.82    |
| South East                   | 0.63                    | (0.39, 1.01) | 0.057   | 1.06                      | (0.64, 1.75) | 0.84    |
| South West                   | 0.49                    | (0.34, 0.71) | < 0.001 | 0.77                      | (0.51, 1.15) | 0.20    |
| Wales                        | 0.35                    | (0.20, 0.60) | < 0.001 | 0.56                      | (0.32, 1.01) | 0.054   |
| Scotland                     | 0.33                    | (0.21, 0.52) | < 0.001 | 0.52                      | (0.32, 0.83) | 0.006   |

*OR is odds ratio; CI is confidence interval; simple univariable regression models included only the categories for that variable; multiple regression include all variables. Reference categories were 65 and over (age), no children breastfed, no children, white ethnicity, male sex, university education social grade A and B combined, never smoked, and London.*



**Table 7** Response to “Shopping vouchers for women who prove that they are breastfeeding for the first 6 months after birth” by independent variables

| Variable                          | SD         | D          | N          | A          | SA         |
|-----------------------------------|------------|------------|------------|------------|------------|
| <b>Age category</b>               |            |            |            |            |            |
| 18 – 24                           | 20 (11.8)  | 32 (18.8)  | 58 (34.1)  | 42 (24.7)  | 18 (10.6)  |
| 25 – 34                           | 23 (13.1)  | 30 (17.1)  | 45 (25.7)  | 47 (26.9)  | 30 (17.1)  |
| 35 – 44                           | 25 (13.8)  | 36 (19.9)  | 46 (25.4)  | 39 (21.5)  | 35 (19.3)  |
| 45 – 54                           | 32 (20.1)  | 34 (21.4)  | 40 (25.2)  | 34 (21.4)  | 19 (11.9)  |
| 55 – 59                           | 18 (25.0)  | 20 (27.8)  | 16 (22.2)  | 7 (9.7)    | 11 (15.3)  |
| 60 – 64                           | 31 (33.0)  | 15 (16.0)  | 19 (20.2)  | 18 (19.1)  | 11 (11.7)  |
| 65+                               | 87 (29.7)  | 44 (15.0)  | 82 (28.0)  | 48 (16.4)  | 32 (10.9)  |
| <b>Breastfeeding</b>              |            |            |            |            |            |
| Children not breastfed            | 114 (18.0) | 120 (19.0) | 216 (34.2) | 128 (20.3) | 54 (8.5)   |
| Children breastfed                | 122 (23.8) | 91 (17.8)  | 90 (17.6)  | 107 (20.9) | 102 (19.9) |
| <b>Children</b>                   |            |            |            |            |            |
| No children                       | 61 (15.2)  | 73 (18.2)  | 138 (34.3) | 93 (23.1)  | 37 (9.2)   |
| Have children                     | 175 (23.6) | 138 (18.6) | 168 (22.6) | 142 (19.1) | 119 (16.0) |
| <b>Ethnicity</b>                  |            |            |            |            |            |
| White                             | 226 (22.9) | 194 (19.7) | 265 (26.9) | 184 (18.7) | 116 (11.8) |
| Other ethnicity                   | 10 (6.3)   | 17 (10.7)  | 41 (25.8)  | 51 (32.1)  | 40 (25.2)  |
| <b>Sex</b>                        |            |            |            |            |            |
| Male                              | 93 (17.2)  | 84 (15.6)  | 180 (33.3) | 115 (21.3) | 68 (12.6)  |
| Female                            | 143 (23.7) | 127 (21.0) | 126 (20.9) | 120 (19.9) | 88 (14.6)  |
| <b>Education</b>                  |            |            |            |            |            |
| University                        | 58 (19.7)  | 59 (20.0)  | 72 (24.4)  | 61 (20.7)  | 45 (15.3)  |
| GCSE                              | 66 (19.3)  | 63 (18.4)  | 90 (26.3)  | 72 (21.1)  | 51 (14.9)  |
| A-level                           | 47 (24.4)  | 40 (20.7)  | 52 (26.9)  | 29 (15.0)  | 25 (13.0)  |
| No Formal qualification           | 43 (21.8)  | 28 (14.2)  | 66 (33.5)  | 37 (18.8)  | 23 (11.7)  |
| Other, still studying, don't know | 22 (18.8)  | 21 (17.9)  | 26 (22.2)  | 36 (30.8)  | 12 (10.3)  |

| Variable                     | SD         | D          | N          | A          | SA        |
|------------------------------|------------|------------|------------|------------|-----------|
| <b>Social Grade</b>          |            |            |            |            |           |
| AB                           | 59 (24.7)  | 40 (16.7)  | 61 (25.5)  | 45 (18.8)  | 34 (14.2) |
| C1                           | 82 (22.2)  | 86 (23.2)  | 85 (23.0)  | 74 (20.0)  | 43 (11.6) |
| C2                           | 41 (17.4)  | 40 (16.9)  | 73 (30.9)  | 50 (21.2)  | 32 (13.6) |
| D                            | 31 (19.1)  | 26 (16.0)  | 52 (32.1)  | 33 (20.4)  | 20 (12.3) |
| E                            | 23 (16.8)  | 19 (13.9)  | 35 (25.5)  | 33 (24.1)  | 27 (19.7) |
| <b>Smoking Status</b>        |            |            |            |            |           |
| Never smoked                 | 113 (19.7) | 104 (18.2) | 142 (24.8) | 139 (24.3) | 75 (13.1) |
| Previous smoker              | 70 (24.9)  | 59 (21.0)  | 72 (25.6)  | 45 (16.0)  | 35 (12.5) |
| Current (tried quitting)     | 27 (15.4)  | 33 (18.9)  | 53 (30.3)  | 26 (14.9)  | 36 (20.6) |
| Current (not tried quitting) | 14 (22.2)  | 11 (17.5)  | 19 (30.2)  | 16 (25.4)  | 3 (4.8)   |
| Refused to answer            | 12 (23.1)  | 4 (7.7)    | 20 (38.5)  | 9 (17.3)   | 7 (13.5)  |
| <b>Area</b>                  |            |            |            |            |           |
| North                        | 16 (20.8)  | 16 (20.8)  | 19 (24.7)  | 8 (10.4)   | 18 (23.4) |
| North West                   | 15 (10.6)  | 26 (18.3)  | 41 (28.9)  | 36 (25.4)  | 24 (16.9) |
| Yorks Hum                    | 28 (26.9)  | 15 (14.4)  | 32 (30.8)  | 21 (20.2)  | 8 (7.7)   |
| East Midlands                | 22 (20.2)  | 26 (23.9)  | 33 (30.3)  | 22 (20.2)  | 6 (5.5)   |
| West Midlands                | 23 (34.8)  | 14 (21.2)  | 15 (22.7)  | 7 (10.6)   | 7 (10.6)  |
| East Anglia                  | 4 (9.8)    | 11 (26.8)  | 8 (19.5)   | 10 (24.4)  | 8 (19.5)  |
| South East                   | 14 (17.3)  | 11 (13.6)  | 28 (34.6)  | 15 (18.5)  | 13 (16.0) |
| South West                   | 52 (26.0)  | 37 (18.5)  | 61 (30.5)  | 33 (16.5)  | 17 (8.5)  |
| London                       | 14 (9.4)   | 25 (16.8)  | 27 (18.1)  | 56 (37.6)  | 27 (18.1) |
| Wales                        | 23 (34.8)  | 13 (19.7)  | 10 (15.2)  | 9 (13.6)   | 11 (16.7) |
| Scotland                     | 25 (22.9)  | 17 (15.6)  | 32 (29.4)  | 18 (16.5)  | 17 (15.6) |

*SD = strongly disagree, D = disagree, N = neither agree nor disagree, A = agree, SA = strongly agree; cells are number (row percentages).*

**Table 8** Simple univariable and multiple ordered logit regression models for response to “Shopping vouchers for women who prove that they are breastfeeding for the first 6 months after birth”

| Variable                          | Simple regression model |              |         | Multiple regression model |              |         |
|-----------------------------------|-------------------------|--------------|---------|---------------------------|--------------|---------|
|                                   | OR                      | 95% CI       | P value | OR                        | 95% CI       | P value |
| <b>Age category</b>               |                         |              |         |                           |              |         |
| 18 - 24                           | 1.71                    | (1.23, 2.37) | 0.001   | 1.71                      | (1.13, 2.60) | 0.012   |
| 25 - 34                           | 2.09                    | (1.49, 2.92) | < 0.001 | 1.91                      | (1.31, 2.80) | 0.001   |
| 35 - 44                           | 1.94                    | (1.39, 2.71) | < 0.001 | 1.73                      | (1.20, 2.50) | 0.003   |
| 45 - 54                           | 1.32                    | (0.94, 1.86) | 0.11    | 1.38                      | (0.95, 2.01) | 0.090   |
| 55 - 59                           | 0.96                    | (0.60, 1.52) | 0.85    | 1.02                      | (0.63, 1.64) | 0.95    |
| 60 - 64                           | 0.94                    | (0.61, 1.44) | 0.78    | 1.01                      | (0.65, 1.59) | 0.95    |
| <b>Breastfeeding</b>              |                         |              |         |                           |              |         |
| Children breastfed                | 1.19                    | (0.96, 1.46) | 0.11    | 1.67                      | (1.24, 2.25) | 0.001   |
| <b>Children</b>                   |                         |              |         |                           |              |         |
| Have children                     | 0.90                    | (0.73, 1.11) | 0.31    | 0.80                      | (0.59, 1.08) | 0.15    |
| <b>Ethnicity</b>                  |                         |              |         |                           |              |         |
| Other ethnicity                   | 3.04                    | (2.26, 4.10) | < 0.001 | 2.03                      | (1.43, 2.88) | < 0.001 |
| <b>Sex</b>                        |                         |              |         |                           |              |         |
| Female                            | 0.80                    | (0.65, 0.99) | 0.037   | 0.77                      | (0.62, 0.95) | 0.016   |
| <b>Education</b>                  |                         |              |         |                           |              |         |
| GCSE                              | 1.03                    | (0.78, 1.36) | 0.84    | 1.01                      | (0.74, 1.40) | 0.93    |
| A-level                           | 0.76                    | (0.55, 1.04) | 0.089   | 0.71                      | (0.50, 1.02) | 0.061   |
| No Formal qualification           | 0.91                    | (0.66, 1.25) | 0.56    | 1.22                      | (0.82, 1.82) | 0.33    |
| Other, still studying, don't know | 1.07                    | (0.74, 1.57) | 0.71    | 1.10                      | (0.72, 1.67) | 0.67    |

| Variable                     | Simple regression model |              |         | Multiple regression model |              |         |
|------------------------------|-------------------------|--------------|---------|---------------------------|--------------|---------|
|                              | OR                      | 95% CI       | P value | OR                        | 95% CI       | P value |
| <b>Social Grade</b>          |                         |              |         |                           |              |         |
| C1                           | 0.93                    | (0.70, 1.25) | 0.63    | 0.84                      | (0.61, 1.16) | 0.29    |
| C2                           | 1.23                    | (0.90, 1.70) | 0.20    | 0.96                      | (0.66, 1.40) | 0.83    |
| D                            | 1.14                    | (0.80, 1.63) | 0.46    | 0.92                      | (0.60, 1.40) | 0.69    |
| E                            | 1.62                    | (1.11, 2.37) | 0.012   | 1.21                      | (0.77, 1.89) | 0.41    |
| <b>Smoking Status</b>        |                         |              |         |                           |              |         |
| Previous smoker              | 0.73                    | (0.56, 0.94) | 0.014   | 0.89                      | (0.67, 1.17) | 0.40    |
| Current (tried quitting)     | 1.17                    | (0.87, 1.58) | 0.31    | 1.17                      | (0.85, 1.61) | 0.34    |
| Current (not tried quitting) | 0.78                    | (0.50, 1.23) | 0.29    | 0.75                      | (0.47, 1.19) | 0.22    |
| Refused to answer            | 0.97                    | (0.59, 1.59) | 0.89    | 0.91                      | (0.55, 1.51) | 0.71    |
| <b>Area</b>                  |                         |              |         |                           |              |         |
| North                        | 0.53                    | (0.32, 0.88) | 0.014   | 0.79                      | (0.47, 1.35) | 0.39    |
| North West                   | 0.76                    | (0.51, 1.13) | 0.18    | 1.01                      | (0.66, 1.55) | 0.95    |
| Yorks Hum                    | 0.38                    | (0.25, 0.60) | < 0.001 | 0.56                      | (0.35, 0.90) | 0.016   |
| East Midlands                | 0.38                    | (0.25, 0.59) | < 0.001 | 0.46                      | (0.29, 0.71) | < 0.001 |
| West Midlands                | 0.25                    | (0.15, 0.42) | < 0.001 | 0.40                      | (0.23, 0.69) | 0.001   |
| East Anglia                  | 0.73                    | (0.40, 1.35) | 0.32    | 0.98                      | (0.52, 1.85) | 0.94    |
| South East                   | 0.60                    | (0.38, 0.97) | 0.039   | 1.01                      | (0.61, 1.69) | 0.96    |
| South West                   | 0.36                    | (0.25, 0.52) | < 0.001 | 0.62                      | (0.41, 0.93) | 0.021   |
| Wales                        | 0.30                    | (0.18, 0.52) | < 0.001 | 0.53                      | (0.30, 0.94) | 0.029   |
| Scotland                     | 0.48                    | (0.31, 0.75) | 0.001   | 0.84                      | (0.52, 1.36) | 0.47    |

*OR is odds ratio; CI is confidence interval; simple univariable regression models included only the categories for that variable; multiple regression include all variables. Reference categories were 65 and over (age), no children breastfed, no children, white ethnicity, male sex, university education social grade A and B combined, never smoked, and London.*

**Table 9** Response to “A breast pump costing around £40 provided for free on the NHS” by independent variables

| Variable                          | SD         | D          | N          | A          | SA         |
|-----------------------------------|------------|------------|------------|------------|------------|
| <b>Age category</b>               |            |            |            |            |            |
| 18 – 24                           | 10 (5.9)   | 21 (12.4)  | 58 (34.1)  | 52 (30.6)  | 29 (17.1)  |
| 25 – 34                           | 18 (10.3)  | 17 (9.7)   | 48 (27.4)  | 57 (32.6)  | 35 (20.0)  |
| 35 – 44                           | 22 (12.2)  | 24 (13.3)  | 37 (20.4)  | 57 (31.5)  | 41 (22.7)  |
| 45 – 54                           | 27 (17.0)  | 24 (15.1)  | 34 (21.4)  | 44 (27.7)  | 30 (18.9)  |
| 55 – 59                           | 10 (13.9)  | 13 (18.1)  | 19 (26.4)  | 22 (30.6)  | 8 (11.1)   |
| 60 – 64                           | 22 (23.4)  | 10 (10.6)  | 23 (24.5)  | 21 (22.3)  | 18 (19.1)  |
| 65+                               | 56 (19.1)  | 38 (13.0)  | 89 (30.4)  | 63 (21.5)  | 47 (16.0)  |
| <b>Breastfeeding</b>              |            |            |            |            |            |
| Children not breastfed            | 93 (14.7)  | 79 (12.5)  | 210 (33.2) | 164 (25.9) | 86 (13.6)  |
| Children breastfed                | 72 (14.1)  | 68 (13.3)  | 98 (19.1)  | 152 (29.7) | 122 (23.8) |
| <b>Children</b>                   |            |            |            |            |            |
| No children                       | 49 (12.2)  | 50 (12.4)  | 132 (32.8) | 119 (29.6) | 52 (12.9)  |
| Have children                     | 116 (15.6) | 97 (13.1)  | 176 (23.7) | 197 (26.5) | 156 (21.0) |
| <b>Ethnicity</b>                  |            |            |            |            |            |
| White                             | 158 (16.0) | 132 (13.4) | 252 (25.6) | 265 (26.9) | 178 (18.1) |
| Other ethnicity                   | 7 (4.4)    | 15 (9.4)   | 56 (35.2)  | 51 (32.1)  | 30 (18.9)  |
| <b>Sex</b>                        |            |            |            |            |            |
| Male                              | 70 (13.0)  | 62 (11.5)  | 174 (32.2) | 142 (26.3) | 92 (17.0)  |
| Female                            | 95 (15.7)  | 85 (14.1)  | 134 (22.2) | 174 (28.8) | 116 (19.2) |
| <b>Education</b>                  |            |            |            |            |            |
| University                        | 31 (10.5)  | 36 (12.2)  | 75 (25.4)  | 87 (29.5)  | 66 (22.4)  |
| GCSE                              | 54 (15.8)  | 40 (11.7)  | 98 (28.7)  | 89 (26.0)  | 61 (17.8)  |
| A-level                           | 30 (15.5)  | 25 (13.0)  | 51 (26.4)  | 49 (25.4)  | 38 (19.7)  |
| No Formal qualification           | 36 (18.3)  | 29 (14.7)  | 56 (28.4)  | 51 (25.9)  | 25 (12.7)  |
| Other, still studying, don't know | 14 (12.0)  | 17 (14.5)  | 28 (23.9)  | 40 (34.2)  | 18 (15.4)  |

| Variable                     | SD        | D         | N          | A          | SA        |
|------------------------------|-----------|-----------|------------|------------|-----------|
| <b>Social Grade</b>          |           |           |            |            |           |
| AB                           | 36 (15.1) | 32 (13.4) | 55 (23.0)  | 59 (24.7)  | 57 (23.8) |
| C1                           | 57 (15.4) | 58 (15.7) | 98 (26.5)  | 99 (26.8)  | 58 (15.7) |
| C2                           | 33 (14.0) | 23 (9.7)  | 76 (32.2)  | 71 (30.1)  | 33 (14.0) |
| D                            | 26 (16.0) | 20 (12.3) | 43 (26.5)  | 44 (27.2)  | 29 (17.9) |
| E                            | 13 (9.5)  | 14 (10.2) | 36 (26.3)  | 43 (31.4)  | 31 (22.6) |
| <b>Smoking Status</b>        |           |           |            |            |           |
| Never smoked                 | 71 (12.4) | 68 (11.9) | 167 (29.1) | 173 (30.2) | 94 (16.4) |
| Previous smoker              | 50 (17.8) | 43 (15.3) | 64 (22.8)  | 76 (27.0)  | 48 (17.1) |
| Current (tried quitting)     | 27 (15.4) | 22 (12.6) | 40 (22.9)  | 38 (21.7)  | 48 (27.4) |
| Current (not tried quitting) | 8 (12.7)  | 7 (11.1)  | 17 (27.0)  | 19 (30.2)  | 12 (19.0) |
| Refused to answer            | 9 (17.3)  | 7 (13.5)  | 20 (38.5)  | 10 (19.2)  | 6 (11.5)  |
| <b>Area</b>                  |           |           |            |            |           |
| North                        | 14 (18.2) | 11 (14.3) | 13 (16.9)  | 21 (27.3)  | 18 (23.4) |
| North West                   | 7 (4.9)   | 14 (9.9)  | 46 (32.4)  | 49 (34.5)  | 26 (18.3) |
| Yorks Hum                    | 21 (20.2) | 3 (2.9)   | 25 (24.0)  | 28 (26.9)  | 27 (26.0) |
| East Midlands                | 18 (16.5) | 28 (25.7) | 32 (29.4)  | 20 (18.3)  | 11 (10.1) |
| West Midlands                | 9 (13.6)  | 12 (18.2) | 13 (19.7)  | 21 (31.8)  | 11 (16.7) |
| East Anglia                  | 5 (12.2)  | 6 (14.6)  | 10 (24.4)  | 13 (31.7)  | 7 (17.1)  |
| South East                   | 5 (6.2)   | 8 (9.9)   | 26 (32.1)  | 20 (24.7)  | 22 (27.2) |
| South West                   | 36 (18.0) | 23 (11.5) | 70 (35.0)  | 39 (19.5)  | 32 (16.0) |
| London                       | 7 (4.7)   | 15 (10.1) | 37 (24.8)  | 68 (45.6)  | 22 (14.8) |
| Wales                        | 21 (31.8) | 13 (19.7) | 7 (10.6)   | 13 (19.7)  | 12 (18.2) |
| Scotland                     | 22 (20.2) | 14 (12.8) | 29 (26.6)  | 24 (22.0)  | 20 (18.3) |

*SD = strongly disagree, D = disagree, N = neither agree not disagree, A = agree, SA = strongly agree; cells are number (row percentages).*

**Table 10** Simple univariable and multiple ordered logit regression models for response to “A breast pump costing around £40 provided for free on the NHS”

| Variable                          | Simple regression model |              |         | Multiple regression model |              |         |
|-----------------------------------|-------------------------|--------------|---------|---------------------------|--------------|---------|
|                                   | OR                      | 95% CI       | P value | OR                        | 95% CI       | P value |
| <b>Age category</b>               |                         |              |         |                           |              |         |
| 18 - 24                           | 1.60                    | (1.15, 2.22) | 0.005   | 1.74                      | (1.14, 2.63) | 0.010   |
| 25 - 34                           | 1.73                    | (1.24, 2.41) | 0.001   | 1.63                      | (1.11, 2.37) | 0.012   |
| 35 - 44                           | 1.72                    | (1.23, 2.40) | 0.002   | 1.57                      | (1.08, 2.27) | 0.017   |
| 45 - 54                           | 1.24                    | (0.88, 1.76) | 0.22    | 1.22                      | (0.84, 1.78) | 0.30    |
| 55 - 59                           | 1.06                    | (0.68, 1.67) | 0.79    | 0.92                      | (0.57, 1.48) | 0.74    |
| 60 - 64                           | 1.04                    | (0.68, 1.59) | 0.87    | 0.90                      | (0.58, 1.41) | 0.65    |
| <b>Breastfeeding</b>              |                         |              |         |                           |              |         |
| Children breastfed                | 1.49                    | (1.21, 1.84) | < 0.001 | 1.84                      | (1.36, 2.49) | < 0.001 |
| <b>Children</b>                   |                         |              |         |                           |              |         |
| Have children                     | 1.13                    | (0.91, 1.39) | 0.27    | 0.95                      | (0.70, 1.30) | 0.75    |
| <b>Ethnicity</b>                  |                         |              |         |                           |              |         |
| Other ethnicity                   | 1.46                    | (1.10, 1.95) | 0.009   | 1.07                      | (0.76, 1.51) | 0.70    |
| <b>Sex</b>                        |                         |              |         |                           |              |         |
| Female                            | 1.02                    | (0.83, 1.26) | 0.84    | 0.95                      | (0.77, 1.18) | 0.66    |
| <b>Education</b>                  |                         |              |         |                           |              |         |
| GCSE                              | 0.73                    | (0.55, 0.97) | 0.028   | 0.70                      | (0.51, 0.96) | 0.026   |
| A-level                           | 0.76                    | (0.55, 1.05) | 0.099   | 0.73                      | (0.52, 1.04) | 0.085   |
| No Formal qualification           | 0.57                    | (0.41, 0.78) | 0.001   | 0.62                      | (0.41, 0.93) | 0.020   |
| Other, still studying, don't know | 0.82                    | (0.56, 1.19) | 0.29    | 0.87                      | (0.57, 1.33) | 0.53    |

| <b>Social Grade</b>          |      |              |         |      |              |         |
|------------------------------|------|--------------|---------|------|--------------|---------|
| C1                           | 0.77 | (0.57, 1.03) | 0.076   | 0.84 | (0.61, 1.15) | 0.28    |
| C2                           | 0.86 | (0.62, 1.18) | 0.34    | 0.92 | (0.63, 1.34) | 0.67    |
| D                            | 0.85 | (0.59, 1.22) | 0.38    | 1.02 | (0.67, 1.55) | 0.93    |
| E                            | 1.25 | (0.86, 1.82) | 0.24    | 1.57 | (1.00, 2.46) | 0.050   |
| <b>Smoking Status</b>        |      |              |         |      |              |         |
| Previous smoker              | 0.82 | (0.64, 1.06) | 0.14    | 0.93 | (0.71, 1.23) | 0.62    |
| Current (tried quitting)     | 1.16 | (0.85, 1.59) | 0.35    | 1.13 | (0.81, 1.57) | 0.47    |
| Current (not tried quitting) | 1.09 | (0.69, 1.73) | 0.71    | 1.25 | (0.78, 2.01) | 0.36    |
| Refused to answer            | 0.64 | (0.39, 1.05) | 0.076   | 0.67 | (0.41, 1.12) | 0.12    |
| <b>Area</b>                  |      |              |         |      |              |         |
| North                        | 0.71 | (0.43, 1.18) | 0.19    | 0.86 | (0.51, 1.45) | 0.56    |
| North West                   | 0.93 | (0.63, 1.38) | 0.73    | 1.15 | (0.77, 1.74) | 0.49    |
| Yorks Hum                    | 0.87 | (0.56, 1.37) | 0.55    | 1.05 | (0.65, 1.70) | 0.84    |
| East Midlands                | 0.36 | (0.24, 0.55) | < 0.001 | 0.41 | (0.26, 0.64) | < 0.001 |
| West Midlands                | 0.65 | (0.39, 1.08) | 0.096   | 0.81 | (0.47, 1.41) | 0.46    |
| East Anglia                  | 0.71 | (0.39, 1.30) | 0.26    | 0.78 | (0.42, 1.48) | 0.45    |
| South East                   | 1.04 | (0.65, 1.68) | 0.86    | 1.40 | (0.85, 2.31) | 0.19    |
| South West                   | 0.51 | (0.35, 0.73) | < 0.001 | 0.68 | (0.45, 1.02) | 0.065   |
| Wales                        | 0.32 | (0.19, 0.55) | < 0.001 | 0.44 | (0.25, 0.79) | 0.006   |
| Scotland                     | 0.53 | (0.34, 0.82) | 0.004   | 0.73 | (0.45, 1.18) | 0.20    |

*OR is odds ratio; CI is confidence interval; simple univariable regression models included only the categories for that variable; multiple regression include all variables. Reference categories were 65 and over (age), no children breastfed, no children, white ethnicity, male sex, university education social grade A and B combined, never smoked, and London.*



**Table 11** Response to “Additional funding for local health services if they reach targets for the number of women who prove that they have stopped smoking during pregnancy” by independent variables

| Variable                          | SD         | D          | N          | A          | SA         |
|-----------------------------------|------------|------------|------------|------------|------------|
| <b>Age category</b>               |            |            |            |            |            |
| 18 – 24                           | 19 (11.2)  | 29 (17.1)  | 40 (23.5)  | 61 (35.9)  | 21 (12.4)  |
| 25 – 34                           | 22 (12.6)  | 32 (18.3)  | 42 (24.0)  | 57 (32.6)  | 22 (12.6)  |
| 35 – 44                           | 23 (12.7)  | 32 (17.7)  | 43 (23.8)  | 56 (30.9)  | 27 (14.9)  |
| 45 – 54                           | 32 (20.1)  | 28 (17.6)  | 40 (25.2)  | 35 (22.0)  | 24 (15.1)  |
| 55 – 59                           | 17 (23.6)  | 15 (20.8)  | 10 (13.9)  | 20 (27.8)  | 10 (13.9)  |
| 60 – 64                           | 29 (30.9)  | 10 (10.6)  | 22 (23.4)  | 24 (25.5)  | 9 (9.6)    |
| 65+                               | 92 (31.4)  | 46 (15.7)  | 70 (23.9)  | 53 (18.1)  | 32 (10.9)  |
| <b>Breastfeeding</b>              |            |            |            |            |            |
| Children not breastfed            | 125 (19.8) | 111 (17.6) | 151 (23.9) | 168 (26.6) | 77 (12.2)  |
| Children breastfed                | 109 (21.3) | 81 (15.8)  | 116 (22.7) | 138 (27.0) | 68 (13.3)  |
| <b>Children</b>                   |            |            |            |            |            |
| No children                       | 75 (18.7)  | 66 (16.4)  | 97 (24.1)  | 117 (29.1) | 47 (11.7)  |
| Have children                     | 159 (21.4) | 126 (17.0) | 170 (22.9) | 189 (25.5) | 98 (13.2)  |
| <b>Ethnicity</b>                  |            |            |            |            |            |
| White                             | 224 (22.7) | 169 (17.2) | 223 (22.6) | 248 (25.2) | 121 (12.3) |
| Other ethnicity                   | 10 (6.3)   | 23 (14.5)  | 44 (27.7)  | 58 (36.5)  | 24 (15.1)  |
| <b>Sex</b>                        |            |            |            |            |            |
| Male                              | 101 (18.7) | 91 (16.9)  | 130 (24.1) | 149 (27.6) | 69 (12.8)  |
| Female                            | 133 (22.0) | 101 (16.7) | 137 (22.7) | 157 (26.0) | 76 (12.6)  |
| <b>Education</b>                  |            |            |            |            |            |
| University                        | 51 (17.3)  | 45 (15.3)  | 68 (23.1)  | 87 (29.5)  | 44 (14.9)  |
| GCSE                              | 75 (21.9)  | 59 (17.3)  | 83 (24.3)  | 86 (25.1)  | 39 (11.4)  |
| A-level                           | 39 (20.2)  | 41 (21.2)  | 39 (20.2)  | 48 (24.9)  | 26 (13.5)  |
| No Formal qualification           | 48 (24.4)  | 28 (14.2)  | 50 (25.4)  | 51 (25.9)  | 20 (10.2)  |
| Other, still studying, don't know | 21 (17.9)  | 19 (16.2)  | 27 (23.1)  | 34 (29.1)  | 16 (13.7)  |

| Variable                     | SD         | D         | N          | A          | SA        |
|------------------------------|------------|-----------|------------|------------|-----------|
| <b>Social Grade</b>          |            |           |            |            |           |
| AB                           | 50 (20.9)  | 34 (14.2) | 51 (21.3)  | 70 (29.3)  | 34 (14.2) |
| C1                           | 88 (23.8)  | 76 (20.5) | 76 (20.5)  | 91 (24.6)  | 39 (10.5) |
| C2                           | 41 (17.4)  | 42 (17.8) | 59 (25.0)  | 62 (26.3)  | 32 (13.6) |
| D                            | 29 (17.9)  | 23 (14.2) | 44 (27.2)  | 42 (25.9)  | 24 (14.8) |
| E                            | 26 (19.0)  | 17 (12.4) | 37 (27.0)  | 41 (29.9)  | 16 (11.7) |
| <b>Smoking Status</b>        |            |           |            |            |           |
| Never smoked                 | 104 (18.2) | 99 (17.3) | 135 (23.6) | 167 (29.1) | 68 (11.9) |
| Previous smoker              | 75 (26.7)  | 48 (17.1) | 66 (23.5)  | 62 (22.1)  | 30 (10.7) |
| Current (tried quitting)     | 32 (18.3)  | 27 (15.4) | 37 (21.1)  | 43 (24.6)  | 36 (20.6) |
| Current (not tried quitting) | 13 (20.6)  | 13 (20.6) | 14 (22.2)  | 16 (25.4)  | 7 (11.1)  |
| Refused to answer            | 10 (19.2)  | 5 (9.6)   | 15 (28.8)  | 18 (34.6)  | 4 (7.7)   |
| <b>Area</b>                  |            |           |            |            |           |
| North                        | 19 (24.7)  | 18 (23.4) | 11 (14.3)  | 17 (22.1)  | 12 (15.6) |
| North West                   | 15 (10.6)  | 26 (18.3) | 42 (29.6)  | 42 (29.6)  | 17 (12.0) |
| Yorks Hum                    | 30 (28.8)  | 11 (10.6) | 20 (19.2)  | 26 (25.0)  | 17 (16.3) |
| East Midlands                | 24 (22.0)  | 24 (22.0) | 25 (22.9)  | 28 (25.7)  | 8 (7.3)   |
| West Midlands                | 19 (28.8)  | 9 (13.6)  | 15 (22.7)  | 17 (25.8)  | 6 (9.1)   |
| East Anglia                  | 10 (24.4)  | 6 (14.6)  | 8 (19.5)   | 9 (22.0)   | 8 (19.5)  |
| South East                   | 9 (11.1)   | 8 (9.9)   | 25 (30.9)  | 23 (28.4)  | 16 (19.8) |
| South West                   | 53 (26.5)  | 35 (17.5) | 56 (28.0)  | 43 (21.5)  | 13 (6.5)  |
| London                       | 8 (5.4)    | 25 (16.8) | 34 (22.8)  | 59 (39.6)  | 23 (15.4) |
| Wales                        | 20 (30.3)  | 7 (10.6)  | 9 (13.6)   | 17 (25.8)  | 13 (19.7) |
| Scotland                     | 27 (24.8)  | 23 (21.1) | 22 (20.2)  | 25 (22.9)  | 12 (11.0) |

*SD = strongly disagree, D = disagree, N = neither agree nor disagree, A = agree, SA = strongly agree; cells are number (row percentages).*

**Table 12** Simple univariable and multiple ordered logit regression models for response to “Additional funding for local health services if they reach targets for the number of women who prove that they have stopped smoking during pregnancy”

| Variable                          | Simple regression model |              |         | Multiple regression model |              |         |
|-----------------------------------|-------------------------|--------------|---------|---------------------------|--------------|---------|
|                                   | OR                      | 95% CI       | P value | OR                        | 95% CI       | P value |
| <b>Age category</b>               |                         |              |         |                           |              |         |
| 18 - 24                           | 2.24                    | (1.60, 3.14) | < 0.001 | 2.28                      | (1.50, 3.49) | < 0.001 |
| 25 - 34                           | 2.05                    | (1.47, 2.86) | < 0.001 | 1.83                      | (1.26, 2.67) | 0.002   |
| 35 - 44                           | 2.15                    | (1.54, 3.00) | < 0.001 | 1.90                      | (1.32, 2.74) | 0.001   |
| 45 - 54                           | 1.58                    | (1.11, 2.23) | 0.010   | 1.57                      | (1.08, 2.28) | 0.017   |
| 55 - 59                           | 1.46                    | (0.91, 2.35) | 0.11    | 1.43                      | (0.87, 2.34) | 0.16    |
| 60 - 64                           | 1.18                    | (0.77, 1.80) | 0.44    | 1.05                      | (0.68, 1.63) | 0.82    |
| <b>Breastfeeding</b>              |                         |              |         |                           |              |         |
| Children breastfed                | 1.02                    | (0.83, 1.26) | 0.83    | 1.12                      | (0.83, 1.50) | 0.45    |
| <b>Children</b>                   |                         |              |         |                           |              |         |
| Have children                     | 0.92                    | (0.74, 1.13) | 0.42    | 1.08                      | (0.79, 1.49) | 0.62    |
| <b>Ethnicity</b>                  |                         |              |         |                           |              |         |
| Other ethnicity                   | 1.91                    | (1.43, 2.56) | < 0.001 | 1.27                      | (0.90, 1.79) | 0.18    |
| <b>Sex</b>                        |                         |              |         |                           |              |         |
| Female                            | 0.90                    | (0.73, 1.10) | 0.30    | 0.85                      | (0.69, 1.06) | 0.16    |
| <b>Education</b>                  |                         |              |         |                           |              |         |
| GCSE                              | 0.74                    | (0.56, 0.97) | 0.030   | 0.71                      | (0.51, 0.97) | 0.033   |
| A-level                           | 0.77                    | (0.56, 1.06) | 0.11    | 0.68                      | (0.48, 0.97) | 0.032   |
| No Formal qualification           | 0.70                    | (0.51, 0.97) | 0.032   | 0.90                      | (0.60, 1.35) | 0.60    |
| Other, still studying, don't know | 0.93                    | (0.64, 1.36) | 0.71    | 1.12                      | (0.73, 1.70) | 0.60    |

| Variable                     | Simple regression model |              |         | Multiple regression model |              |         |
|------------------------------|-------------------------|--------------|---------|---------------------------|--------------|---------|
|                              | OR                      | 95% CI       | P value | OR                        | 95% CI       | P value |
| <b>Social Grade</b>          |                         |              |         |                           |              |         |
| C1                           | 0.72                    | (0.54, 0.96) | 0.025   | 0.68                      | (0.50, 0.94) | 0.019   |
| C2                           | 0.97                    | (0.70, 1.34) | 0.86    | 0.88                      | (0.60, 1.28) | 0.49    |
| D                            | 1.03                    | (0.72, 1.47) | 0.85    | 0.97                      | (0.64, 1.47) | 0.88    |
| E                            | 1.00                    | (0.69, 1.46) | 0.99    | 0.94                      | (0.60, 1.47) | 0.78    |
| <b>Smoking Status</b>        |                         |              |         |                           |              |         |
| Previous smoker              | 0.70                    | (0.54, 0.90) | 0.006   | 0.86                      | (0.65, 1.13) | 0.27    |
| Current (tried quitting)     | 1.24                    | (0.91, 1.68) | 0.18    | 1.26                      | (0.91, 1.75) | 0.16    |
| Current (not tried quitting) | 0.83                    | (0.53, 1.32) | 0.44    | 0.87                      | (0.54, 1.41) | 0.58    |
| Refused to answer            | 1.04                    | (0.63, 1.69) | 0.89    | 0.96                      | (0.57, 1.59) | 0.86    |
| <b>Area</b>                  |                         |              |         |                           |              |         |
| North                        | 0.45                    | (0.27, 0.73) | 0.001   | 0.57                      | (0.34, 0.96) | 0.036   |
| North West                   | 0.68                    | (0.46, 1.01) | 0.058   | 0.83                      | (0.55, 1.27) | 0.39    |
| Yorks Hum                    | 0.51                    | (0.32, 0.81) | 0.004   | 0.60                      | (0.37, 0.98) | 0.040   |
| East Midlands                | 0.42                    | (0.27, 0.64) | < 0.001 | 0.47                      | (0.30, 0.74) | 0.001   |
| West Midlands                | 0.40                    | (0.24, 0.68) | 0.001   | 0.56                      | (0.32, 0.96) | 0.037   |
| East Anglia                  | 0.57                    | (0.30, 1.08) | 0.086   | 0.72                      | (0.37, 1.39) | 0.33    |
| South East                   | 0.93                    | (0.58, 1.48) | 0.75    | 1.42                      | (0.86, 2.35) | 0.17    |
| South West                   | 0.36                    | (0.25, 0.52) | < 0.001 | 0.53                      | (0.35, 0.80) | 0.002   |
| Wales                        | 0.56                    | (0.32, 0.96) | 0.035   | 0.81                      | (0.46, 1.45) | 0.48    |
| Scotland                     | 0.41                    | (0.27, 0.64) | < 0.001 | 0.55                      | (0.34, 0.88) | 0.014   |

*OR is odds ratio; CI is confidence interval; simple univariable regression models included only the categories for that variable; multiple regression include all variables. Reference categories were 65 and over (age), no children breastfed, no children, white ethnicity, male sex, university education social grade A and B combined, never smoked, and London.*

**Table 13** Response to “Additional funding for local health services if they reach targets for the number of women who prove that they are breastfeeding” by independent variables

| Variable                          | SD         | D          | N          | A          | SA         |
|-----------------------------------|------------|------------|------------|------------|------------|
| <b>Age category</b>               |            |            |            |            |            |
| 18 – 24                           | 19 (11.2)  | 33 (19.4)  | 46 (27.1)  | 56 (32.9)  | 16 (9.4)   |
| 25 – 34                           | 22 (12.6)  | 27 (15.4)  | 55 (31.4)  | 49 (28.0)  | 22 (12.6)  |
| 35 – 44                           | 25 (13.8)  | 35 (19.3)  | 37 (20.4)  | 52 (28.7)  | 32 (17.7)  |
| 45 – 54                           | 32 (20.1)  | 32 (20.1)  | 39 (24.5)  | 36 (22.6)  | 20 (12.6)  |
| 55 – 59                           | 18 (25.0)  | 16 (22.2)  | 12 (16.7)  | 17 (23.6)  | 9 (12.5)   |
| 60 – 64                           | 34 (36.2)  | 14 (14.9)  | 21 (22.3)  | 15 (16.0)  | 10 (10.6)  |
| 65+                               | 86 (29.4)  | 48 (16.4)  | 77 (26.3)  | 53 (18.1)  | 29 (9.9)   |
| <b>Breastfeeding</b>              |            |            |            |            |            |
| Children not breastfed            | 117 (18.5) | 115 (18.2) | 192 (30.4) | 146 (23.1) | 62 (9.8)   |
| Children breastfed                | 119 (23.2) | 90 (17.6)  | 95 (18.6)  | 132 (25.8) | 76 (14.8)  |
| <b>Children</b>                   |            |            |            |            |            |
| No children                       | 63 (15.7)  | 72 (17.9)  | 123 (30.6) | 107 (26.6) | 37 (9.2)   |
| Have children                     | 173 (23.3) | 133 (17.9) | 164 (22.1) | 171 (23.0) | 101 (13.6) |
| <b>Ethnicity</b>                  |            |            |            |            |            |
| White                             | 229 (23.2) | 189 (19.2) | 249 (25.3) | 214 (21.7) | 104 (10.6) |
| Other ethnicity                   | 7 (4.4)    | 16 (10.1)  | 38 (23.9)  | 64 (40.3)  | 34 (21.4)  |
| <b>Sex</b>                        |            |            |            |            |            |
| Male                              | 97 (18.0)  | 85 (15.7)  | 163 (30.2) | 131 (24.3) | 64 (11.9)  |
| Female                            | 139 (23.0) | 120 (19.9) | 124 (20.5) | 147 (24.3) | 74 (12.3)  |
| <b>Education</b>                  |            |            |            |            |            |
| University                        | 58 (19.7)  | 52 (17.6)  | 70 (23.7)  | 79 (26.8)  | 36 (12.2)  |
| GCSE                              | 69 (20.2)  | 65 (19.0)  | 89 (26.0)  | 79 (23.1)  | 40 (11.7)  |
| A-level                           | 47 (24.4)  | 29 (15.0)  | 49 (25.4)  | 43 (22.3)  | 25 (13.0)  |
| No Formal qualification           | 42 (21.3)  | 34 (17.3)  | 58 (29.4)  | 41 (20.8)  | 22 (11.2)  |
| Other, still studying, don't know | 20 (17.1)  | 25 (21.4)  | 21 (17.9)  | 36 (30.8)  | 15 (12.8)  |

| Variable                     | SD         | D         | N          | A          | SA        |
|------------------------------|------------|-----------|------------|------------|-----------|
| <b>Social Grade</b>          |            |           |            |            |           |
| AB                           | 54 (22.6)  | 40 (16.7) | 59 (24.7)  | 53 (22.2)  | 33 (13.8) |
| C1                           | 84 (22.7)  | 73 (19.7) | 91 (24.6)  | 89 (24.1)  | 33 (8.9)  |
| C2                           | 46 (19.5)  | 37 (15.7) | 71 (30.1)  | 55 (23.3)  | 27 (11.4) |
| D                            | 27 (16.7)  | 29 (17.9) | 37 (22.8)  | 44 (27.2)  | 25 (15.4) |
| E                            | 25 (18.2)  | 26 (19.0) | 29 (21.2)  | 37 (27.0)  | 20 (14.6) |
| <b>Smoking Status</b>        |            |           |            |            |           |
| Never smoked                 | 108 (18.8) | 99 (17.3) | 137 (23.9) | 166 (29.0) | 63 (11.0) |
| Previous smoker              | 73 (26.0)  | 57 (20.3) | 70 (24.9)  | 52 (18.5)  | 29 (10.3) |
| Current (tried quitting)     | 32 (18.3)  | 31 (17.7) | 48 (27.4)  | 29 (16.6)  | 35 (20.0) |
| Current (not tried quitting) | 12 (19.0)  | 13 (20.6) | 17 (27.0)  | 15 (23.8)  | 6 (9.5)   |
| Refused to answer            | 11 (21.2)  | 5 (9.6)   | 15 (28.8)  | 16 (30.8)  | 5 (9.6)   |
| <b>Area</b>                  |            |           |            |            |           |
| North                        | 14 (18.2)  | 21 (27.3) | 17 (22.1)  | 15 (19.5)  | 10 (13.0) |
| North West                   | 17 (12.0)  | 26 (18.3) | 44 (31.0)  | 35 (24.6)  | 20 (14.1) |
| Yorks Hum                    | 25 (24.0)  | 15 (14.4) | 26 (25.0)  | 24 (23.1)  | 14 (13.5) |
| East Midlands                | 21 (19.3)  | 21 (19.3) | 31 (28.4)  | 30 (27.5)  | 6 (5.5)   |
| West Midlands                | 17 (25.8)  | 15 (22.7) | 16 (24.2)  | 14 (21.2)  | 4 (6.1)   |
| East Anglia                  | 6 (14.6)   | 7 (17.1)  | 7 (17.1)   | 10 (24.4)  | 11 (26.8) |
| South East                   | 15 (18.5)  | 8 (9.9)   | 23 (28.4)  | 23 (28.4)  | 12 (14.8) |
| South West                   | 56 (28.0)  | 33 (16.5) | 61 (30.5)  | 32 (16.0)  | 18 (9.0)  |
| London                       | 13 (8.7)   | 26 (17.4) | 26 (17.4)  | 65 (43.6)  | 19 (12.8) |
| Wales                        | 20 (30.3)  | 11 (16.7) | 14 (21.2)  | 10 (15.2)  | 11 (16.7) |
| Scotland                     | 32 (29.4)  | 22 (20.2) | 22 (20.2)  | 20 (18.3)  | 13 (11.9) |

*SD = strongly disagree, D = disagree, N = neither agree nor disagree, A = agree, SA = strongly agree; cells are number (row percentages).*

**Table 14** Simple univariable and multiple ordered logit regression models for response to “Additional funding for local health services if they reach targets for the number of women who prove that they are breastfeeding”

| Variable                          | Simple regression model |              |         | Multiple regression model |              |         |
|-----------------------------------|-------------------------|--------------|---------|---------------------------|--------------|---------|
|                                   | OR                      | 95% CI       | P value | OR                        | 95% CI       | P value |
| <b>Age category</b>               |                         |              |         |                           |              |         |
| 18 - 24                           | 1.90                    | (1.36, 2.64) | < 0.001 | 1.63                      | (1.07, 2.49) | 0.022   |
| 25 - 34                           | 1.96                    | (1.41, 2.72) | < 0.001 | 1.64                      | (1.13, 2.38) | 0.010   |
| 35 - 44                           | 2.14                    | (1.53, 3.00) | < 0.001 | 1.91                      | (1.32, 2.76) | 0.001   |
| 45 - 54                           | 1.41                    | (1.00, 1.99) | 0.051   | 1.38                      | (0.95, 2.00) | 0.088   |
| 55 - 59                           | 1.21                    | (0.76, 1.94) | 0.43    | 1.23                      | (0.76, 2.01) | 0.40    |
| 60 - 64                           | 0.81                    | (0.53, 1.25) | 0.34    | 0.79                      | (0.50, 1.23) | 0.30    |
| <b>Breastfeeding</b>              |                         |              |         |                           |              |         |
| Children breastfed                | 1.07                    | (0.87, 1.32) | 0.54    | 1.20                      | (0.89, 1.61) | 0.24    |
| <b>Children</b>                   |                         |              |         |                           |              |         |
| Have children                     | 0.88                    | (0.71, 1.09) | 0.23    | 0.97                      | (0.71, 1.33) | 0.86    |
| <b>Ethnicity</b>                  |                         |              |         |                           |              |         |
| Other ethnicity                   | 3.23                    | (2.40, 4.35) | < 0.001 | 2.31                      | (1.63, 3.29) | < 0.001 |
| <b>Sex</b>                        |                         |              |         |                           |              |         |
| Female                            | 0.84                    | (0.68, 1.03) | 0.099   | 0.85                      | (0.69, 1.06) | 0.15    |
| <b>Education</b>                  |                         |              |         |                           |              |         |
| GCSE                              | 0.90                    | (0.68, 1.19) | 0.47    | 0.92                      | (0.67, 1.25) | 0.58    |
| A-level                           | 0.87                    | (0.63, 1.21) | 0.41    | 0.86                      | (0.61, 1.22) | 0.40    |
| No Formal qualification           | 0.85                    | (0.62, 1.18) | 0.33    | 1.13                      | (0.76, 1.67) | 0.56    |
| Other, still studying, don't know | 1.10                    | (0.75, 1.61) | 0.62    | 1.24                      | (0.81, 1.89) | 0.32    |

| Variable                     | Simple regression model |              |         | Multiple regression model |              |         |
|------------------------------|-------------------------|--------------|---------|---------------------------|--------------|---------|
|                              | OR                      | 95% CI       | P value | OR                        | 95% CI       | P value |
| <b>Social Grade</b>          |                         |              |         |                           |              |         |
| C1                           | 0.87                    | (0.65, 1.16) | 0.33    | 0.76                      | (0.55, 1.04) | 0.086   |
| C2                           | 1.05                    | (0.76, 1.44) | 0.77    | 0.84                      | (0.57, 1.22) | 0.35    |
| D                            | 1.30                    | (0.91, 1.86) | 0.15    | 1.07                      | (0.70, 1.62) | 0.77    |
| E                            | 1.20                    | (0.82, 1.75) | 0.34    | 0.96                      | (0.62, 1.50) | 0.86    |
| <b>Smoking Status</b>        |                         |              |         |                           |              |         |
| Previous smoker              | 0.66                    | (0.52, 0.86) | 0.002   | 0.83                      | (0.63, 1.09) | 0.18    |
| Current (tried quitting)     | 1.07                    | (0.79, 1.45) | 0.67    | 1.08                      | (0.78, 1.49) | 0.64    |
| Current (not tried quitting) | 0.85                    | (0.54, 1.33) | 0.47    | 0.80                      | (0.50, 1.28) | 0.34    |
| Refused to answer            | 1.04                    | (0.63, 1.71) | 0.89    | 0.87                      | (0.52, 1.45) | 0.60    |
| <b>Area</b>                  |                         |              |         |                           |              |         |
| North                        | 0.48                    | (0.30, 0.78) | 0.003   | 0.76                      | (0.46, 1.27) | 0.29    |
| North West                   | 0.71                    | (0.47, 1.05) | 0.086   | 1.00                      | (0.66, 1.53) | 0.98    |
| Yorks Hum                    | 0.53                    | (0.34, 0.83) | 0.005   | 0.79                      | (0.49, 1.29) | 0.35    |
| East Midlands                | 0.49                    | (0.32, 0.75) | 0.001   | 0.62                      | (0.40, 0.97) | 0.036   |
| West Midlands                | 0.36                    | (0.22, 0.60) | < 0.001 | 0.64                      | (0.37, 1.10) | 0.11    |
| East Anglia                  | 1.03                    | (0.54, 1.95) | 0.93    | 1.55                      | (0.79, 3.02) | 0.20    |
| South East                   | 0.74                    | (0.46, 1.19) | 0.21    | 1.31                      | (0.79, 2.19) | 0.30    |
| South West                   | 0.37                    | (0.25, 0.53) | < 0.001 | 0.65                      | (0.43, 0.99) | 0.044   |
| Wales                        | 0.41                    | (0.24, 0.69) | 0.001   | 0.75                      | (0.42, 1.31) | 0.31    |
| Scotland                     | 0.37                    | (0.24, 0.58) | < 0.001 | 0.61                      | (0.37, 0.99) | 0.046   |

*OR is odds ratio; CI is confidence interval; simple univariable regression models included only the categories for that variable; multiple regression include all variables. Reference categories were 65 and over (age), no children breastfed, no children, white ethnicity, male sex, university education social grade A and B combined, never smoked, and London.*



**Table 15** Results from the two part model to estimate the acceptable values for shopping voucher among those who agreed with providing vouchers to mothers for smoking cessation

|                                                    | Probit (Agree or not) |        |            |         | Amount of shopping voucher |            |       |      |
|----------------------------------------------------|-----------------------|--------|------------|---------|----------------------------|------------|-------|------|
|                                                    | $\beta$               | 95% CI | $p$ -value | $\beta$ | 95% CI                     | $p$ -value |       |      |
| AGE                                                | -0.01                 | -0.02  | 0.00       | 0.10    | -0.09                      | -0.27      | 0.09  | 0.33 |
| Region (base category: Greater London)             |                       |        |            |         |                            |            |       |      |
| North                                              | -0.40                 | -0.77  | -0.03      | 0.04    | -4.07                      | -13.28     | 5.15  | 0.39 |
| North West                                         | 0.17                  | -0.15  | 0.48       | 0.30    | -0.59                      | -7.31      | 6.13  | 0.86 |
| Yorks and Humberside                               | -0.27                 | -0.61  | 0.08       | 0.13    | -3.80                      | -12.28     | 4.69  | 0.38 |
| West Midlands                                      | -0.31                 | -0.63  | 0.02       | 0.07    | -3.65                      | -11.57     | 4.27  | 0.37 |
| East Midlands                                      | -0.18                 | -0.56  | 0.21       | 0.38    | -8.59                      | -18.26     | 1.08  | 0.08 |
| East Anglia                                        | -0.02                 | -0.48  | 0.43       | 0.92    | 5.56                       | -4.82      | 15.94 | 0.29 |
| South West                                         | 0.22                  | -0.15  | 0.59       | 0.24    | -9.13                      | -16.14     | -2.12 | 0.01 |
| South East                                         | 0.07                  | -0.23  | 0.37       | 0.64    | -8.80                      | -15.09     | -2.51 | 0.01 |
| Wales                                              | -0.40                 | -0.79  | -0.01      | 0.05    | -2.82                      | -12.40     | 6.76  | 0.56 |
| Scotland                                           | -0.14                 | -0.49  | 0.20       | 0.42    | -6.43                      | -14.83     | 1.97  | 0.13 |
| Education (base category: University)              |                       |        |            |         |                            |            |       |      |
| GCSE                                               | -0.30                 | -0.53  | -0.07      | 0.01    | -2.03                      | -6.74      | 2.68  | 0.40 |
| A-level                                            | -0.35                 | -0.60  | -0.10      | 0.01    | -4.07                      | -9.35      | 1.22  | 0.13 |
| No formal qualification                            | -0.07                 | -0.36  | 0.21       | 0.62    | 2.20                       | -3.95      | 8.35  | 0.48 |
| Other, still studying, do not know                 | -0.12                 | -0.42  | 0.18       | 0.42    | -3.97                      | -10.24     | 2.30  | 0.21 |
| Smoking status (base category: Never smoker)       |                       |        |            |         |                            |            |       |      |
| Previous smoker                                    | -0.02                 | -0.22  | 0.17       | 0.81    | -1.04                      | -5.16      | 3.08  | 0.62 |
| Current (tried quitting)                           | 0.24                  | 0.01   | 0.47       | 0.04    | 5.27                       | 0.00       | 10.54 | 0.05 |
| Current (not tried quitting)                       | 0.05                  | -0.30  | 0.41       | 0.76    | 3.53                       | -5.31      | 12.37 | 0.43 |
| Refused to answer                                  | 0.14                  | -0.25  | 0.52       | 0.49    | -3.26                      | -9.64      | 3.12  | 0.32 |
| Breastfeeding experience (base category: no child) |                       |        |            |         |                            |            |       |      |
| Yes                                                | 0.22                  | 0.03   | 0.42       | 0.02    | 4.59                       | 0.46       | 8.73  | 0.03 |
| No                                                 | 0.17                  | -0.05  | 0.39       | 0.14    | -0.55                      | -5.57      | 4.47  | 0.83 |

|                                      | Probit (Agree or not) |             |                 | Amount of shopping voucher |             |                 |
|--------------------------------------|-----------------------|-------------|-----------------|----------------------------|-------------|-----------------|
|                                      | $\beta$               | 95% CI      | <i>p</i> -value | $\beta$                    | 95% CI      | <i>p</i> -value |
| Social grade (base category: A or B) |                       |             |                 |                            |             |                 |
| C1                                   | 0.01                  | -0.21 0.24  | 0.90            | -0.21                      | -5.02 4.60  | 0.93            |
| C2                                   | 0.13                  | -0.14 0.40  | 0.35            | 3.77                       | -2.03 9.57  | 0.20            |
| D                                    | 0.09                  | -0.21 0.39  | 0.55            | -1.06                      | -7.35 5.24  | 0.74            |
| E                                    | 0.41                  | 0.09 0.73   | 0.01            | 1.35                       | -5.56 8.25  | 0.70            |
| Childbearing age (=1 if age<45)      | 0.08                  | -0.22 0.38  | 0.62            | 1.96                       | -4.80 8.71  | 0.57            |
| Female (=1 if female)                | -0.27                 | -0.43 -0.11 | 0.00            | 0.79                       | -2.59 4.18  | 0.64            |
| White (=1 if ethnic origin is white) | -0.31                 | -0.57 -0.05 | 0.02            | -5.21                      | -10.87 0.44 | 0.07            |
| Constant                             | 0.90                  | 0.31 1.48   | 0.00            | 34.22                      | 21.52 46.92 | 0.00            |
| R <sup>2</sup>                       |                       |             |                 |                            | 0.1065      |                 |
| Pseudo R <sup>2</sup>                |                       | 0.0598      |                 |                            |             |                 |
| N                                    |                       | 1,144       |                 |                            | 660         |                 |

**Table 16** Results from the two part model to estimate the acceptability of targeting incentives to low income women only among those who agreed with providing vouchers to mothers for smoking cessation

|                                                    | Probit (Agree or not) |        |            |         | Probit (Women on low income or all) |            |      |      |
|----------------------------------------------------|-----------------------|--------|------------|---------|-------------------------------------|------------|------|------|
|                                                    | $\beta$               | 95% CI | $p$ -value | $\beta$ | 95% CI                              | $p$ -value |      |      |
| AGE                                                | -0.01                 | -0.02  | 0.00       | 0.10    | 0.00                                | -0.01      | 0.01 | 0.66 |
| Region (base category: Greater London)             |                       |        |            |         |                                     |            |      |      |
| North                                              | -0.40                 | -0.77  | -0.03      | 0.04    | -0.19                               | -0.71      | 0.34 | 0.48 |
| North West                                         | 0.17                  | -0.15  | 0.48       | 0.30    | 0.12                                | -0.25      | 0.48 | 0.52 |
| Yorks and Humberside                               | -0.27                 | -0.61  | 0.08       | 0.13    | -0.09                               | -0.55      | 0.36 | 0.69 |
| West Midlands                                      | -0.31                 | -0.63  | 0.02       | 0.07    | -0.01                               | -0.44      | 0.43 | 0.97 |
| East Midlands                                      | -0.18                 | -0.56  | 0.21       | 0.38    | -0.43                               | -0.98      | 0.12 | 0.13 |
| East Anglia                                        | -0.02                 | -0.48  | 0.43       | 0.92    | 0.35                                | -0.22      | 0.92 | 0.23 |
| South West                                         | 0.22                  | -0.15  | 0.59       | 0.24    | 0.48                                | 0.02       | 0.93 | 0.04 |
| South East                                         | 0.07                  | -0.23  | 0.37       | 0.64    | 0.17                                | -0.21      | 0.54 | 0.38 |
| Wales                                              | -0.40                 | -0.79  | -0.01      | 0.05    | -0.12                               | -0.70      | 0.46 | 0.68 |
| Scotland                                           | -0.14                 | -0.49  | 0.20       | 0.42    | 0.81                                | 0.34       | 1.27 | 0.00 |
| Education (base category: University)              |                       |        |            |         |                                     |            |      |      |
| GCSE                                               | -0.30                 | -0.53  | -0.07      | 0.01    | -0.22                               | -0.52      | 0.09 | 0.16 |
| A-level                                            | -0.35                 | -0.60  | -0.10      | 0.01    | 0.09                                | -0.24      | 0.42 | 0.59 |
| No formal qualification                            | -0.07                 | -0.36  | 0.21       | 0.62    | -0.28                               | -0.66      | 0.09 | 0.14 |
| Other, still studying, do not know                 | -0.12                 | -0.42  | 0.18       | 0.42    | -0.14                               | -0.52      | 0.25 | 0.49 |
| Smoking status (base category: Never smoker)       |                       |        |            |         |                                     |            |      |      |
| Previous smoker                                    | -0.02                 | -0.22  | 0.17       | 0.81    | -0.08                               | -0.35      | 0.19 | 0.57 |
| Current (tried quitting)                           | 0.24                  | 0.01   | 0.47       | 0.04    | -0.04                               | -0.33      | 0.24 | 0.77 |
| Current (not tried quitting)                       | 0.05                  | -0.30  | 0.41       | 0.76    | -0.12                               | -0.57      | 0.32 | 0.59 |
| Refused to answer                                  | 0.14                  | -0.25  | 0.52       | 0.49    | -0.00                               | -0.46      | 0.46 | 0.99 |
| Breastfeeding experience (base category: no child) |                       |        |            |         |                                     |            |      |      |
| Yes                                                | 0.22                  | 0.03   | 0.42       | 0.02    | 0.08                                | -0.17      | 0.33 | 0.53 |

|                                      | Probit (Agree or not) |             |                 | Probit (Women on low income or all) |            |                 |
|--------------------------------------|-----------------------|-------------|-----------------|-------------------------------------|------------|-----------------|
|                                      | $\beta$               | 95% CI      | <i>p</i> -value | $\beta$                             | 95% CI     | <i>p</i> -value |
| No                                   | 0.17                  | -0.05 0.39  | 0.14            | 0.20                                | -0.09 0.49 | 0.18            |
| Social grade (base category: A or B) |                       |             |                 |                                     |            |                 |
| C1                                   | 0.01                  | -0.21 0.24  | 0.90            | 0.15                                | -0.15 0.46 | 0.32            |
| C2                                   | 0.13                  | -0.14 0.40  | 0.35            | 0.12                                | -0.24 0.49 | 0.51            |
| D                                    | 0.09                  | -0.21 0.39  | 0.55            | 0.23                                | -0.16 0.63 | 0.25            |
| E                                    | 0.41                  | 0.09 0.73   | 0.01            | 0.18                                | -0.23 0.59 | 0.38            |
| Childbearing age (=1 if age<45)      | 0.08                  | -0.22 0.38  | 0.62            | -0.00                               | -0.40 0.39 | 0.99            |
| Female (=1 if female)                | -0.27                 | -0.43 -0.11 | 0.00            | -0.17                               | -0.37 0.04 | 0.11            |
| White (=1 if ethnic origin is white) | -0.31                 | -0.57 -0.05 | 0.02            | 0.12                                | -0.18 0.43 | 0.43            |
| Constant                             | 0.90                  | 0.31 1.48   | 0.00            | -0.46                               | -1.23 0.32 | 0.25            |
| Pseudo R <sup>2</sup>                |                       | 0.0598      |                 |                                     | 0.0523     |                 |
| N                                    |                       | 1,144       |                 |                                     | 660        |                 |

**Table 17** Results from the two part model to estimate the acceptable value for shopping voucher among those who agreed with providing vouchers for breastfeeding

|                                                    | Probit (Agree or not) |        |       |                 | Amount of shopping voucher |        |       |                 |
|----------------------------------------------------|-----------------------|--------|-------|-----------------|----------------------------|--------|-------|-----------------|
|                                                    | $\beta$               | 95% CI |       | <i>p</i> -value | $\beta$                    | 95% CI |       | <i>p</i> -value |
| AGE                                                | -0.01                 | -0.01  | 0.00  | 0.18            | -0.12                      | -0.29  | 0.05  | 0.17            |
| Region (base category: Greater London)             |                       |        |       |                 |                            |        |       |                 |
| North                                              | -0.21                 | -0.60  | 0.17  | 0.27            | -2.26                      | -10.77 | 6.25  | 0.60            |
| North West                                         | 0.00                  | -0.32  | 0.33  | 0.98            | -1.36                      | -7.96  | 5.23  | 0.69            |
| Yorks and Humberside                               | -0.25                 | -0.60  | 0.10  | 0.17            | -4.08                      | -12.30 | 4.13  | 0.33            |
| West Midlands                                      | -0.39                 | -0.73  | -0.06 | 0.02            | -4.02                      | -11.15 | 3.10  | 0.27            |
| East Midlands                                      | -0.53                 | -0.93  | -0.13 | 0.01            | -12.68                     | -21.34 | -4.02 | 0.00            |
| East Anglia                                        | -0.09                 | -0.57  | 0.38  | 0.70            | -1.73                      | -12.38 | 8.92  | 0.75            |
| South West                                         | 0.23                  | -0.16  | 0.61  | 0.24            | -7.50                      | -14.56 | -0.45 | 0.04            |
| South East                                         | -0.17                 | -0.47  | 0.14  | 0.29            | -11.37                     | -17.49 | -5.26 | 0.00            |
| Wales                                              | -0.45                 | -0.85  | -0.05 | 0.03            | -10.66                     | -19.14 | -2.18 | 0.01            |
| Scotland                                           | -0.05                 | -0.41  | 0.31  | 0.78            | -11.57                     | -18.62 | -4.52 | 0.00            |
| Education (base category: University)              |                       |        |       |                 |                            |        |       |                 |
| GCSE                                               | 0.05                  | -0.19  | 0.29  | 0.67            | 2.31                       | -2.32  | 6.93  | 0.33            |
| A-level                                            | -0.20                 | -0.45  | 0.05  | 0.11            | 1.74                       | -3.76  | 7.25  | 0.53            |
| No formal qualification                            | 0.31                  | 0.01   | 0.61  | 0.04            | 5.43                       | -0.47  | 11.34 | 0.07            |
| Other, still studying, do not know                 | 0.10                  | -0.21  | 0.40  | 0.54            | -0.13                      | -5.48  | 5.23  | 0.96            |
| Smoking status (base category: Never smoker)       |                       |        |       |                 |                            |        |       |                 |
| Previous smoker                                    | -0.10                 | -0.29  | 0.10  | 0.33            | 0.39                       | -3.85  | 4.64  | 0.86            |
| Current (tried quitting)                           | 0.06                  | -0.17  | 0.30  | 0.61            | 4.70                       | -0.40  | 9.81  | 0.07            |
| Current (not tried quitting)                       | -0.23                 | -0.58  | 0.12  | 0.19            | -1.66                      | -8.43  | 5.11  | 0.63            |
| Refused to answer                                  | 0.09                  | -0.30  | 0.48  | 0.65            | -2.39                      | -9.95  | 5.16  | 0.53            |
| Breastfeeding experience (base category: no child) |                       |        |       |                 |                            |        |       |                 |
| Yes                                                | -0.01                 | -0.20  | 0.18  | 0.91            | 6.88                       | 2.77   | 10.99 | 0.00            |
| No                                                 | -0.16                 | -0.38  | 0.06  | 0.16            | -0.54                      | -4.87  | 3.79  | 0.81            |

|                                      | Probit (Agree or not) |             |                 | Amount of shopping voucher |              |                 |
|--------------------------------------|-----------------------|-------------|-----------------|----------------------------|--------------|-----------------|
|                                      | $\beta$               | 95% CI      | <i>p</i> -value | $\beta$                    | 95% CI       | <i>p</i> -value |
| Social grade (base category: A or B) |                       |             |                 |                            |              |                 |
| C1                                   | -0.20                 | -0.42 0.03  | 0.09            | -3.85                      | -8.80 1.09   | 0.13            |
| C2                                   | 0.02                  | -0.26 0.29  | 0.91            | -5.36                      | -10.64 -0.07 | 0.05            |
| D                                    | -0.01                 | -0.31 0.30  | 0.95            | -5.43                      | -11.37 0.51  | 0.07            |
| E                                    | 0.06                  | -0.26 0.39  | 0.70            | -3.42                      | -10.14 3.30  | 0.32            |
| Childbearing age (=1 if age<45)      | 0.10                  | -0.20 0.40  | 0.52            | 0.35                       | -6.30 6.99   | 0.92            |
| Female (=1 if female)                | -0.33                 | -0.49 -0.17 | 0.00            | 2.95                       | -0.38 6.27   | 0.08            |
| White (=1 if ethnic origin is white) | -0.52                 | -0.81 -0.23 | 0.00            | -8.44                      | -13.82 -3.06 | 0.00            |
| Constant                             | 1.38                  | 0.77 1.99   | 0.00            | 38.66                      | 26.40 50.92  | 0.00            |
| R <sup>2</sup>                       |                       |             |                 |                            | 0.1390       |                 |
| Pseudo R <sup>2</sup>                |                       | 0.0750      |                 |                            |              |                 |
| N                                    |                       | 1,144       |                 |                            | 697          |                 |

**Table 18** Results from the two part model to estimate the acceptability of targeting to low income women only among those who agreed with providing vouchers for breastfeeding

|                                                    | Probit (Agree or not) |        |            |         | Probit (Women on low income or all) |            |      |      |
|----------------------------------------------------|-----------------------|--------|------------|---------|-------------------------------------|------------|------|------|
|                                                    | $\beta$               | 95% CI | $p$ -value | $\beta$ | 95% CI                              | $p$ -value |      |      |
| AGE                                                | -0.01                 | -0.01  | 0.00       | 0.18    | 0.01                                | -0.00      | 0.02 | 0.10 |
| Region (base category: Greater London)             |                       |        |            |         |                                     |            |      |      |
| North                                              | -0.21                 | -0.60  | 0.17       | 0.27    | -0.05                               | -0.53      | 0.43 | 0.84 |
| North West                                         | 0.00                  | -0.32  | 0.33       | 0.98    | 0.18                                | -0.18      | 0.54 | 0.33 |
| Yorks and Humberside                               | -0.25                 | -0.60  | 0.10       | 0.17    | 0.18                                | -0.25      | 0.61 | 0.41 |
| West Midlands                                      | -0.39                 | -0.73  | -0.06      | 0.02    | -0.07                               | -0.49      | 0.34 | 0.73 |
| East Midlands                                      | -0.53                 | -0.93  | -0.13      | 0.01    | -0.01                               | -0.58      | 0.55 | 0.96 |
| East Anglia                                        | -0.09                 | -0.57  | 0.38       | 0.70    | 0.53                                | -0.04      | 1.10 | 0.07 |
| South West                                         | 0.23                  | -0.16  | 0.61       | 0.24    | 0.65                                | 0.21       | 1.10 | 0.00 |
| South East                                         | -0.17                 | -0.47  | 0.14       | 0.29    | 0.18                                | -0.19      | 0.55 | 0.34 |
| Wales                                              | -0.45                 | -0.85  | -0.05      | 0.03    | 0.31                                | -0.24      | 0.86 | 0.27 |
| Scotland                                           | -0.05                 | -0.41  | 0.31       | 0.78    | 0.60                                | 0.18       | 1.03 | 0.01 |
| Education (base category: University)              |                       |        |            |         |                                     |            |      |      |
| GCSE                                               | 0.05                  | -0.19  | 0.29       | 0.67    | 0.06                                | -0.23      | 0.35 | 0.68 |
| A-level                                            | -0.20                 | -0.45  | 0.05       | 0.11    | -0.00                               | -0.32      | 0.32 | 1.00 |
| No formal qualification                            | 0.31                  | 0.01   | 0.61       | 0.04    | 0.11                                | -0.26      | 0.49 | 0.55 |
| Other, still studying, do not know                 | 0.10                  | -0.21  | 0.40       | 0.54    | 0.24                                | -0.14      | 0.62 | 0.22 |
| Smoking status (base category: Never smoker)       |                       |        |            |         |                                     |            |      |      |
| Previous smoker                                    | -0.10                 | -0.29  | 0.10       | 0.33    | -0.07                               | -0.34      | 0.19 | 0.59 |
| Current (tried quitting)                           | 0.06                  | -0.17  | 0.30       | 0.61    | -0.10                               | -0.38      | 0.19 | 0.50 |
| Current (not tried quitting)                       | -0.23                 | -0.58  | 0.12       | 0.19    | -0.13                               | -0.56      | 0.30 | 0.56 |
| Refused to answer                                  | 0.09                  | -0.30  | 0.48       | 0.65    | 0.13                                | -0.31      | 0.57 | 0.56 |
| Breastfeeding experience (base category: no child) |                       |        |            |         |                                     |            |      |      |
| Yes                                                | -0.01                 | -0.20  | 0.18       | 0.91    | -0.06                               | -0.30      | 0.18 | 0.62 |

|                                      | Probit (Agree or not) |        |                 | Probit (Women on low income or all) |        |                 |       |      |
|--------------------------------------|-----------------------|--------|-----------------|-------------------------------------|--------|-----------------|-------|------|
|                                      | $\beta$               | 95% CI | <i>p</i> -value | $\beta$                             | 95% CI | <i>p</i> -value |       |      |
| No                                   | -0.16                 | -0.38  | 0.06            | 0.16                                | 0.04   | -0.24           | 0.33  | 0.76 |
| Social grade (base category: A or B) |                       |        |                 |                                     |        |                 |       |      |
| C1                                   | -0.20                 | -0.42  | 0.03            | 0.09                                | -0.20  | -0.49           | 0.10  | 0.19 |
| C2                                   | 0.02                  | -0.26  | 0.29            | 0.91                                | -0.09  | -0.44           | 0.25  | 0.60 |
| D                                    | -0.01                 | -0.31  | 0.30            | 0.95                                | -0.11  | -0.48           | 0.27  | 0.58 |
| E                                    | 0.06                  | -0.26  | 0.39            | 0.70                                | -0.15  | -0.55           | 0.25  | 0.45 |
| Childbearing age (=1 if age<45)      | 0.10                  | -0.20  | 0.40            | 0.52                                | 0.23   | -0.16           | 0.61  | 0.25 |
| Female (=1 if female)                | -0.33                 | -0.49  | -0.17           | 0.00                                | -0.28  | -0.48           | -0.08 | 0.01 |
| White (=1 if ethnic origin is white) | -0.52                 | -0.81  | -0.23           | 0.00                                | -0.13  | -0.42           | 0.16  | 0.37 |
| Constant                             | 1.38                  | 0.77   | 1.99            | 0.00                                | -0.47  | -1.21           | 0.27  | 0.21 |
| Pseudo R <sup>2</sup>                |                       | 0.0750 |                 |                                     |        | 0.0416          |       |      |
| N                                    |                       | 1,144  |                 |                                     |        | 660             |       |      |



## STROBE Statement—checklist of items that should be included in reports of observational studies

|                              | Item No | Recommendation                                                                                                                                                                                                                                                                                                                                                                                                                                                         |      |
|------------------------------|---------|------------------------------------------------------------------------------------------------------------------------------------------------------------------------------------------------------------------------------------------------------------------------------------------------------------------------------------------------------------------------------------------------------------------------------------------------------------------------|------|
| <b>Title and abstract</b>    | 1       | (a) Indicate the study's design with a commonly used term in the title or the abstract                                                                                                                                                                                                                                                                                                                                                                                 | P1/2 |
|                              |         | (b) Provide in the abstract an informative and balanced summary of what was done and what was found                                                                                                                                                                                                                                                                                                                                                                    | P2   |
| <b>Introduction</b>          |         |                                                                                                                                                                                                                                                                                                                                                                                                                                                                        |      |
| Background/rationale         | 2       | Explain the scientific background and rationale for the investigation being reported                                                                                                                                                                                                                                                                                                                                                                                   | P3/4 |
| Objectives                   | 3       | State specific objectives, including any prespecified hypotheses                                                                                                                                                                                                                                                                                                                                                                                                       | P4   |
| <b>Methods</b>               |         |                                                                                                                                                                                                                                                                                                                                                                                                                                                                        |      |
| Study design                 | 4       | Present key elements of study design early in the paper                                                                                                                                                                                                                                                                                                                                                                                                                | P4   |
| Setting                      | 5       | Describe the setting, locations, and relevant dates, including periods of recruitment, exposure, follow-up, and data collection                                                                                                                                                                                                                                                                                                                                        | P4   |
| Participants                 | 6       | (a) <i>Cohort study</i> —Give the eligibility criteria, and the sources and methods of selection of participants. Describe methods of follow-up<br><i>Case-control study</i> —Give the eligibility criteria, and the sources and methods of case ascertainment and control selection. Give the rationale for the choice of cases and controls<br><i>Cross-sectional study</i> —Give the eligibility criteria, and the sources and methods of selection of participants | P4/5 |
|                              |         | (b) <i>Cohort study</i> —For matched studies, give matching criteria and number of exposed and unexposed<br><i>Case-control study</i> —For matched studies, give matching criteria and the number of controls per case                                                                                                                                                                                                                                                 | P4/5 |
| Variables                    | 7       | Clearly define all outcomes, exposures, predictors, potential confounders, and effect modifiers. Give diagnostic criteria, if applicable                                                                                                                                                                                                                                                                                                                               | P5   |
| Data sources/<br>measurement | 8*      | For each variable of interest, give sources of data and details of methods of assessment (measurement). Describe comparability of assessment methods if there is more than one group                                                                                                                                                                                                                                                                                   | P4/5 |
| Bias                         | 9       | Describe any efforts to address potential sources of bias                                                                                                                                                                                                                                                                                                                                                                                                              | P5   |
| Study size                   | 10      | Explain how the study size was arrived at                                                                                                                                                                                                                                                                                                                                                                                                                              | P5   |
| Quantitative variables       | 11      | Explain how quantitative variables were handled in the analyses. If applicable, describe which groupings were chosen and why                                                                                                                                                                                                                                                                                                                                           | P5   |
| Statistical methods          | 12      | (a) Describe all statistical methods, including those used to control for confounding                                                                                                                                                                                                                                                                                                                                                                                  | P5/6 |
|                              |         | (b) Describe any methods used to examine subgroups and interactions                                                                                                                                                                                                                                                                                                                                                                                                    | P5   |
|                              |         | (c) Explain how missing data were addressed                                                                                                                                                                                                                                                                                                                                                                                                                            | P5/6 |
|                              |         | (d) <i>Cohort study</i> —If applicable, explain how loss to follow-up was addressed<br><i>Case-control study</i> —If applicable, explain how matching of cases and controls was addressed<br><i>Cross-sectional study</i> —If applicable, describe analytical methods taking account of sampling strategy                                                                                                                                                              | P5   |
|                              |         | (e) Describe any sensitivity analyses                                                                                                                                                                                                                                                                                                                                                                                                                                  | N/A  |

Continued on next page

| <b>Results</b>           |     |                                                                                                                                                                                                                                                                                                                                                                                                               |                                                            |                                                                                                |     |
|--------------------------|-----|---------------------------------------------------------------------------------------------------------------------------------------------------------------------------------------------------------------------------------------------------------------------------------------------------------------------------------------------------------------------------------------------------------------|------------------------------------------------------------|------------------------------------------------------------------------------------------------|-----|
| Participants             | 13* | (a) Report numbers of individuals at each stage of study—eg numbers potentially eligible, examined for eligibility, confirmed eligible, included in the study, completing follow-up, and analysed<br>(b) Give reasons for non-participation at each stage<br>(c) Consider use of a flow diagram                                                                                                               | P6, Table 1<br>N/A                                         |                                                                                                |     |
| Descriptive data         | 14* | (a) Give characteristics of study participants (eg demographic, clinical, social) and information on exposures and potential confounders                                                                                                                                                                                                                                                                      | P6, Table 1                                                |                                                                                                |     |
|                          |     | (b) Indicate number of participants with missing data for each variable of interest                                                                                                                                                                                                                                                                                                                           | P6, Table 1                                                |                                                                                                |     |
|                          |     | (c) <i>Cohort study</i> —Summarise follow-up time (eg, average and total amount)                                                                                                                                                                                                                                                                                                                              | N/A                                                        |                                                                                                |     |
| Outcome data             | 15* | <i>Cohort study</i> —Report numbers of outcome events or summary measures over time                                                                                                                                                                                                                                                                                                                           |                                                            |                                                                                                |     |
|                          |     | <i>Case-control study</i> —Report numbers in each exposure category, or summary measures of exposure                                                                                                                                                                                                                                                                                                          |                                                            |                                                                                                |     |
|                          |     | <i>Cross-sectional study</i> —Report numbers of outcome events or summary measures                                                                                                                                                                                                                                                                                                                            | P6-8                                                       |                                                                                                |     |
| Main results             | 16  | (a) Give unadjusted estimates and, if applicable, confounder-adjusted estimates and their precision (eg, 95% confidence interval). Make clear which confounders were adjusted for and why they were included<br>(b) Report category boundaries when continuous variables were categorized<br>(c) If relevant, consider translating estimates of relative risk into absolute risk for a meaningful time period | P6-8, Tables 2-4, Figure 1, Web appendices of full results |                                                                                                |     |
|                          |     | Other analyses                                                                                                                                                                                                                                                                                                                                                                                                | 17                                                         | Report other analyses done—eg analyses of subgroups and interactions, and sensitivity analyses | N/A |
|                          |     | <b>Discussion</b>                                                                                                                                                                                                                                                                                                                                                                                             |                                                            |                                                                                                |     |
| Key results              | 18  | Summarise key results with reference to study objectives                                                                                                                                                                                                                                                                                                                                                      | P8                                                         |                                                                                                |     |
| Limitations              | 19  | Discuss limitations of the study, taking into account sources of potential bias or imprecision. Discuss both direction and magnitude of any potential bias                                                                                                                                                                                                                                                    | P9                                                         |                                                                                                |     |
| Interpretation           | 20  | Give a cautious overall interpretation of results considering objectives, limitations, multiplicity of analyses, results from similar studies, and other relevant evidence                                                                                                                                                                                                                                    | P9                                                         |                                                                                                |     |
| Generalisability         | 21  | Discuss the generalisability (external validity) of the study results                                                                                                                                                                                                                                                                                                                                         | P9                                                         |                                                                                                |     |
| <b>Other information</b> |     |                                                                                                                                                                                                                                                                                                                                                                                                               |                                                            |                                                                                                |     |
| Funding                  | 22  | Give the source of funding and the role of the funders for the present study and, if applicable, for the original study on which the present article is based                                                                                                                                                                                                                                                 | P12/13                                                     |                                                                                                |     |

\*Give information separately for cases and controls in case-control studies and, if applicable, for exposed and unexposed groups in cohort and cross-sectional studies.

1  
2  
3  
4  
5  
6  
7  
8  
9  
10  
11  
12  
13  
14  
15  
16  
17  
18  
19  
20  
21  
22  
23  
24  
25  
26  
27  
28  
29  
30  
31  
32  
33  
34  
35  
36  
37  
38  
39  
40  
41  
42  
43  
44  
45  
46  
47  
48  
49  
50  
51  
52  
53  
54  
55  
56  
57  
58  
59  
60

**Note:** An Explanation and Elaboration article discusses each checklist item and gives methodological background and published examples of transparent reporting. The STROBE checklist is best used in conjunction with this article (freely available on the Web sites of PLoS Medicine at <http://www.plosmedicine.org/>, Annals of Internal Medicine at <http://www.annals.org/>, and Epidemiology at <http://www.epidem.com/>). Information on the STROBE Initiative is available at [www.strobe-statement.org](http://www.strobe-statement.org).

For peer review only
